# Supplementary material for: Polyhedral metallaheteroborane chemistry. Synthesis, spectroscopy, structure and dynamics of eleven-vertex {RhNB9} and {PtCB9} metallaheteroboranes.
Source: Royal Society of Chemistry journal article supplement (doi:10.1039/b702767b), 2007-01-01
Supplement: b702767b.pdf [file b702767b.pdf]

=====

S U P P L E M E N T A R Y M A T E R I A L

=====

B E L O N G I N G T O T H E P A P E R

Polyhedral metallaheteroborane chemistry. Synthesis, spectroscopy, structure and dynamics of the eleven-vertex rhodaazaborane [8,8-(PPh<sub>3</sub>)<sub>2</sub>-nido-8,7-RhNB<sub>9</sub>H<sub>11</sub>] and the platinacarbaborane [9-(OMe)-8,8-(PMe<sub>2</sub>Ph)<sub>2</sub>-nido-8,7-PtCB<sub>9</sub>H<sub>10</sub>]

b y

Ramón Macías, Jonathan Bould, Josef Holub, John D. Kennedy, Bohumil Štíbr and Mark Thornton-Pett

C o n t e n t s

=====

- Table S1 - Crystal Data and Details of the Structure Determination  
For [8,8-(PPh<sub>3</sub>)<sub>2</sub>-nido-8,7-RhNB<sub>9</sub>H<sub>11</sub>] (1)
- Table S2 - Final Coordinates and Equivalent Isotropic Displacement  
Parameters of the non-Hydrogen atoms  
For [8,8-(PPh<sub>3</sub>)<sub>2</sub>-nido-8,7-RhNB<sub>9</sub>H<sub>11</sub>] (1)
- Table S3 - Hydrogen Atom Positions and Isotropic Displacement  
Parameters  
For [8,8-(PPh<sub>3</sub>)<sub>2</sub>-nido-8,7-RhNB<sub>9</sub>H<sub>11</sub>] (1)
- Table S4 - (An)isotropic Displacement Parameters  
For [8,8-(PPh<sub>3</sub>)<sub>2</sub>-nido-8,7-RhNB<sub>9</sub>H<sub>11</sub>] (1)
- Table S5 - Bond Distances (Angstrom)  
For [8,8-(PPh<sub>3</sub>)<sub>2</sub>-nido-8,7-RhNB<sub>9</sub>H<sub>11</sub>] (1)
- Table S6 - Bond Angles (Degrees)  
For [8,8-(PPh<sub>3</sub>)<sub>2</sub>-nido-8,7-RhNB<sub>9</sub>H<sub>11</sub>] (1)
- Table S7 - Torsion Angles (Degrees)  
For [8,8-(PPh<sub>3</sub>)<sub>2</sub>-nido-8,7-RhNB<sub>9</sub>H<sub>11</sub>] (1)
- Table S8 - Contact Distances(Angstrom)  
for[8,8-(PPh<sub>3</sub>)<sub>2</sub>-nido-8,7-RhNB<sub>9</sub>H<sub>11</sub>] (1)
- Table S9 - Crystal Data and Details of the Structure Determination  
For [9-(OMe)-8,8-(PMe<sub>2</sub>Ph)<sub>2</sub>-NIDO-8,7-PtCB<sub>9</sub>H<sub>11</sub>] (2)
- Table S10 - Final Coordinates and Equivalent Isotropic Displacement  
Parameters of the non-Hydrogen atoms  
For [9-(OMe)-8,8-(PMe<sub>2</sub>Ph)<sub>2</sub>-NIDO-8,7-PtCB<sub>9</sub>H<sub>11</sub>] (2)
- Table S11 - Hydrogen Atom Positions and Isotropic Displacement

Parameters

for [9-(OMe)-8,8-(PMe2Ph)2-NIDO-8,7-PtCB9H11] (2)

Table S12 - (An)isotropic Displacement Parameters

for [9-(OMe)-8,8-(PMe2Ph)2-NIDO-8,7-PtCB9H11] (2)

Table S13 - Bond Distances (Angstrom)

for [9-(OMe)-8,8-(PMe2Ph)2-NIDO-8,7-PtCB9H11] (2)

Table S14 - Bond Angles (Degrees)

for [9-(OMe)-8,8-(PMe2Ph)2-NIDO-8,7-PtCB9H11] (2)

Table S15 - Torsion Angles (Degrees)

for [9-(OMe)-8,8-(PMe2Ph)2-NIDO-8,7-PtCB9H11] (2)

Table S16 - Contact Distances(Angstrom)

for [9-(OMe)-8,8-(PMe2Ph)2-NIDO-8,7-PtCB9H11] (2)

Table S17 - Hydrogen Bonds (Angstrom, Deg)

for [9-(OMe)-8,8-(PMe2Ph)2-NIDO-8,7-PtCB9H11] (2)

Table S18 - Selected interatomic distances (Å) for [8,8-(PPh<sub>3</sub>)-*nido*-8,7-RhSB<sub>9</sub>H<sub>10</sub>] (**4**), with estimated standard uncertainties (s.u) in parentheses; and the corresponding calculated for the model compound [8,8-(PH<sub>3</sub>)-*nido*-8,7-RhSB<sub>9</sub>H<sub>10</sub>](**4a**)

Table S19 - Calculated coordinates (DFT; B3LYP / 6-31G\*, LANL2DZ) for [isonido-(PH<sub>3</sub>)<sub>2</sub>HRhSB<sub>9</sub>H<sub>9</sub>] (compound **4b**)..

Table S20 - Calculated coordinates (DFT; B3LYP / 6-31G\*, LANL2DZ) for [nido-(PH<sub>3</sub>)<sub>2</sub>HRhSB<sub>9</sub>H<sub>9</sub>] (compound **4a**)

Table S21 - Calculated coordinates (DFT; B3LYP / 6-31G\*, LANL2DZ) for [(PH<sub>3</sub>)<sub>2</sub>HRhSB<sub>9</sub>H<sub>9</sub>] (compound **4** transition state).

Table S22 - Calculated coordinates (DFT; B3LYP / 6-31G\*, LANL2DZ) for [(PH<sub>3</sub>)<sub>2</sub>HRhNB<sub>9</sub>H<sub>10</sub>] (compound **1a** ground state).

Table S23- Calculated coordinates (DFT; B3LYP / 6-31G\*, LANL2DZ)for [(PH<sub>3</sub>)<sub>2</sub>HRhNB<sub>9</sub>H<sub>10</sub>] (compound **1a** transition state).

Table S1 - Crystal Data and Details of the Structure Determination  
 For [8,8-(PPh3)2-nido-8,7-RhNB9H11] (1)  
 Crystal Data

|                          |                              |           |            |
|--------------------------|------------------------------|-----------|------------|
| Formula                  | 2(C36 H41 B9 N P2 Rh), C Cl2 |           |            |
| Formula Weight           | 791.29                       |           |            |
| Crystal System           | Triclinic                    |           |            |
| Space group              | P-1                          | (No. 2)   |            |
| a, b, c [Angstrom]       | 9.7567(12)                   | 11.936(2) | 17.698(2)  |
| alpha, beta, gamma [deg] | 93.138(9)                    | 94.637(9) | 105.790(9) |
| V [Ang**3]               | 1970.4(5)                    |           |            |
| Z                        | 2                            |           |            |
| D(calc) [g/cm**3]        | 1.334                        |           |            |
| Mu(MoKa) [ /mm ]         | 0.610                        |           |            |
| F(000)                   | 808                          |           |            |
| Crystal Size [mm]        | 0.15 x 0.40 x 0.60           |           |            |

Data Collection

|                                  |                             |         |       |
|----------------------------------|-----------------------------|---------|-------|
| Temperature (K)                  | 200                         |         |       |
| Radiation [Angstrom]             | MoKa                        | 0.71069 |       |
| Theta Min-Max [Deg]              | 1.8, 25.0                   |         |       |
| Dataset                          | -11: 11 ; -14: 14 ; -17: 21 |         |       |
| Tot., Uniq. Data, R(int)         | 8429,                       | 6954,   | 0.040 |
| Observed data [I > 2.0 sigma(I)] | 5884                        |         |       |

Refinement

|                                                                    |                      |  |  |
|--------------------------------------------------------------------|----------------------|--|--|
| Nref, Npar                                                         | 6954, 502            |  |  |
| R, wR2, S                                                          | 0.0347, 0.0910, 1.03 |  |  |
| w = 1/[\s^2^(Fo^2^)+(0.0520P)^2^+2.0822P] where P=(Fo^2^+2Fc^2^)/3 |                      |  |  |
| Max. and Av. Shift/Error                                           | 0.00, 0.00           |  |  |
| Min. and Max. Resd. Dens. [e/Ang^3]                                | -0.71, 1.16          |  |  |

- 3 -

Table S2 - Final Coordinates and Equivalent Isotropic Displacement Parameters of the non-Hydrogen atoms  
 For [8,8-(PPh3)2-nido-8,7-RhNB9H11] (1)

| Atom | x | y | z | U(eq) [Ang^2] |
|------|---|---|---|---------------|
|------|---|---|---|---------------|

| ---- | ---        | ---        | ---          | -----      |
|------|------------|------------|--------------|------------|
| Rh8  | 0.13776(2) | 0.38317(2) | 0.23326(1)   | 0.0166(1)  |
| P1   | 0.11592(7) | 0.26013(6) | 0.13046(4)   | 0.0182(2)  |
| P2   | 0.01645(7) | 0.24246(6) | 0.31611(4)   | 0.0180(2)  |
| N7   | 0.1475(3)  | 0.5248(2)  | 0.32284(14)  | 0.0244(8)  |
| C111 | -0.0765(3) | 0.1997(3)  | 0.10469(16)  | 0.0258(9)  |
| C112 | -0.1521(3) | 0.2818(3)  | 0.08929(18)  | 0.0335(10) |
| C113 | -0.2995(4) | 0.2469(4)  | 0.0709(2)    | 0.0471(13) |
| C114 | -0.3734(4) | 0.1307(4)  | 0.0693(2)    | 0.0538(16) |
| C115 | -0.3007(4) | 0.0495(4)  | 0.0861(2)    | 0.0506(14) |
| C116 | -0.1521(4) | 0.0825(3)  | 0.10352(17)  | 0.0344(10) |
| C121 | 0.1999(3)  | 0.1432(2)  | 0.14564(16)  | 0.0218(8)  |
| C122 | 0.1716(4)  | 0.0434(3)  | 0.09579(18)  | 0.0301(10) |
| C123 | 0.2410(4)  | -0.0414(3) | 0.1090(2)    | 0.0373(11) |
| C124 | 0.3433(4)  | -0.0256(3) | 0.1705(2)    | 0.0376(11) |
| C125 | 0.3767(3)  | 0.0750(3)  | 0.2186(2)    | 0.0342(10) |
| C126 | 0.3045(3)  | 0.1591(3)  | 0.20667(18)  | 0.0261(9)  |
| C131 | 0.1872(3)  | 0.3087(2)  | 0.04106(16)  | 0.0218(8)  |
| C132 | 0.3309(3)  | 0.3180(3)  | 0.03306(18)  | 0.0310(10) |
| C133 | 0.3914(4)  | 0.3574(3)  | -0.03225(19) | 0.0378(11) |
| C134 | 0.3093(4)  | 0.3862(3)  | -0.09103(19) | 0.0393(11) |
| C135 | 0.1670(4)  | 0.3762(4)  | -0.0845(2)   | 0.0425(11) |
| C136 | 0.1055(3)  | 0.3377(3)  | -0.01902(18) | 0.0332(10) |
| C211 | 0.1211(3)  | 0.2425(2)  | 0.40654(16)  | 0.0231(9)  |
| C212 | 0.0601(4)  | 0.1752(3)  | 0.46364(19)  | 0.0352(11) |
| C213 | 0.1386(4)  | 0.1783(3)  | 0.5329(2)    | 0.0430(11) |
| C214 | 0.2789(4)  | 0.2474(3)  | 0.5453(2)    | 0.0415(11) |

- 4 -

Table S2 - Final Coordinates and Equivalent Isotropic Displacement Parameters of the non-Hydrogen atoms (continued)  
For [8,8-(PPh<sub>3</sub>)<sub>2</sub>-nido-8,7-RhNB<sub>9</sub>H<sub>11</sub>] (1)

| Atom  | x          | y          | z           | U(eq) [Ang <sup>2</sup> ] |
|-------|------------|------------|-------------|---------------------------|
| ----  | ---        | ---        | ---         | -----                     |
| C215  | 0.3405(4)  | 0.3132(3)  | 0.4893(2)   | 0.0384(11)                |
| C216  | 0.2628(3)  | 0.3108(3)  | 0.41966(18) | 0.0279(9)                 |
| C221  | -0.0714(3) | 0.0864(2)  | 0.29430(16) | 0.0224(8)                 |
| C222  | 0.0158(4)  | 0.0128(3)  | 0.28538(19) | 0.0321(10)                |
| C223  | -0.0431(5) | -0.1057(3) | 0.2658(2)   | 0.0458(13)                |
| C224  | -0.1893(5) | -0.1517(3) | 0.2558(2)   | 0.0486(13)                |
| C225  | -0.2767(4) | -0.0806(3) | 0.2663(2)   | 0.0479(12)                |
| C226  | -0.2186(4) | 0.0378(3)  | 0.2855(2)   | 0.0346(10)                |
| C231  | -0.1250(3) | 0.3073(2)  | 0.34217(17) | 0.0232(9)                 |
| C232  | -0.2315(3) | 0.3113(3)  | 0.28559(19) | 0.0299(10)                |
| C233  | -0.3312(4) | 0.3717(3)  | 0.3002(2)   | 0.0388(11)                |
| C234  | -0.3230(4) | 0.4311(3)  | 0.3705(2)   | 0.0438(14)                |
| C235  | -0.2186(4) | 0.4278(3)  | 0.4268(2)   | 0.0416(12)                |
| C236  | -0.1198(3) | 0.3655(3)  | 0.41361(19) | 0.0308(10)                |
| B1    | 0.1897(4)  | 0.6754(3)  | 0.2170(2)   | 0.0256(10)                |
| B2    | 0.1654(4)  | 0.6660(3)  | 0.3141(2)   | 0.0300(11)                |
| B3    | 0.0727(4)  | 0.5462(3)  | 0.2434(2)   | 0.0237(10)                |
| B4    | 0.1890(4)  | 0.5407(3)  | 0.16727(19) | 0.0221(9)                 |
| B5    | 0.3546(4)  | 0.6472(3)  | 0.1973(2)   | 0.0255(10)                |
| B6    | 0.3396(4)  | 0.7105(3)  | 0.2899(2)   | 0.0300(11)                |
| B9    | 0.3396(4)  | 0.4968(3)  | 0.2009(2)   | 0.0242(10)                |
| B10   | 0.4305(4)  | 0.6019(3)  | 0.2810(2)   | 0.0297(11)                |
| B11   | 0.2986(4)  | 0.6021(3)  | 0.3529(2)   | 0.0309(11)                |
| *C1S  | 0.5896(10) | 0.1201(8)  | 0.4960(6)   | 0.054(2)                  |
| *C11S | 0.4015(8)  | 0.0153(6)  | 0.4364(4)   | 0.145(2)                  |

- 5 -

Table S2 - Final Coordinates and Equivalent Isotropic Displacement Parameters of the non-Hydrogen atoms (continued)  
For [8,8-(PPh<sub>3</sub>)<sub>2</sub>-nido-8,7-RhNB<sub>9</sub>H<sub>11</sub>] (1)

| Atom  | x          | y          | z         | U(eq) [Ang <sup>2</sup> ] |
|-------|------------|------------|-----------|---------------------------|
| ----  | ---        | ---        | ---       | -----                     |
| *Cl2S | 0.3461(11) | -0.0610(9) | 0.4878(6) | 0.154(3)                  |
| *Cl3S | 0.5393(11) | 0.0854(9)  | 0.4426(6) | 0.158(3)                  |

U(eq) = 1/3 of the trace of the orthogonalized U Tensor

Starred Atom sites have a S.O.F less than 1.0

- 6 -

Table S3 - Hydrogen Atom Positions and Isotropic Displacement Parameters  
For [8,8-(PPh<sub>3</sub>)<sub>2</sub>-nido-8,7-RhNB<sub>9</sub>H<sub>11</sub>] (1)

| Atom | x         | y        | z          | U(iso) [Ang <sup>2</sup> ] |
|------|-----------|----------|------------|----------------------------|
| ---- | ---       | ---      | ---        | -----                      |
| H1   | 0.150(4)  | 0.739(3) | 0.1857(19) | 0.029(9)                   |
| H2   | 0.105(4)  | 0.708(3) | 0.351(2)   | 0.036(10)                  |
| H3   | -0.040(4) | 0.520(3) | 0.2345(18) | 0.025(8)                   |
| H4   | 0.139(4)  | 0.530(3) | 0.109(2)   | 0.034(9)                   |
| H5   | 0.425(4)  | 0.705(3) | 0.161(2)   | 0.032(9)                   |
| H6   | 0.408(4)  | 0.801(4) | 0.312(2)   | 0.050(11)                  |
| H7   | 0.090(4)  | 0.499(3) | 0.357(2)   | 0.036(10)                  |
| H9   | 0.411(4)  | 0.447(3) | 0.171(2)   | 0.042(10)                  |
| H10  | 0.545(4)  | 0.624(3) | 0.2970(19) | 0.029(9)                   |
| H11  | 0.327(4)  | 0.604(3) | 0.414(2)   | 0.043(10)                  |
| H112 | -0.10190  | 0.36240  | 0.09150    | 0.0400                     |
| H113 | -0.34910  | 0.30320  | 0.05940    | 0.0560                     |
| H114 | -0.47420  | 0.10640  | 0.05670    | 0.0640                     |
| H115 | -0.35260  | -0.03040 | 0.08590    | 0.0610                     |
| H116 | -0.10340  | 0.02540  | 0.11440    | 0.0410                     |
| H122 | 0.10420   | 0.03350  | 0.05240    | 0.0360                     |
| H123 | 0.21850   | -0.11060 | 0.07580    | 0.0450                     |
| H124 | 0.39060   | -0.08420 | 0.17960    | 0.0450                     |
| H125 | 0.44900   | 0.08680  | 0.25990    | 0.0410                     |
| H126 | 0.32670   | 0.22770  | 0.24030    | 0.0310                     |

|      |          |         |          |        |
|------|----------|---------|----------|--------|
| H132 | 0.38810  | 0.29700 | 0.07290  | 0.0370 |
| H133 | 0.48980  | 0.36450 | -0.03640 | 0.0450 |
| H134 | 0.35070  | 0.41290 | -0.13580 | 0.0470 |
| H135 | 0.11020  | 0.39580 | -0.12510 | 0.0510 |
| H136 | 0.00710  | 0.33110 | -0.01530 | 0.0400 |
| H212 | -0.03570 | 0.12700 | 0.45500  | 0.0420 |

- 7 -

Table S3 - Hydrogen Atom Positions and Isotropic Displacement Parameters (continued)  
For [8,8-(PPh3)2-nido-8,7-RhNB9H11] (1)

| Atom | x        | y        | z        | U(iso) [Ang <sup>2</sup> ] |
|------|----------|----------|----------|----------------------------|
| ---- | ---      | ---      | ---      | -----                      |
| H213 | 0.09620  | 0.13310  | 0.57190  | 0.0520                     |
| H214 | 0.33280  | 0.24930  | 0.59280  | 0.0500                     |
| H215 | 0.43670  | 0.36050  | 0.49820  | 0.0460                     |
| H216 | 0.30620  | 0.35570  | 0.38090  | 0.0330                     |
| H222 | 0.11680  | 0.04400  | 0.29280  | 0.0380                     |
| H223 | 0.01750  | -0.15500 | 0.25940  | 0.0550                     |
| H224 | -0.22980 | -0.23260 | 0.24160  | 0.0580                     |
| H225 | -0.37770 | -0.11290 | 0.26040  | 0.0570                     |
| H226 | -0.28000 | 0.08620  | 0.29270  | 0.0420                     |
| H232 | -0.23590 | 0.27250  | 0.23680  | 0.0360                     |
| H233 | -0.40500 | 0.37220  | 0.26190  | 0.0470                     |
| H234 | -0.38950 | 0.47420  | 0.38000  | 0.0530                     |
| H235 | -0.21380 | 0.46830  | 0.47510  | 0.0500                     |
| H236 | -0.04910 | 0.36260  | 0.45310  | 0.0370                     |
| H910 | 0.374(4) | 0.498(3) | 0.282(2) | 0.041(10)                  |

=====

The Temperature Factor has the Form of  $\text{Exp}(-T)$  Where  
 $T = 8 * (\text{Pi} ** 2) * U * (\text{Sin}(\text{Theta}) / \text{Lambda}) ** 2$  for Isotropic Atoms

- 8 -

Table S4 - (An)isotropic Displacement Parameters  
For [8,8-(PPh3)2-nido-8,7-RhNB9H11] (1)

| Atom | U(1,1) or U | U(2,2)     | U(3,3)     | U(2,3)      | U(1,3)      | U(1,2)      |
|------|-------------|------------|------------|-------------|-------------|-------------|
| ---- | -----       | -----      | -----      | -----       | -----       | -----       |
| Rh8  | 0.0171(1)   | 0.0155(1)  | 0.0163(1)  | 0.0016(1)   | 0.0021(1)   | 0.0026(1)   |
| P1   | 0.0151(3)   | 0.0209(4)  | 0.0174(4)  | 0.0004(3)   | 0.0007(3)   | 0.0034(3)   |
| P2   | 0.0161(3)   | 0.0185(4)  | 0.0185(4)  | 0.0023(3)   | 0.0022(3)   | 0.0029(3)   |
| N7   | 0.0327(14)  | 0.0186(12) | 0.0208(13) | 0.0014(10)  | 0.0088(11)  | 0.0036(11)  |
| C111 | 0.0171(14)  | 0.0393(18) | 0.0167(14) | -0.0033(12) | 0.0016(11)  | 0.0015(13)  |
| C112 | 0.0225(16)  | 0.048(2)   | 0.0294(17) | -0.0036(15) | -0.0002(13) | 0.0111(14)  |
| C113 | 0.0235(18)  | 0.080(3)   | 0.039(2)   | -0.001(2)   | 0.0013(15)  | 0.0182(19)  |
| C114 | 0.0198(17)  | 0.099(4)   | 0.034(2)   | 0.004(2)    | 0.0004(15)  | 0.003(2)    |
| C115 | 0.035(2)    | 0.064(3)   | 0.032(2)   | 0.0019(18)  | 0.0047(16)  | -0.0211(19) |
| C116 | 0.0309(17)  | 0.0419(19) | 0.0206(16) | 0.0014(14)  | 0.0010(13)  | -0.0055(15) |
| C121 | 0.0235(14)  | 0.0228(15) | 0.0211(14) | 0.0049(11)  | 0.0076(11)  | 0.0077(12)  |
| C122 | 0.0401(18)  | 0.0251(16) | 0.0248(16) | 0.0008(13)  | 0.0063(14)  | 0.0078(14)  |
| C123 | 0.047(2)    | 0.0248(17) | 0.043(2)   | 0.0029(14)  | 0.0165(17)  | 0.0112(15)  |
| C124 | 0.0379(19)  | 0.0315(18) | 0.053(2)   | 0.0186(16)  | 0.0194(17)  | 0.0184(15)  |
| C125 | 0.0254(16)  | 0.0410(19) | 0.0399(19) | 0.0163(15)  | 0.0053(14)  | 0.0124(14)  |
| C126 | 0.0228(15)  | 0.0275(16) | 0.0275(16) | 0.0026(12)  | 0.0042(12)  | 0.0054(12)  |
| C131 | 0.0218(14)  | 0.0222(14) | 0.0196(14) | 0.0012(11)  | 0.0029(11)  | 0.0032(11)  |
| C132 | 0.0230(15)  | 0.046(2)   | 0.0257(16) | 0.0060(14)  | 0.0029(12)  | 0.0118(14)  |
| C133 | 0.0277(17)  | 0.055(2)   | 0.0303(18) | 0.0059(16)  | 0.0091(14)  | 0.0087(16)  |
| C134 | 0.038(2)    | 0.051(2)   | 0.0245(17) | 0.0084(15)  | 0.0095(14)  | 0.0019(16)  |
| C135 | 0.043(2)    | 0.058(2)   | 0.0265(18) | 0.0150(17)  | -0.0010(15) | 0.0129(18)  |
| C136 | 0.0254(16)  | 0.048(2)   | 0.0278(17) | 0.0090(15)  | 0.0013(13)  | 0.0123(15)  |
| C211 | 0.0242(15)  | 0.0225(15) | 0.0233(15) | 0.0021(12)  | 0.0003(12)  | 0.0082(12)  |
| C212 | 0.0337(18)  | 0.042(2)   | 0.0289(17) | 0.0096(15)  | 0.0030(14)  | 0.0074(15)  |
| C213 | 0.057(2)    | 0.048(2)   | 0.0255(18) | 0.0101(16)  | 0.0029(16)  | 0.0162(19)  |
| C214 | 0.056(2)    | 0.042(2)   | 0.0261(17) | -0.0024(15) | -0.0138(16) | 0.0189(18)  |

- 9 -

Table S4 - (An)isotropic Displacement Parameters (continued)  
For [8,8-(PPh<sub>3</sub>)<sub>2</sub>-nido-8,7-RhNB<sub>9</sub>H<sub>11</sub>] (1)



| Atom | U(1,1) or U | U(2,2)     | U(3,3)     | U(2,3)      | U(1,3)      | U(1,2)      |
|------|-------------|------------|------------|-------------|-------------|-------------|
| ---- | -----       | -----      | -----      | -----       | -----       | -----       |
| C215 | 0.0363(19)  | 0.0354(19) | 0.038(2)   | -0.0044(15) | -0.0137(15) | 0.0073(15)  |
| C216 | 0.0261(16)  | 0.0266(16) | 0.0290(16) | 0.0009(13)  | -0.0023(13) | 0.0059(13)  |
| C221 | 0.0246(15)  | 0.0206(14) | 0.0202(14) | 0.0032(11)  | 0.0051(12)  | 0.0021(12)  |
| C222 | 0.0353(18)  | 0.0258(16) | 0.0371(18) | 0.0083(14)  | 0.0160(14)  | 0.0071(14)  |
| C223 | 0.072(3)    | 0.0265(18) | 0.046(2)   | 0.0086(16)  | 0.027(2)    | 0.0183(18)  |
| C224 | 0.072(3)    | 0.0218(17) | 0.041(2)   | 0.0000(15)  | 0.0115(19)  | -0.0065(18) |
| C225 | 0.039(2)    | 0.037(2)   | 0.053(2)   | 0.0051(17)  | -0.0024(18) | -0.0124(17) |
| C226 | 0.0264(16)  | 0.0319(18) | 0.0407(19) | 0.0040(15)  | 0.0017(14)  | 0.0002(14)  |
| C231 | 0.0178(14)  | 0.0231(15) | 0.0288(16) | 0.0060(12)  | 0.0073(12)  | 0.0038(11)  |
| C232 | 0.0250(16)  | 0.0352(18) | 0.0308(17) | 0.0058(14)  | 0.0044(13)  | 0.0097(13)  |
| C233 | 0.0252(17)  | 0.040(2)   | 0.055(2)   | 0.0133(17)  | 0.0051(16)  | 0.0134(15)  |
| C234 | 0.0350(19)  | 0.046(2)   | 0.060(3)   | 0.0094(18)  | 0.0195(18)  | 0.0221(17)  |
| C235 | 0.047(2)    | 0.042(2)   | 0.042(2)   | -0.0003(16) | 0.0200(17)  | 0.0189(17)  |
| C236 | 0.0309(17)  | 0.0331(17) | 0.0296(17) | 0.0027(14)  | 0.0078(13)  | 0.0095(14)  |
| B1   | 0.0284(18)  | 0.0210(17) | 0.0290(18) | 0.0047(14)  | 0.0078(14)  | 0.0077(14)  |
| B2   | 0.037(2)    | 0.0185(17) | 0.034(2)   | -0.0002(14) | 0.0115(16)  | 0.0052(14)  |
| B3   | 0.0219(17)  | 0.0218(16) | 0.0292(18) | 0.0032(13)  | 0.0083(14)  | 0.0073(13)  |
| B4   | 0.0227(16)  | 0.0213(16) | 0.0223(17) | 0.0037(13)  | 0.0044(13)  | 0.0051(13)  |
| B5   | 0.0256(17)  | 0.0201(16) | 0.0292(18) | 0.0029(14)  | 0.0066(14)  | 0.0024(13)  |
| B6   | 0.037(2)    | 0.0197(17) | 0.0299(19) | -0.0008(14) | 0.0041(16)  | 0.0027(15)  |
| B9   | 0.0201(16)  | 0.0228(17) | 0.0278(18) | 0.0021(14)  | 0.0024(13)  | 0.0030(13)  |
| B10  | 0.0225(18)  | 0.0261(18) | 0.036(2)   | 0.0000(15)  | -0.0033(15) | 0.0016(14)  |
| B11  | 0.039(2)    | 0.0233(18) | 0.0266(19) | -0.0025(14) | -0.0008(15) | 0.0043(15)  |

=====

The Temperature Factor has the Form of  $\text{Exp}(-T)$  Where  
 $T = 8 * (\text{Pi}^{**2}) * U * (\text{Sin}(\text{Theta}) / \text{Lambda})^{**2}$  for Isotropic Atoms  
 $T = 2 * (\text{Pi}^{**2}) * \text{Sum}ij(h(i) * h(j) * U(i, j) * \text{Astar}(i) * \text{Astar}(j))$ , for  
Anisotropic Atoms.  $\text{Astar}(i)$  are Reciprocal Axial Lengths and  
 $h(i)$  are the Reflection Indices.

Table S5 - Bond Distances (Angstrom)  
For [8,8-(PPh3)2-nido-8,7-RhNB9H11] (1)

|      |         |           |      |       |          |
|------|---------|-----------|------|-------|----------|
| Rh8  | -P1     | 2.2331(8) | C125 | -C126 | 1.390(5) |
| Rh8  | -P2     | 2.4166(8) | C131 | -C132 | 1.395(4) |
| Rh8  | -N7     | 2.231(2)  | C131 | -C136 | 1.393(4) |
| Rh8  | -B3     | 2.208(4)  | C132 | -C133 | 1.387(5) |
| Rh8  | -B4     | 2.230(3)  | C133 | -C134 | 1.377(5) |
| Rh8  | -B9     | 2.204(4)  | C134 | -C135 | 1.376(6) |
| C12S | -C13S_a | 1.687(15) | C135 | -C136 | 1.391(5) |
| P1   | -C111   | 1.828(3)  | C211 | -C216 | 1.394(4) |
| P1   | -C131   | 1.839(3)  | C211 | -C212 | 1.395(4) |
| P1   | -C121   | 1.822(3)  | C112 | -H112 | 0.9500   |
| P2   | -C211   | 1.827(3)  | C212 | -C213 | 1.385(5) |
| P2   | -C231   | 1.833(3)  | C113 | -H113 | 0.9500   |
| P2   | -C221   | 1.831(2)  | C213 | -C214 | 1.385(5) |
| N7   | -B2     | 1.664(4)  | C214 | -C215 | 1.373(5) |
| N7   | -B3     | 1.597(4)  | C114 | -H114 | 0.9500   |
| N7   | -B11    | 1.545(5)  | C215 | -C216 | 1.389(5) |
| N7   | -H7     | 0.87(4)   | C115 | -H115 | 0.9500   |
| C111 | -C112   | 1.403(5)  | C116 | -H116 | 0.9500   |
| C111 | -C116   | 1.391(5)  | C221 | -C226 | 1.387(5) |
| C112 | -C113   | 1.390(5)  | C221 | -C222 | 1.391(5) |
| C113 | -C114   | 1.376(6)  | C122 | -H122 | 0.9500   |
| C114 | -C115   | 1.379(6)  | C222 | -C223 | 1.387(5) |
| C115 | -C116   | 1.399(6)  | C123 | -H123 | 0.9500   |
| C121 | -C122   | 1.393(4)  | C223 | -C224 | 1.375(7) |
| C121 | -C126   | 1.392(4)  | C124 | -H124 | 0.9500   |
| C122 | -C123   | 1.382(5)  | C224 | -C225 | 1.373(6) |
| C123 | -C124   | 1.384(5)  | C225 | -C226 | 1.384(5) |
| C124 | -C125   | 1.380(5)  | C125 | -H125 | 0.9500   |

Table S5 - Bond Distances (Angstrom) (continued)  
 For [8,8-(PPh3)2-nido-8,7-RhNB9H11] (1)

|      |       |          |     |       |          |
|------|-------|----------|-----|-------|----------|
| C126 | -H126 | 0.9500   | B1  | -B4   | 1.788(5) |
| C231 | -C232 | 1.396(4) | B1  | -B5   | 1.788(6) |
| C231 | -C236 | 1.399(4) | B1  | -B6   | 1.812(5) |
| C132 | -H132 | 0.9500   | B1  | -B2   | 1.759(5) |
| C232 | -C233 | 1.391(5) | B2  | -B3   | 1.829(5) |
| C233 | -C234 | 1.383(5) | B2  | -B6   | 1.734(6) |
| C133 | -H133 | 0.9500   | B2  | -B11  | 1.787(5) |
| C234 | -C235 | 1.376(5) | B3  | -B4   | 1.840(5) |
| C134 | -H134 | 0.9500   | B4  | -B5   | 1.783(5) |
| C235 | -C236 | 1.394(5) | B4  | -B9   | 1.761(6) |
| C135 | -H135 | 0.9500   | B5  | -B9   | 1.766(5) |
| C136 | -H136 | 0.9500   | B5  | -B10  | 1.779(5) |
| C212 | -H212 | 0.9500   | B5  | -B6   | 1.800(5) |
| C213 | -H213 | 0.9500   | B6  | -B11  | 1.739(5) |
| C214 | -H214 | 0.9500   | B6  | -B10  | 1.766(5) |
| C215 | -H215 | 0.9500   | B9  | -B10  | 1.835(5) |
| C216 | -H216 | 0.9500   | B10 | -B11  | 1.882(5) |
| C222 | -H222 | 0.9500   | B1  | -H1   | 1.10(4)  |
| C223 | -H223 | 0.9500   | B2  | -H2   | 1.10(4)  |
| C224 | -H224 | 0.9500   | B3  | -H3   | 1.05(4)  |
| C225 | -H225 | 0.9500   | B4  | -H4   | 1.09(4)  |
| C226 | -H226 | 0.9500   | B5  | -H5   | 1.11(4)  |
| C232 | -H232 | 0.9500   | B6  | -H6   | 1.13(5)  |
| C233 | -H233 | 0.9500   | B9  | -H9   | 1.17(4)  |
| C234 | -H234 | 0.9500   | B9  | -H910 | 1.45(4)  |
| C235 | -H235 | 0.9500   | B10 | -H910 | 1.21(3)  |
| C236 | -H236 | 0.9500   | B10 | -H10  | 1.09(4)  |
| B1   | -B3   | 1.763(5) | B11 | -H11  | 1.09(4)  |

Table S6 - Bond Angles (Degrees)  
For [8,8-(PPh<sub>3</sub>)<sub>2</sub>-nido-8,7-RhNB<sub>9</sub>H<sub>11</sub>] (1)

|      |      |       |            |      |       |       |           |
|------|------|-------|------------|------|-------|-------|-----------|
| P1   | -Rh8 | -P2   | 97.64(3)   | Rh8  | -N7   | -B3   | 68.16(15) |
| P1   | -Rh8 | -N7   | 170.61(7)  | Rh8  | -N7   | -B11  | 116.2(2)  |
| P1   | -Rh8 | -B3   | 128.54(9)  | B2   | -N7   | -B3   | 68.2(2)   |
| P1   | -Rh8 | -B4   | 93.31(9)   | B2   | -N7   | -B11  | 67.6(2)   |
| P1   | -Rh8 | -B9   | 91.57(9)   | B3   | -N7   | -B11  | 120.3(2)  |
| P2   | -Rh8 | -N7   | 88.82(7)   | B2   | -N7   | -H7   | 111(2)    |
| P2   | -Rh8 | -B3   | 111.61(10) | B3   | -N7   | -H7   | 116(3)    |
| P2   | -Rh8 | -B4   | 159.80(10) | B11  | -N7   | -H7   | 116(2)    |
| P2   | -Rh8 | -B9   | 148.90(10) | Rh8  | -N7   | -H7   | 111(2)    |
| N7   | -Rh8 | -B3   | 42.17(11)  | P1   | -C111 | -C116 | 125.5(3)  |
| N7   | -Rh8 | -B4   | 78.57(11)  | P1   | -C111 | -C112 | 115.5(3)  |
| N7   | -Rh8 | -B9   | 86.29(12)  | C112 | -C111 | -C116 | 118.9(3)  |
| B3   | -Rh8 | -B4   | 48.99(14)  | C111 | -C112 | -C113 | 120.9(3)  |
| B3   | -Rh8 | -B9   | 84.48(14)  | C112 | -C113 | -C114 | 119.9(4)  |
| B4   | -Rh8 | -B9   | 46.78(14)  | C113 | -C114 | -C115 | 119.8(4)  |
| Rh8  | -P1  | -C111 | 105.70(10) | C114 | -C115 | -C116 | 121.3(4)  |
| Rh8  | -P1  | -C121 | 113.78(9)  | C111 | -C116 | -C115 | 119.3(3)  |
| Rh8  | -P1  | -C131 | 122.33(8)  | P1   | -C121 | -C122 | 122.8(2)  |
| C111 | -P1  | -C121 | 110.38(14) | P1   | -C121 | -C126 | 118.1(2)  |
| C111 | -P1  | -C131 | 104.33(13) | C122 | -C121 | -C126 | 119.0(3)  |
| C121 | -P1  | -C131 | 99.78(13)  | C121 | -C122 | -C123 | 120.5(3)  |
| Rh8  | -P2  | -C211 | 113.82(9)  | C122 | -C123 | -C124 | 120.1(3)  |
| Rh8  | -P2  | -C221 | 128.66(10) | C123 | -C124 | -C125 | 120.1(3)  |
| Rh8  | -P2  | -C231 | 100.62(9)  | C124 | -C125 | -C126 | 120.0(3)  |
| C211 | -P2  | -C221 | 101.56(12) | C121 | -C126 | -C125 | 120.3(3)  |
| C211 | -P2  | -C231 | 104.04(13) | P1   | -C131 | -C132 | 118.5(2)  |
| C221 | -P2  | -C231 | 105.61(13) | P1   | -C131 | -C136 | 123.4(2)  |
| Rh8  | -N7  | -B2   | 129.17(18) | C132 | -C131 | -C136 | 118.1(3)  |

Table S6 - Bond Angles (Degrees) (continued)  
For [8,8-(PPh<sub>3</sub>)<sub>2</sub>-nido-8,7-RhNB<sub>9</sub>H<sub>11</sub>] (1)

|      |       |       |          |      |       |       |          |
|------|-------|-------|----------|------|-------|-------|----------|
| C131 | -C132 | -C133 | 120.9(3) | C221 | -C222 | -C223 | 120.8(4) |
| C132 | -C133 | -C134 | 120.2(4) | C222 | -C223 | -C224 | 119.9(4) |
| C133 | -C134 | -C135 | 119.6(3) | C122 | -C123 | -H123 | 120.00   |
| C134 | -C135 | -C136 | 120.6(3) | C124 | -C123 | -H123 | 120.00   |
| C131 | -C136 | -C135 | 120.5(3) | C123 | -C124 | -H124 | 120.00   |
| P2   | -C211 | -C212 | 120.6(2) | C223 | -C224 | -C225 | 120.0(3) |
| P2   | -C211 | -C216 | 120.4(2) | C125 | -C124 | -H124 | 120.00   |
| C212 | -C211 | -C216 | 119.1(3) | C224 | -C225 | -C226 | 120.4(4) |
| C211 | -C212 | -C213 | 120.3(3) | C126 | -C125 | -H125 | 120.00   |
| C111 | -C112 | -H112 | 120.00   | C124 | -C125 | -H125 | 120.00   |
| C113 | -C112 | -H112 | 120.00   | C125 | -C126 | -H126 | 120.00   |
| C112 | -C113 | -H113 | 120.00   | C121 | -C126 | -H126 | 120.00   |
| C212 | -C213 | -C214 | 119.9(3) | C221 | -C226 | -C225 | 120.6(3) |
| C114 | -C113 | -H113 | 120.00   | P2   | -C231 | -C236 | 122.3(2) |
| C113 | -C114 | -H114 | 120.00   | C232 | -C231 | -C236 | 118.9(3) |
| C115 | -C114 | -H114 | 120.00   | P2   | -C231 | -C232 | 118.3(2) |
| C213 | -C214 | -C215 | 120.3(3) | C231 | -C232 | -C233 | 120.5(3) |
| C214 | -C215 | -C216 | 120.3(3) | C131 | -C132 | -H132 | 120.00   |
| C114 | -C115 | -H115 | 119.00   | C133 | -C132 | -H132 | 120.00   |
| C116 | -C115 | -H115 | 119.00   | C232 | -C233 | -C234 | 120.1(3) |
| C211 | -C216 | -C215 | 120.1(3) | C134 | -C133 | -H133 | 120.00   |
| C111 | -C116 | -H116 | 120.00   | C132 | -C133 | -H133 | 120.00   |
| C115 | -C116 | -H116 | 120.00   | C233 | -C234 | -C235 | 120.0(4) |
| P2   | -C221 | -C226 | 124.1(2) | C135 | -C134 | -H134 | 120.00   |
| C222 | -C221 | -C226 | 118.4(3) | C133 | -C134 | -H134 | 120.00   |
| P2   | -C221 | -C222 | 117.5(2) | C134 | -C135 | -H135 | 120.00   |
| C121 | -C122 | -H122 | 120.00   | C234 | -C235 | -C236 | 120.6(3) |

|      |       |       |        |      |       |       |        |
|------|-------|-------|--------|------|-------|-------|--------|
| C123 | -C122 | -H122 | 120.00 | C136 | -C135 | -H135 | 120.00 |
|------|-------|-------|--------|------|-------|-------|--------|

- 14 -

Table S6 - Bond Angles (Degrees) (continued)  
For [8,8-(PPh<sub>3</sub>)<sub>2</sub>-nido-8,7-RhNB<sub>9</sub>H<sub>11</sub>] (1)

|      |       |       |          |      |       |       |           |
|------|-------|-------|----------|------|-------|-------|-----------|
| C231 | -C236 | -C235 | 119.9(3) | C233 | -C234 | -H234 | 120.00    |
| C131 | -C136 | -H136 | 120.00   | C234 | -C235 | -H235 | 120.00    |
| C135 | -C136 | -H136 | 120.00   | C236 | -C235 | -H235 | 120.00    |
| C211 | -C212 | -H212 | 120.00   | C231 | -C236 | -H236 | 120.00    |
| C213 | -C212 | -H212 | 120.00   | C235 | -C236 | -H236 | 120.00    |
| C212 | -C213 | -H213 | 120.00   | B2   | -B1   | -B3   | 62.6(2)   |
| C214 | -C213 | -H213 | 120.00   | B2   | -B1   | -B4   | 114.5(2)  |
| C213 | -C214 | -H214 | 120.00   | B2   | -B1   | -B5   | 110.8(3)  |
| C215 | -C214 | -H214 | 120.00   | B2   | -B1   | -B6   | 58.1(2)   |
| C214 | -C215 | -H215 | 120.00   | B3   | -B1   | -B4   | 62.4(2)   |
| C216 | -C215 | -H215 | 120.00   | B3   | -B1   | -B5   | 109.0(3)  |
| C211 | -C216 | -H216 | 120.00   | B3   | -B1   | -B6   | 104.6(2)  |
| C215 | -C216 | -H216 | 120.00   | B4   | -B1   | -B5   | 59.8(2)   |
| C221 | -C222 | -H222 | 120.00   | B4   | -B1   | -B6   | 106.9(3)  |
| C223 | -C222 | -H222 | 120.00   | B5   | -B1   | -B6   | 60.0(2)   |
| C224 | -C223 | -H223 | 120.00   | N7   | -B2   | -B1   | 101.2(2)  |
| C222 | -C223 | -H223 | 120.00   | N7   | -B2   | -B3   | 54.16(18) |
| C225 | -C224 | -H224 | 120.00   | N7   | -B2   | -B6   | 100.5(3)  |
| C223 | -C224 | -H224 | 120.00   | N7   | -B2   | -B11  | 53.04(19) |
| C224 | -C225 | -H225 | 120.00   | B1   | -B2   | -B6   | 62.5(2)   |
| C226 | -C225 | -H225 | 120.00   | B1   | -B2   | -B11  | 105.8(3)  |
| C225 | -C226 | -H226 | 120.00   | B3   | -B2   | -B6   | 105.1(3)  |
| C221 | -C226 | -H226 | 120.00   | B3   | -B2   | -B11  | 97.8(2)   |
| C231 | -C232 | -H232 | 120.00   | B6   | -B2   | -B11  | 59.2(2)   |
| C233 | -C232 | -H232 | 120.00   | B1   | -B2   | -B3   | 58.8(2)   |
| C232 | -C233 | -H233 | 120.00   | Rh8  | -B3   | -N7   | 69.68(16) |

|      |       |       |        |     |     |     |           |
|------|-------|-------|--------|-----|-----|-----|-----------|
| C234 | -C233 | -H233 | 120.00 | Rh8 | -B3 | -B1 | 118.4(2)  |
| C235 | -C234 | -H234 | 120.00 | Rh8 | -B3 | -B4 | 66.14(16) |

- 15 -

Table S6 - Bond Angles (Degrees) (continued)  
For [8,8-(PPh<sub>3</sub>)<sub>2</sub>-nido-8,7-RhNB<sub>9</sub>H<sub>11</sub>] (1)

|     |     |      |           |     |      |      |           |
|-----|-----|------|-----------|-----|------|------|-----------|
| N7  | -B3 | -B1  | 103.8(3)  | B1  | -B6  | -B10 | 108.0(2)  |
| Rh8 | -B3 | -B2  | 121.4(2)  | B1  | -B6  | -B2  | 59.5(2)   |
| N7  | -B3 | -B4  | 110.3(3)  | B2  | -B6  | -B5  | 111.4(3)  |
| B1  | -B3 | -B2  | 58.62(19) | B2  | -B6  | -B10 | 116.9(3)  |
| B1  | -B3 | -B4  | 59.5(2)   | B1  | -B6  | -B11 | 105.6(3)  |
| B2  | -B3 | -B4  | 108.8(3)  | B5  | -B6  | -B10 | 59.8(2)   |
| N7  | -B3 | -B2  | 57.63(18) | B5  | -B6  | -B11 | 110.1(2)  |
| Rh8 | -B4 | -B1  | 116.1(2)  | B10 | -B6  | -B11 | 64.9(2)   |
| Rh8 | -B4 | -B3  | 64.88(15) | B2  | -B6  | -B11 | 62.0(2)   |
| Rh8 | -B4 | -B9  | 65.85(16) | Rh8 | -B9  | -B5  | 117.9(2)  |
| B1  | -B4 | -B3  | 58.1(2)   | Rh8 | -B9  | -B10 | 110.0(2)  |
| B1  | -B4 | -B5  | 60.1(2)   | Rh8 | -B9  | -B4  | 67.37(17) |
| B1  | -B4 | -B9  | 110.1(3)  | B4  | -B9  | -B10 | 106.2(2)  |
| B3  | -B4 | -B5  | 105.8(2)  | B5  | -B9  | -B10 | 59.16(19) |
| B3  | -B4 | -B9  | 110.9(2)  | B4  | -B9  | -B5  | 60.7(2)   |
| B5  | -B4 | -B9  | 59.8(2)   | B5  | -B10 | -B6  | 61.1(2)   |
| Rh8 | -B4 | -B5  | 115.9(2)  | B5  | -B10 | -B9  | 58.50(19) |
| B1  | -B5 | -B6  | 60.6(2)   | B6  | -B10 | -B9  | 108.6(3)  |
| B1  | -B5 | -B9  | 109.9(3)  | B6  | -B10 | -B11 | 56.9(2)   |
| B1  | -B5 | -B10 | 108.5(3)  | B5  | -B10 | -B11 | 104.8(3)  |
| B4  | -B5 | -B6  | 107.6(3)  | B9  | -B10 | -B11 | 108.1(3)  |
| B4  | -B5 | -B9  | 59.5(2)   | N7  | -B11 | -B6  | 105.2(3)  |
| B4  | -B5 | -B10 | 107.7(2)  | N7  | -B11 | -B10 | 111.3(2)  |
| B1  | -B5 | -B4  | 60.1(2)   | N7  | -B11 | -B2  | 59.4(2)   |
| B6  | -B5 | -B10 | 59.1(2)   | B2  | -B11 | -B10 | 108.7(2)  |

|    |     |      |          |    |      |      |           |
|----|-----|------|----------|----|------|------|-----------|
| B9 | -B5 | -B10 | 62.3(2)  | B6 | -B11 | -B10 | 58.2(2)   |
| B6 | -B5 | -B9  | 110.1(2) | B2 | -B11 | -B6  | 58.9(2)   |
| B1 | -B6 | -B5  | 59.3(2)  | B2 | -B1  | -H1  | 119.1(19) |

- 16 -

Table S6 - Bond Angles (Degrees) (continued)  
For [8,8-(PPh<sub>3</sub>)<sub>2</sub>-nido-8,7-RhNB<sub>9</sub>H<sub>11</sub>] (1)

|     |     |     |           |     |      |       |           |
|-----|-----|-----|-----------|-----|------|-------|-----------|
| B3  | -B1 | -H1 | 122(2)    | B5  | -B6  | -H6   | 121.6(19) |
| B4  | -B1 | -H1 | 118.6(18) | B10 | -B6  | -H6   | 116(2)    |
| B5  | -B1 | -H1 | 120(2)    | B11 | -B6  | -H6   | 119.2(19) |
| B6  | -B1 | -H1 | 125.6(19) | Rh8 | -B9  | -H9   | 114.4(18) |
| N7  | -B2 | -H2 | 116.4(18) | Rh8 | -B9  | -H910 | 79.3(15)  |
| B1  | -B2 | -H2 | 131.0(19) | B4  | -B9  | -H9   | 132.5(18) |
| B3  | -B2 | -H2 | 121(2)    | B4  | -B9  | -H910 | 119.1(16) |
| B6  | -B2 | -H2 | 132(2)    | B5  | -B9  | -H9   | 125.1(18) |
| B11 | -B2 | -H2 | 121.5(19) | B5  | -B9  | -H910 | 97.6(14)  |
| Rh8 | -B3 | -H3 | 105.4(19) | B10 | -B9  | -H9   | 115.7(18) |
| N7  | -B3 | -H3 | 118.5(18) | B10 | -B9  | -H910 | 41.4(14)  |
| B1  | -B3 | -H3 | 127.3(19) | H9  | -B9  | -H910 | 107(2)    |
| B2  | -B3 | -H3 | 120.5(19) | B5  | -B10 | -H10  | 123.0(18) |
| B4  | -B3 | -H3 | 123.4(18) | B5  | -B10 | -H910 | 106.8(17) |
| Rh8 | -B4 | -H4 | 116.4(18) | B6  | -B10 | -H10  | 119.8(19) |
| B1  | -B4 | -H4 | 113.3(19) | B6  | -B10 | -H910 | 124.1(19) |
| B3  | -B4 | -H4 | 117(2)    | B9  | -B10 | -H10  | 123.2(18) |
| B5  | -B4 | -H4 | 122(2)    | B9  | -B10 | -H910 | 51.9(17)  |
| B9  | -B4 | -H4 | 127(2)    | B11 | -B10 | -H10  | 122.2(18) |
| B1  | -B5 | -H5 | 119(2)    | B11 | -B10 | -H910 | 78.9(18)  |
| B4  | -B5 | -H5 | 126.9(19) | H10 | -B10 | -H910 | 112(3)    |
| B6  | -B5 | -H5 | 116.2(18) | N7  | -B11 | -H11  | 116(2)    |
| B9  | -B5 | -H5 | 124.1(19) | B2  | -B11 | -H11  | 123(2)    |
| B10 | -B5 | -H5 | 120(2)    | B6  | -B11 | -H11  | 131.2(19) |



|    |     |     |        |     |      |      |        |
|----|-----|-----|--------|-----|------|------|--------|
| B1 | -B6 | -H6 | 127(2) | B10 | -B11 | -H11 | 123(2) |
| B2 | -B6 | -H6 | 118(2) |     |      |      |        |

- 17 -

Table S7 - Torsion Angles (Degrees)  
For [8,8-(PPh<sub>3</sub>)<sub>2</sub>-nido-8,7-RhNB<sub>9</sub>H<sub>11</sub>] (1)

|    |      |     |       |             |
|----|------|-----|-------|-------------|
| P2 | -Rh8 | -P1 | -C111 | 61.24(11)   |
| P2 | -Rh8 | -P1 | -C121 | -60.04(10)  |
| P2 | -Rh8 | -P1 | -C131 | -179.94(12) |
| B3 | -Rh8 | -P1 | -C111 | -64.35(17)  |
| B3 | -Rh8 | -P1 | -C121 | 174.39(16)  |
| B3 | -Rh8 | -P1 | -C131 | 54.48(18)   |
| B4 | -Rh8 | -P1 | -C111 | -101.75(15) |
| B4 | -Rh8 | -P1 | -C121 | 136.98(14)  |
| B4 | -Rh8 | -P1 | -C131 | 17.08(16)   |
| B9 | -Rh8 | -P1 | -C111 | -148.54(15) |
| B9 | -Rh8 | -P1 | -C121 | 90.19(14)   |
| B9 | -Rh8 | -P1 | -C131 | -29.72(15)  |
| P1 | -Rh8 | -P2 | -C211 | 126.41(10)  |
| P1 | -Rh8 | -P2 | -C221 | -2.90(13)   |
| P1 | -Rh8 | -P2 | -C231 | -122.94(10) |
| N7 | -Rh8 | -P2 | -C211 | -60.42(12)  |
| N7 | -Rh8 | -P2 | -C221 | 170.27(15)  |
| N7 | -Rh8 | -P2 | -C231 | 50.22(12)   |
| B3 | -Rh8 | -P2 | -C211 | -96.76(14)  |
| B3 | -Rh8 | -P2 | -C221 | 133.93(16)  |
| B3 | -Rh8 | -P2 | -C231 | 13.89(14)   |
| B4 | -Rh8 | -P2 | -C211 | -111.4(3)   |
| B4 | -Rh8 | -P2 | -C221 | 119.3(3)    |
| B4 | -Rh8 | -P2 | -C231 | -0.7(3)     |
| B9 | -Rh8 | -P2 | -C211 | 20.4(2)     |

|    |      |     |       |           |
|----|------|-----|-------|-----------|
| B9 | -Rh8 | -P2 | -C221 | -108.9(2) |
| B9 | -Rh8 | -P2 | -C231 | 131.0(2)  |
| P1 | -Rh8 | -B4 | -B1   | 169.4(2)  |

- 18 -

Table S7 - Torsion Angles (Degrees) (continued)  
For [8,8-(PPh3)2-nido-8,7-RhNB9H11] (1)

|    |      |     |     |             |
|----|------|-----|-----|-------------|
| P2 | -Rh8 | -B4 | -B1 | 46.5(4)     |
| N7 | -Rh8 | -B4 | -B1 | -5.8(2)     |
| B3 | -Rh8 | -B4 | -B1 | 28.4(2)     |
| B9 | -Rh8 | -B4 | -B1 | -101.5(3)   |
| P1 | -Rh8 | -B4 | -B3 | 140.97(15)  |
| P2 | -Rh8 | -B4 | -B3 | 18.1(4)     |
| N7 | -Rh8 | -B4 | -B3 | -34.28(16)  |
| B9 | -Rh8 | -B4 | -B3 | -130.0(2)   |
| P1 | -Rh8 | -B4 | -B5 | -122.9(2)   |
| P2 | -Rh8 | -B4 | -B5 | 114.2(3)    |
| N7 | -Rh8 | -B4 | -B5 | 61.9(2)     |
| B3 | -Rh8 | -B4 | -B5 | 96.1(3)     |
| B9 | -Rh8 | -B4 | -B5 | -33.9(2)    |
| P1 | -Rh8 | -B4 | -B9 | -89.05(15)  |
| P2 | -Rh8 | -B4 | -B9 | 148.1(2)    |
| N7 | -Rh8 | -B4 | -B9 | 95.70(17)   |
| B3 | -Rh8 | -B4 | -B9 | 130.0(2)    |
| P1 | -Rh8 | -B9 | -B4 | 93.06(15)   |
| P2 | -Rh8 | -B9 | -B4 | -159.30(15) |
| N7 | -Rh8 | -B9 | -B4 | -77.79(16)  |
| P2 | -Rh8 | -N7 | -B2 | -157.5(3)   |
| B3 | -Rh8 | -N7 | -B2 | -32.6(3)    |
| P1 | -Rh8 | -B3 | -N7 | -178.17(11) |
| P2 | -Rh8 | -B3 | -N7 | 61.94(17)   |

|    |      |     |     |            |
|----|------|-----|-----|------------|
| B4 | -Rh8 | -B3 | -N7 | -124.7(2)  |
| B9 | -Rh8 | -B3 | -N7 | -90.56(18) |
| P1 | -Rh8 | -B3 | -B1 | -83.0(3)   |
| P2 | -Rh8 | -B3 | -B1 | 157.1(2)   |

- 19 -

Table S7 - Torsion Angles (Degrees) (continued)  
for[8,8-(PPh3)2-nido-8,7-RhNB9H11] (1)

|    |      |     |      |             |
|----|------|-----|------|-------------|
| N7 | -Rh8 | -B3 | -B1  | 95.1(3)     |
| B4 | -Rh8 | -B3 | -B1  | -29.6(2)    |
| B9 | -Rh8 | -B3 | -B1  | 4.6(2)      |
| P1 | -Rh8 | -B3 | -B2  | -151.70(19) |
| P2 | -Rh8 | -N7 | -B3  | -124.85(17) |
| B4 | -Rh8 | -N7 | -B3  | 39.28(19)   |
| B9 | -Rh8 | -N7 | -B3  | 85.88(19)   |
| P2 | -Rh8 | -B3 | -B2  | 88.4(2)     |
| N7 | -Rh8 | -B3 | -B2  | 26.5(2)     |
| B4 | -Rh8 | -N7 | -B2  | 6.6(3)      |
| B9 | -Rh8 | -N7 | -B2  | 53.3(3)     |
| B4 | -Rh8 | -B9 | -B10 | 99.8(3)     |
| P2 | -Rh8 | -B9 | -B5  | -124.4(2)   |
| N7 | -Rh8 | -B9 | -B5  | -42.9(2)    |
| P2 | -Rh8 | -N7 | -B11 | 121.0(2)    |
| B3 | -Rh8 | -N7 | -B11 | -114.1(3)   |
| B4 | -Rh8 | -N7 | -B11 | -74.9(2)    |
| B9 | -Rh8 | -N7 | -B11 | -28.3(2)    |
| P1 | -Rh8 | -B9 | -B5  | 128.0(2)    |
| B3 | -Rh8 | -B9 | -B10 | 64.3(2)     |
| B4 | -Rh8 | -B3 | -B2  | -98.2(3)    |
| B3 | -Rh8 | -B9 | -B5  | -0.6(2)     |
| B4 | -Rh8 | -B9 | -B5  | 34.9(2)     |

|    |      |     |      |             |
|----|------|-----|------|-------------|
| P1 | -Rh8 | -B9 | -B10 | -167.1(2)   |
| B3 | -Rh8 | -B9 | -B4  | -35.51(17)  |
| N7 | -Rh8 | -B9 | -B10 | 22.0(2)     |
| P1 | -Rh8 | -B3 | -B4  | -53.5(2)    |
| P2 | -Rh8 | -B3 | -B4  | -173.38(14) |

- 20 -

Table S7 - Torsion Angles (Degrees) (continued)  
for [8,8-(PPh<sub>3</sub>)<sub>2</sub>-nido-8,7-RhNB<sub>9</sub>H<sub>11</sub>] (1)

|      |      |       |       |           |
|------|------|-------|-------|-----------|
| B9   | -Rh8 | -B3   | -B2   | -64.1(3)  |
| B9   | -Rh8 | -B3   | -B4   | 34.13(17) |
| P2   | -Rh8 | -B9   | -B10  | -59.5(3)  |
| N7   | -Rh8 | -B3   | -B4   | 124.7(2)  |
| Rh8  | -P1  | -C111 | -C116 | -117.8(3) |
| C111 | -P1  | -C131 | -C136 | 24.4(3)   |
| C131 | -P1  | -C111 | -C116 | 112.0(3)  |
| C121 | -P1  | -C131 | -C132 | -42.0(2)  |
| Rh8  | -P1  | -C111 | -C112 | 58.4(2)   |
| C111 | -P1  | -C131 | -C132 | -156.2(2) |
| C111 | -P1  | -C121 | -C122 | 46.2(3)   |
| C121 | -P1  | -C111 | -C112 | -178.1(2) |
| Rh8  | -P1  | -C131 | -C132 | 84.4(2)   |
| C111 | -P1  | -C121 | -C126 | -138.7(2) |
| C121 | -P1  | -C131 | -C136 | 138.5(2)  |
| Rh8  | -P1  | -C131 | -C136 | -95.1(2)  |
| C131 | -P1  | -C111 | -C112 | -71.8(2)  |
| Rh8  | -P1  | -C121 | -C126 | -20.1(3)  |
| Rh8  | -P1  | -C121 | -C122 | 164.8(2)  |
| C121 | -P1  | -C111 | -C116 | 5.6(3)    |
| C131 | -P1  | -C121 | -C122 | -63.2(3)  |
| C131 | -P1  | -C121 | -C126 | 111.9(2)  |

|      |     |       |       |          |
|------|-----|-------|-------|----------|
| C221 | -P2 | -C211 | -C212 | -45.0(3) |
| Rh8  | -P2 | -C211 | -C212 | 173.1(2) |
| C231 | -P2 | -C211 | -C212 | 64.6(3)  |
| C211 | -P2 | -C231 | -C236 | 13.3(3)  |
| Rh8  | -P2 | -C211 | -C216 | -6.3(3)  |
| C221 | -P2 | -C231 | -C232 | -68.5(2) |

- 21 -

Table S7 - Torsion Angles (Degrees) (continued)  
for [8,8-(PPh3)2-nido-8,7-RhNB9H11] (1)

|      |     |       |       |           |
|------|-----|-------|-------|-----------|
| C221 | -P2 | -C211 | -C216 | 135.7(2)  |
| C211 | -P2 | -C231 | -C232 | -175.0(2) |
| Rh8  | -P2 | -C221 | -C226 | -106.5(3) |
| C221 | -P2 | -C231 | -C236 | 119.8(2)  |
| C211 | -P2 | -C221 | -C222 | -60.9(3)  |
| C231 | -P2 | -C211 | -C216 | -114.8(2) |
| Rh8  | -P2 | -C221 | -C222 | 72.9(3)   |
| Rh8  | -P2 | -C231 | -C232 | 67.0(2)   |
| Rh8  | -P2 | -C231 | -C236 | -104.8(2) |
| C211 | -P2 | -C221 | -C226 | 119.8(3)  |
| C231 | -P2 | -C221 | -C222 | -169.2(2) |
| C231 | -P2 | -C221 | -C226 | 11.4(3)   |
| B11  | -N7 | -B2   | -B3   | 138.8(3)  |
| Rh8  | -N7 | -B2   | -B6   | -68.5(3)  |
| B3   | -N7 | -B11  | -B2   | 45.1(3)   |
| B2   | -N7 | -B3   | -B4   | 99.9(3)   |
| B3   | -N7 | -B2   | -B11  | -138.8(3) |
| B11  | -N7 | -B3   | -B4   | 55.1(3)   |
| Rh8  | -N7 | -B3   | -B2   | -153.2(2) |
| B11  | -N7 | -B3   | -B1   | -7.1(4)   |
| Rh8  | -N7 | -B11  | -B6   | 85.6(3)   |

|     |     |      |      |            |
|-----|-----|------|------|------------|
| B2  | -N7 | -B11 | -B6  | -38.4(2)   |
| B11 | -N7 | -B3  | -B2  | -44.8(3)   |
| Rh8 | -N7 | -B3  | -B4  | -53.32(19) |
| B11 | -N7 | -B2  | -B6  | 37.7(2)    |
| B3  | -N7 | -B2  | -B6  | -101.1(3)  |
| Rh8 | -N7 | -B2  | -B11 | -106.2(3)  |
| B11 | -N7 | -B2  | -B1  | 101.5(3)   |

- 22 -

Table S7 - Torsion Angles (Degrees) (continued)  
for [8,8-(PPh3)2-nido-8,7-RhNB9H11] (1)

|      |       |       |       |           |
|------|-------|-------|-------|-----------|
| Rh8  | -N7   | -B2   | -B3   | 32.6(3)   |
| B3   | -N7   | -B11  | -B6   | 6.7(4)    |
| B2   | -N7   | -B3   | -B1   | 37.7(2)   |
| B11  | -N7   | -B3   | -Rh8  | 108.4(3)  |
| Rh8  | -N7   | -B3   | -B1   | -115.5(2) |
| B2   | -N7   | -B3   | -Rh8  | 153.2(2)  |
| B2   | -N7   | -B11  | -B10  | -99.7(3)  |
| B3   | -N7   | -B11  | -B10  | -54.6(4)  |
| Rh8  | -N7   | -B11  | -B10  | 24.3(3)   |
| Rh8  | -N7   | -B11  | -B2   | 124.0(2)  |
| B3   | -N7   | -B2   | -B1   | -37.4(3)  |
| Rh8  | -N7   | -B2   | -B1   | -4.8(4)   |
| C212 | -C211 | -C216 | -C215 | -1.3(5)   |
| C216 | -C211 | -C212 | -C213 | 1.3(5)    |
| P1   | -C111 | -C112 | -H112 | 2.00      |
| P2   | -C211 | -C216 | -C215 | 178.1(3)  |
| C116 | -C111 | -C112 | -H112 | 178.00    |
| C112 | -C111 | -C116 | -H116 | -179.00   |
| P2   | -C211 | -C212 | -C213 | -178.1(3) |
| P1   | -C111 | -C116 | -H116 | -3.00     |

|      |       |       |       |         |
|------|-------|-------|-------|---------|
| H112 | -C112 | -C113 | -C114 | -179.00 |
| C111 | -C112 | -C113 | -H113 | -178.00 |
| H112 | -C112 | -C113 | -H113 | 2.00    |
| C211 | -C212 | -C213 | -C214 | -0.8(5) |
| H113 | -C113 | -C114 | -H114 | 0.00    |
| C112 | -C113 | -C114 | -H114 | -180.00 |
| H113 | -C113 | -C114 | -C115 | -180.00 |
| C212 | -C213 | -C214 | -C215 | 0.2(6)  |

- 23 -

Table S7 - Torsion Angles (Degrees) (continued)  
for [8,8-(PPh<sub>3</sub>)<sub>2</sub>-nido-8,7-RhNB<sub>9</sub>H<sub>11</sub>] (1)

|      |       |       |       |           |
|------|-------|-------|-------|-----------|
| H114 | -C114 | -C115 | -C116 | 179.00    |
| C213 | -C214 | -C215 | -C216 | -0.2(6)   |
| C113 | -C114 | -C115 | -H115 | 179.00    |
| H114 | -C114 | -C115 | -H115 | -1.00     |
| H115 | -C115 | -C116 | -C111 | -179.00   |
| H115 | -C115 | -C116 | -H116 | 1.00      |
| C114 | -C115 | -C116 | -H116 | -179.00   |
| C214 | -C215 | -C216 | -C211 | 0.7(5)    |
| C226 | -C221 | -C222 | -C223 | 2.0(5)    |
| P2   | -C221 | -C222 | -C223 | -177.4(3) |
| P2   | -C221 | -C226 | -C225 | 177.6(3)  |
| C222 | -C221 | -C226 | -C225 | -1.7(5)   |
| P1   | -C121 | -C122 | -H122 | -2.00     |
| C126 | -C121 | -C122 | -H122 | -177.00   |
| P1   | -C121 | -C126 | -H126 | 3.00      |
| C122 | -C121 | -C126 | -H126 | 178.00    |
| H122 | -C122 | -C123 | -C124 | 178.00    |
| C221 | -C222 | -C223 | -C224 | -0.7(5)   |
| H122 | -C122 | -C123 | -H123 | -2.00     |

|      |       |       |       |         |
|------|-------|-------|-------|---------|
| C121 | -C122 | -C123 | -H123 | 178.00  |
| H123 | -C123 | -C124 | -H124 | 0.00    |
| C222 | -C223 | -C224 | -C225 | -1.0(5) |
| H123 | -C123 | -C124 | -C125 | 180.00  |
| C122 | -C123 | -C124 | -H124 | 180.00  |
| C223 | -C224 | -C225 | -C226 | 1.3(5)  |
| C123 | -C124 | -C125 | -H125 | -178.00 |
| H124 | -C124 | -C125 | -H125 | 2.00    |
| H124 | -C124 | -C125 | -C126 | -178.00 |

- 24 -

Table S7 - Torsion Angles (Degrees) (continued)  
for [8,8-(PPh<sub>3</sub>)<sub>2</sub>-nido-8,7-RhNB<sub>9</sub>H<sub>11</sub>] (1)

|      |       |       |       |           |
|------|-------|-------|-------|-----------|
| C224 | -C225 | -C226 | -C221 | 0.1(5)    |
| H125 | -C125 | -C126 | -C121 | 179.00    |
| C124 | -C125 | -C126 | -H126 | 179.00    |
| H125 | -C125 | -C126 | -H126 | -1.00     |
| C236 | -C231 | -C232 | -C233 | -0.3(5)   |
| P2   | -C231 | -C232 | -C233 | -172.4(3) |
| C136 | -C131 | -C132 | -H132 | -179.00   |
| P1   | -C131 | -C132 | -H132 | 2.00      |
| C232 | -C231 | -C236 | -C235 | -1.1(5)   |
| P2   | -C231 | -C236 | -C235 | 170.6(2)  |
| C132 | -C131 | -C136 | -H136 | 179.00    |
| P1   | -C131 | -C136 | -H136 | -1.00     |
| C231 | -C232 | -C233 | -C234 | 1.8(5)    |
| H132 | -C132 | -C133 | -C134 | 179.00    |
| C131 | -C132 | -C133 | -H133 | 179.00    |
| H132 | -C132 | -C133 | -H133 | -1.00     |
| H133 | -C133 | -C134 | -C135 | -180.00   |
| H133 | -C133 | -C134 | -H134 | 0.00      |



|      |       |       |       |         |
|------|-------|-------|-------|---------|
| C132 | -C133 | -C134 | -H134 | -180.00 |
| C232 | -C233 | -C234 | -C235 | -1.8(5) |
| C133 | -C134 | -C135 | -H135 | -180.00 |
| H134 | -C134 | -C135 | -C136 | -180.00 |
| H134 | -C134 | -C135 | -H135 | 0.00    |
| C233 | -C234 | -C235 | -C236 | 0.4(5)  |
| H135 | -C135 | -C136 | -H136 | 0.00    |
| C234 | -C235 | -C236 | -C231 | 1.1(5)  |
| H135 | -C135 | -C136 | -C131 | -180.00 |
| C134 | -C135 | -C136 | -H136 | -180.00 |

- 25 -

Table S7 - Torsion Angles (Degrees) (continued)  
for [8,8-(PPh<sub>3</sub>)<sub>2</sub>-nido-8,7-RhNB<sub>9</sub>H<sub>11</sub>] (1)

|    |     |     |      |           |
|----|-----|-----|------|-----------|
| B6 | -B1 | -B3 | -N7  | 4.0(3)    |
| B6 | -B1 | -B3 | -B2  | 41.3(2)   |
| B5 | -B1 | -B3 | -B4  | -38.8(2)  |
| B6 | -B1 | -B3 | -Rh8 | -70.1(3)  |
| B5 | -B1 | -B3 | -B2  | 104.2(3)  |
| B4 | -B1 | -B5 | -B6  | -136.3(2) |
| B2 | -B1 | -B4 | -Rh8 | 5.5(4)    |
| B3 | -B1 | -B5 | -B9  | 6.1(3)    |
| B5 | -B1 | -B3 | -N7  | 66.9(3)   |
| B4 | -B1 | -B3 | -Rh8 | 31.6(2)   |
| B3 | -B1 | -B5 | -B6  | -96.3(3)  |
| B2 | -B1 | -B4 | -B3  | 36.0(3)   |
| B2 | -B1 | -B4 | -B5  | -100.7(3) |
| B4 | -B1 | -B5 | -B9  | -33.8(2)  |
| B6 | -B1 | -B3 | -B4  | -101.7(3) |
| B6 | -B1 | -B5 | -B10 | 36.0(2)   |
| B4 | -B1 | -B3 | -N7  | 105.7(3)  |

|    |     |     |      |           |
|----|-----|-----|------|-----------|
| B3 | -B1 | -B5 | -B4  | 40.0(2)   |
| B2 | -B1 | -B3 | -Rh8 | -111.4(3) |
| B4 | -B1 | -B6 | -B5  | 38.6(2)   |
| B4 | -B1 | -B6 | -B10 | 2.4(3)    |
| B4 | -B1 | -B6 | -B11 | -65.8(3)  |
| B5 | -B1 | -B3 | -Rh8 | -7.2(3)   |
| B6 | -B1 | -B5 | -B4  | 136.3(2)  |
| B6 | -B1 | -B5 | -B9  | 102.5(3)  |
| B5 | -B1 | -B4 | -B3  | 136.7(3)  |
| B6 | -B1 | -B4 | -B3  | 98.0(3)   |
| B6 | -B1 | -B4 | -B5  | -38.7(2)  |

- 26 -

Table S7 - Torsion Angles (Degrees) (continued)  
for [8,8-(PPh3)2-nido-8,7-RhNB9H11] (1)

|    |     |     |      |           |
|----|-----|-----|------|-----------|
| B2 | -B1 | -B6 | -B5  | 147.4(3)  |
| B4 | -B1 | -B5 | -B10 | -100.3(3) |
| B4 | -B1 | -B3 | -B2  | 143.0(3)  |
| B2 | -B1 | -B5 | -B10 | 6.7(3)    |
| B2 | -B1 | -B4 | -B9  | -66.7(4)  |
| B3 | -B1 | -B2 | -N7  | 35.1(2)   |
| B3 | -B1 | -B6 | -B10 | 67.5(3)   |
| B3 | -B1 | -B6 | -B11 | -0.7(3)   |
| B3 | -B1 | -B4 | -Rh8 | -30.5(2)  |
| B3 | -B1 | -B5 | -B10 | -60.3(3)  |
| B3 | -B1 | -B4 | -B9  | -102.7(3) |
| B5 | -B1 | -B4 | -Rh8 | 106.2(3)  |
| B3 | -B1 | -B2 | -B11 | 89.6(3)   |
| B5 | -B1 | -B4 | -B9  | 34.0(2)   |
| B6 | -B1 | -B4 | -Rh8 | 67.5(3)   |
| B6 | -B1 | -B4 | -B9  | -4.7(3)   |

|    |     |     |      |           |
|----|-----|-----|------|-----------|
| B2 | -B1 | -B6 | -B10 | 111.1(3)  |
| B2 | -B1 | -B6 | -B11 | 43.0(2)   |
| B3 | -B1 | -B6 | -B2  | -43.7(2)  |
| B2 | -B1 | -B3 | -N7  | -37.3(2)  |
| B2 | -B1 | -B3 | -B4  | -143.0(3) |
| B6 | -B1 | -B2 | -B11 | -41.6(2)  |
| B6 | -B1 | -B2 | -N7  | -96.1(3)  |
| B5 | -B1 | -B6 | -B10 | -36.2(2)  |
| B3 | -B1 | -B4 | -B5  | -136.7(3) |
| B2 | -B1 | -B5 | -B4  | 107.0(3)  |
| B3 | -B1 | -B2 | -B6  | 131.2(3)  |
| B2 | -B1 | -B5 | -B9  | 73.2(3)   |

- 27 -

Table S7 - Torsion Angles (Degrees) (continued)  
for [8,8-(PPh3)2-nido-8,7-RhNB9H11] (1)

|    |     |     |      |           |
|----|-----|-----|------|-----------|
| B4 | -B1 | -B2 | -N7  | -0.8(4)   |
| B4 | -B1 | -B2 | -B3  | -35.9(3)  |
| B5 | -B1 | -B2 | -B6  | 30.0(2)   |
| B5 | -B1 | -B6 | -B11 | -104.4(3) |
| B4 | -B1 | -B6 | -B2  | -108.8(3) |
| B2 | -B1 | -B5 | -B6  | -29.3(2)  |
| B5 | -B1 | -B2 | -N7  | -66.1(3)  |
| B3 | -B1 | -B6 | -B5  | 103.7(3)  |
| B5 | -B1 | -B2 | -B11 | -11.6(3)  |
| B4 | -B1 | -B2 | -B11 | 53.7(3)   |
| B5 | -B1 | -B6 | -B2  | -147.4(3) |
| B4 | -B1 | -B2 | -B6  | 95.3(3)   |
| B6 | -B1 | -B2 | -B3  | -131.2(3) |
| B5 | -B1 | -B2 | -B3  | -101.2(3) |
| B6 | -B2 | -B3 | -B4  | -10.5(3)  |

|    |     |      |      |           |
|----|-----|------|------|-----------|
| B1 | -B2 | -B3  | -N7  | 135.9(3)  |
| B1 | -B2 | -B3  | -Rh8 | 106.2(3)  |
| N7 | -B2 | -B6  | -B1  | 97.3(2)   |
| B6 | -B2 | -B3  | -Rh8 | 62.5(3)   |
| B1 | -B2 | -B3  | -B4  | 33.3(2)   |
| B6 | -B2 | -B3  | -N7  | 92.2(3)   |
| B6 | -B2 | -B3  | -B1  | -43.7(2)  |
| B3 | -B2 | -B11 | -B10 | 71.6(3)   |
| B6 | -B2 | -B11 | -N7  | -135.6(3) |
| N7 | -B2 | -B3  | -Rh8 | -29.7(2)  |
| B1 | -B2 | -B11 | -N7  | -92.3(3)  |
| B1 | -B2 | -B6  | -B11 | -132.0(2) |
| N7 | -B2 | -B6  | -B5  | 67.4(3)   |

- 28 -

Table S7 - Torsion Angles (Degrees) (continued)  
for [8,8-(PPh<sub>3</sub>)<sub>2</sub>-nido-8,7-RhNB<sub>9</sub>H<sub>11</sub>] (1)

|     |     |      |      |           |
|-----|-----|------|------|-----------|
| B11 | -B2 | -B3  | -N7  | 32.1(2)   |
| B1  | -B2 | -B11 | -B6  | 43.3(2)   |
| N7  | -B2 | -B3  | -B4  | -102.6(3) |
| B3  | -B2 | -B11 | -N7  | -32.6(2)  |
| B3  | -B2 | -B11 | -B6  | 103.0(2)  |
| N7  | -B2 | -B11 | -B10 | 104.2(3)  |
| B11 | -B2 | -B3  | -Rh8 | 2.4(3)    |
| B3  | -B2 | -B6  | -B10 | -54.1(3)  |
| B11 | -B2 | -B3  | -B1  | -103.8(3) |
| B1  | -B2 | -B11 | -B10 | 11.9(3)   |
| N7  | -B2 | -B3  | -B1  | -135.9(3) |
| B11 | -B2 | -B3  | -B4  | -70.6(3)  |
| B1  | -B2 | -B6  | -B10 | -95.9(3)  |
| N7  | -B2 | -B6  | -B10 | 1.4(3)    |

|     |     |      |      |           |
|-----|-----|------|------|-----------|
| N7  | -B2 | -B6  | -B11 | -34.7(2)  |
| B6  | -B2 | -B11 | -B10 | -31.3(2)  |
| N7  | -B2 | -B11 | -B6  | 135.6(3)  |
| B11 | -B2 | -B6  | -B1  | 132.0(2)  |
| B1  | -B2 | -B6  | -B5  | -29.9(2)  |
| B11 | -B2 | -B6  | -B10 | 36.1(3)   |
| B3  | -B2 | -B6  | -B1  | 41.8(2)   |
| B11 | -B2 | -B6  | -B5  | 102.1(3)  |
| B3  | -B2 | -B6  | -B5  | 11.9(3)   |
| B3  | -B2 | -B6  | -B11 | -90.2(2)  |
| N7  | -B3 | -B4  | -B1  | -94.4(3)  |
| B1  | -B3 | -B4  | -B9  | 101.3(3)  |
| Rh8 | -B3 | -B4  | -B5  | -111.6(2) |
| B2  | -B3 | -B4  | -B9  | 68.4(3)   |

- 29 -

Table S7 - Torsion Angles (Degrees) (continued)  
for [8,8-(PPh<sub>3</sub>)<sub>2</sub>-nido-8,7-RhNB<sub>9</sub>H<sub>11</sub>] (1)

|     |     |     |      |           |
|-----|-----|-----|------|-----------|
| N7  | -B3 | -B4 | -Rh8 | 55.32(19) |
| Rh8 | -B3 | -B4 | -B9  | -48.5(2)  |
| B1  | -B3 | -B4 | -Rh8 | 149.8(2)  |
| B1  | -B3 | -B4 | -B5  | 38.1(2)   |
| N7  | -B3 | -B4 | -B5  | -56.3(3)  |
| N7  | -B3 | -B4 | -B9  | 6.9(3)    |
| Rh8 | -B3 | -B4 | -B1  | -149.8(2) |
| B2  | -B3 | -B4 | -B1  | -32.9(2)  |
| B2  | -B3 | -B4 | -B5  | 5.2(3)    |
| B2  | -B3 | -B4 | -Rh8 | 116.8(2)  |
| B1  | -B4 | -B5 | -B9  | 142.6(3)  |
| B5  | -B4 | -B9 | -B10 | 39.2(2)   |
| Rh8 | -B4 | -B5 | -B9  | 36.0(2)   |

|     |     |     |      |           |
|-----|-----|-----|------|-----------|
| B3  | -B4 | -B5 | -B9  | 105.4(3)  |
| B3  | -B4 | -B5 | -B6  | 1.9(3)    |
| Rh8 | -B4 | -B9 | -B5  | -144.6(2) |
| Rh8 | -B4 | -B5 | -B10 | -5.0(3)   |
| Rh8 | -B4 | -B5 | -B1  | -106.6(2) |
| B5  | -B4 | -B9 | -Rh8 | 144.6(2)  |
| B9  | -B4 | -B5 | -B6  | -103.4(3) |
| Rh8 | -B4 | -B9 | -B10 | -105.4(2) |
| Rh8 | -B4 | -B5 | -B6  | -67.4(3)  |
| B1  | -B4 | -B9 | -Rh8 | 110.4(2)  |
| B1  | -B4 | -B9 | -B5  | -34.1(2)  |
| B3  | -B4 | -B5 | -B10 | 64.3(3)   |
| B9  | -B4 | -B5 | -B1  | -142.6(3) |
| B3  | -B4 | -B9 | -Rh8 | 48.0(2)   |
| B1  | -B4 | -B5 | -B10 | 101.5(3)  |

- 30 -

Table S7 - Torsion Angles (Degrees) (continued)  
for [8,8-(PPh<sub>3</sub>)<sub>2</sub>-nido-8,7-RhNB<sub>9</sub>H<sub>11</sub>] (1)

|    |     |     |      |           |
|----|-----|-----|------|-----------|
| B3 | -B4 | -B5 | -B1  | -37.2(2)  |
| B3 | -B4 | -B9 | -B10 | -57.4(3)  |
| B1 | -B4 | -B9 | -B10 | 5.1(3)    |
| B1 | -B4 | -B5 | -B6  | 39.2(2)   |
| B3 | -B4 | -B9 | -B5  | -96.6(3)  |
| B9 | -B4 | -B5 | -B10 | -41.1(2)  |
| B4 | -B5 | -B6 | -B2  | -9.0(3)   |
| B9 | -B5 | -B6 | -B2  | -72.2(3)  |
| B9 | -B5 | -B6 | -B10 | 37.4(3)   |
| B9 | -B5 | -B6 | -B1  | -102.1(3) |
| B4 | -B5 | -B6 | -B1  | -38.9(2)  |
| B4 | -B5 | -B9 | -Rh8 | -37.3(2)  |

|     |     |      |      |           |
|-----|-----|------|------|-----------|
| B1  | -B5 | -B9  | -B4  | 34.1(2)   |
| B1  | -B5 | -B10 | -B9  | 103.3(3)  |
| B9  | -B5 | -B6  | -B11 | -5.4(4)   |
| B4  | -B5 | -B6  | -B11 | 57.8(3)   |
| B4  | -B5 | -B6  | -B10 | 100.5(3)  |
| B1  | -B5 | -B6  | -B11 | 96.7(3)   |
| B10 | -B5 | -B6  | -B2  | -109.5(3) |
| B10 | -B5 | -B6  | -B11 | -42.8(3)  |
| B1  | -B5 | -B9  | -Rh8 | -3.2(3)   |
| B4  | -B5 | -B9  | -B10 | -135.1(3) |
| B6  | -B5 | -B9  | -Rh8 | 61.8(3)   |
| B6  | -B5 | -B9  | -B4  | 99.1(3)   |
| B1  | -B5 | -B6  | -B10 | 139.4(3)  |
| B1  | -B5 | -B9  | -B10 | -101.0(3) |
| B1  | -B5 | -B6  | -B2  | 29.9(2)   |
| B10 | -B5 | -B9  | -B4  | 135.1(3)  |

- 31 -

Table S7 - Torsion Angles (Degrees) (continued)  
for [8,8-(PPh<sub>3</sub>)<sub>2</sub>-nido-8,7-RhNB<sub>9</sub>H<sub>11</sub>] (1)

|     |     |      |      |           |
|-----|-----|------|------|-----------|
| B1  | -B5 | -B10 | -B6  | -36.7(2)  |
| B4  | -B5 | -B10 | -B11 | -62.7(3)  |
| B6  | -B5 | -B10 | -B9  | 140.0(3)  |
| B6  | -B5 | -B10 | -B11 | 37.6(2)   |
| B10 | -B5 | -B6  | -B1  | -139.4(3) |
| B10 | -B5 | -B9  | -Rh8 | 97.8(3)   |
| B9  | -B5 | -B10 | -B11 | -102.4(3) |
| B1  | -B5 | -B10 | -B11 | 0.9(3)    |
| B4  | -B5 | -B10 | -B6  | -100.3(3) |
| B9  | -B5 | -B10 | -B6  | -140.0(3) |
| B6  | -B5 | -B9  | -B10 | -36.0(3)  |

|     |     |      |      |           |
|-----|-----|------|------|-----------|
| B4  | -B5 | -B10 | -B9  | 39.7(2)   |
| B5  | -B6 | -B11 | -B10 | 40.4(3)   |
| B1  | -B6 | -B11 | -B10 | 102.9(3)  |
| B11 | -B6 | -B10 | -B9  | 99.9(3)   |
| B2  | -B6 | -B10 | -B9  | 64.9(3)   |
| B1  | -B6 | -B11 | -N7  | -3.0(3)   |
| B5  | -B6 | -B11 | -N7  | -65.5(3)  |
| B2  | -B6 | -B10 | -B5  | 100.3(3)  |
| B1  | -B6 | -B10 | -B11 | -99.2(3)  |
| B10 | -B6 | -B11 | -N7  | -105.9(3) |
| B2  | -B6 | -B11 | -B10 | 144.6(3)  |
| B1  | -B6 | -B10 | -B5  | 36.0(2)   |
| B2  | -B6 | -B10 | -B11 | -35.0(3)  |
| B5  | -B6 | -B10 | -B9  | -35.3(2)  |
| B1  | -B6 | -B11 | -B2  | -41.7(2)  |
| B10 | -B6 | -B11 | -B2  | -144.6(3) |
| B5  | -B6 | -B11 | -B2  | -104.2(3) |

- 32 -

Table S7 - Torsion Angles (Degrees) (continued)  
for [8,8-(PPh3)2-nido-8,7-RhNB9H11] (1)

|     |     |      |      |           |
|-----|-----|------|------|-----------|
| B1  | -B6 | -B10 | -B9  | 0.7(3)    |
| B11 | -B6 | -B10 | -B5  | 135.3(3)  |
| B2  | -B6 | -B11 | -N7  | 38.6(2)   |
| B5  | -B6 | -B10 | -B11 | -135.3(3) |
| B4  | -B9 | -B10 | -B5  | -39.9(2)  |
| Rh8 | -B9 | -B10 | -B6  | -74.8(3)  |
| Rh8 | -B9 | -B10 | -B11 | -14.6(3)  |
| B4  | -B9 | -B10 | -B11 | 56.7(3)   |
| Rh8 | -B9 | -B10 | -B5  | -111.2(3) |
| B4  | -B9 | -B10 | -B6  | -3.5(3)   |



|    |      |      |      |           |
|----|------|------|------|-----------|
| B5 | -B9  | -B10 | -B11 | 96.6(3)   |
| B5 | -B9  | -B10 | -B6  | 36.4(2)   |
| B9 | -B10 | -B11 | -B2  | -69.2(3)  |
| B9 | -B10 | -B11 | -B6  | -100.8(3) |
| B5 | -B10 | -B11 | -B2  | -8.0(3)   |
| B6 | -B10 | -B11 | -B2  | 31.6(2)   |
| B6 | -B10 | -B11 | -N7  | 95.1(3)   |
| B5 | -B10 | -B11 | -N7  | 55.6(3)   |
| B9 | -B10 | -B11 | -N7  | -5.6(3)   |
| B5 | -B10 | -B11 | -B6  | -39.6(2)  |

- 33 -

Table S8 - Contact Distances(Angstrom)  
for [8,8-(PPh3)2-nido-8,7-RhNB9H11] (1)

|      |         |            |      |         |           |
|------|---------|------------|------|---------|-----------|
| Rh8  | .H112   | 3.2400     | N7   | .H3     | 2.30(4)   |
| Rh8  | .H126   | 2.9500     | N7   | .H910   | 2.48(4)   |
| Rh8  | .H216   | 3.0500     | C1S  | .C12S   | 2.730(14) |
| Rh8  | .H232   | 3.5300     | C1S  | .C11S   | 2.083(13) |
| C11S | .C1S    | 2.083(13)  | C112 | .C136   | 3.232(4)  |
| C11S | .C1S_a  | 2.079(12)  | C114 | .C124_b | 3.562(6)  |
| C11S | .C11S_a | 2.944(11)  | C115 | .C123_c | 3.548(5)  |
| C12S | .C13S   | 2.419(15)  | C115 | .C226   | 3.574(5)  |
| C12S | .C12S_a | 2.944(16)  | C116 | .C221   | 3.399(4)  |
| C12S | .C1S    | 2.730(14)  | C116 | .C122   | 3.328(6)  |
| C13S | .C12S   | 2.419(15)  | C116 | .C226   | 3.379(5)  |
| C13S | .C1S_a  | 2.759(14)  | C121 | .C222   | 3.374(5)  |
| C13S | .C13S_a | 2.954(15)  | C122 | .C116   | 3.328(6)  |
| P1   | .B9     | 3.181(4)   | C122 | .C132   | 3.507(5)  |
| P1   | .P2     | 3.5017(12) | C123 | .C115_c | 3.548(5)  |
| P1   | .B4     | 3.246(4)   | C124 | .C114_e | 3.562(6)  |
| P2   | .P1     | 3.5017(12) | C126 | .C222   | 3.339(5)  |

|    |       |          |      |         |          |
|----|-------|----------|------|---------|----------|
| P2 | .N7   | 3.255(2) | C132 | .C122   | 3.507(5) |
| P1 | .H9   | 3.13(4)  | C133 | .C133_f | 3.555(5) |
| P2 | .H7   | 2.98(3)  | C136 | .C112   | 3.232(4) |
| N7 | .C231 | 3.227(4) | C111 | .H136   | 2.7500   |
| N7 | .C236 | 3.363(4) | C112 | .H232   | 2.8000   |
| N7 | .P2   | 3.255(2) | C212 | .C222   | 3.543(5) |
| N7 | .B5   | 3.260(5) | C112 | .H136   | 2.5000   |
| N7 | .B9   | 3.033(5) | C212 | .C236   | 3.341(5) |
| N7 | .B10  | 2.836(5) | C113 | .H232   | 2.9300   |
| N7 | .B1   | 2.646(4) | C116 | .H122   | 2.9200   |
| N7 | .B4   | 2.824(4) | C121 | .H132   | 2.6800   |

- 34 -

Table S8 - Contact Distances(Angstrom) (continued)  
for [8,8-(PPh<sub>3</sub>)<sub>2</sub>-nido-8,7-RhNB<sub>9</sub>H<sub>11</sub>] (1)

|      |         |          |      |         |          |
|------|---------|----------|------|---------|----------|
| C221 | .C116   | 3.399(4) | C221 | .H212   | 2.8400   |
| C121 | .H116   | 2.9000   | C223 | .H213_g | 2.9800   |
| C121 | .H222   | 3.0000   | C224 | .H213_g | 3.0900   |
| C222 | .C126   | 3.339(5) | C226 | .H232   | 3.0200   |
| C222 | .C212   | 3.543(5) | C231 | .H226   | 2.7200   |
| C122 | .H116   | 2.6800   | C231 | .H7     | 2.63(4)  |
| C222 | .C121   | 3.374(5) | C232 | .H3     | 2.92(4)  |
| C123 | .H1_d   | 2.97(3)  | C232 | .H226   | 2.6100   |
| C124 | .H114_e | 3.0200   | C235 | .H11_h  | 3.10(4)  |
| C124 | .H1_d   | 2.97(4)  | C236 | .H7     | 2.54(4)  |
| C125 | .H222   | 2.8900   | B3   | .B5     | 2.890(6) |
| C226 | .C232   | 3.301(5) | B3   | .B11    | 2.725(5) |
| C226 | .C115   | 3.574(5) | B3   | .B9     | 2.966(6) |
| C126 | .H222   | 2.6200   | B3   | .B10    | 3.374(6) |
| C126 | .H132   | 3.0000   | B4   | .B10    | 2.876(5) |
| C226 | .C116   | 3.379(5) | B4   | .P1     | 3.246(4) |

|      |         |          |    |         |          |
|------|---------|----------|----|---------|----------|
| C131 | .H4     | 3.01(4)  | B4 | .B2     | 2.984(5) |
| C131 | .H9     | 3.10(4)  | B4 | .N7     | 2.824(4) |
| C132 | .H9     | 2.75(4)  | B4 | .B11    | 3.349(5) |
| C232 | .C226   | 3.301(5) | B4 | .C131   | 3.457(4) |
| C134 | .H224_c | 3.0700   | B9 | .B11    | 3.009(5) |
| C136 | .H112   | 2.9800   | B9 | .B1     | 2.909(5) |
| C136 | .H4     | 3.07(4)  | B9 | .B3     | 2.966(6) |
| C236 | .C212   | 3.341(5) | B9 | .C131   | 3.473(4) |
| C236 | .N7     | 3.363(4) | B9 | .P1     | 3.181(4) |
| C211 | .H236   | 2.6200   | B9 | .N7     | 3.033(5) |
| C211 | .H222   | 3.0100   | B3 | .H7     | 2.12(4)  |
| C212 | .H236   | 2.7400   | B3 | .H135_i | 2.8800   |

- 35 -

Table S8 - Contact Distances(Angstrom) (continued)  
for [8,8-(PPh3)2-nido-8,7-RhNB9H11] (1)

|     |         |         |      |         |        |
|-----|---------|---------|------|---------|--------|
| B3  | .H4     | 2.53(4) | H113 | .H133_b | 2.4900 |
| B4  | .H9     | 2.69(4) | H113 | .H132_b | 2.5800 |
| B4  | .H3     | 2.58(4) | H114 | .C124_b | 3.0200 |
| B4  | .H910   | 2.77(4) | H116 | .H122   | 2.3600 |
| B9  | .H4     | 2.57(4) | H116 | .C121   | 2.9000 |
| B11 | .H216   | 3.0300  | H116 | .C122   | 2.6800 |
| H1  | .H223_j | 2.4400  | H122 | .C116   | 2.9200 |
| H1  | .C123_j | 2.97(3) | H122 | .H116   | 2.3600 |
| H1  | .C124_j | 2.97(4) | H122 | .H122_c | 2.5600 |
| H3  | .H135_i | 2.3700  | H126 | .Rh8    | 2.9500 |
| H3  | .C232   | 2.92(4) | H132 | .H113_e | 2.5800 |
| H4  | .C136   | 3.07(4) | H132 | .C121   | 2.6800 |
| H4  | .C131   | 3.01(4) | H132 | .C126   | 3.0000 |
| H5  | .H133_f | 2.5900  | H132 | .H9     | 2.3800 |
| H6  | .H225_k | 2.3500  | H133 | .H5_f   | 2.5900 |

|      |         |         |      |         |        |
|------|---------|---------|------|---------|--------|
| H7   | .C236   | 2.54(4) | H133 | .H113_e | 2.4900 |
| H7   | .C231   | 2.63(4) | H135 | .B3_i   | 2.8800 |
| H9   | .C131   | 3.10(4) | H135 | .H3_i   | 2.3700 |
| H9   | .H132   | 2.3800  | H136 | .H112   | 2.3000 |
| H9   | .C132   | 2.75(4) | H136 | .C111   | 2.7500 |
| H10  | .H234_e | 2.5500  | H136 | .C112   | 2.5000 |
| H10  | .H214_l | 2.4100  | H212 | .C221   | 2.8400 |
| H11  | .H215_l | 2.5900  | H213 | .C223_g | 2.9800 |
| H11  | .H235_h | 2.4200  | H213 | .C224_g | 3.0900 |
| H11  | .C235_h | 3.10(4) | H214 | .H10_l  | 2.4100 |
| H112 | .H136   | 2.3000  | H215 | .H11_l  | 2.5900 |
| H112 | .C136   | 2.9800  | H216 | .H910   | 2.5100 |
| H112 | .Rh8    | 3.2400  | H216 | .B11    | 3.0300 |

- 36 -

Table S8 - Contact Distances(Angstrom) (continued)  
for [8,8-(PPh3)2-nido-8,7-RhNB9H11] (1)

|      |         |        |      |        |        |
|------|---------|--------|------|--------|--------|
| H216 | .Rh8    | 3.0500 | H232 | .Rh8   | 3.5300 |
| H222 | .C125   | 2.8900 | H232 | .C112  | 2.8000 |
| H222 | .C126   | 2.6200 | H232 | .H226  | 2.4300 |
| H222 | .C211   | 3.0100 | H232 | .C113  | 2.9300 |
| H222 | .C121   | 3.0000 | H232 | .C226  | 3.0200 |
| H223 | .H1_d   | 2.4400 | H234 | .H10_b | 2.5500 |
| H224 | .C134_c | 3.0700 | H235 | .H11_h | 2.4200 |
| H225 | .H6_m   | 2.3500 | H236 | .C212  | 2.7400 |
| H226 | .C232   | 2.6100 | H236 | .C211  | 2.6200 |
| H226 | .C231   | 2.7200 | H910 | .H216  | 2.5100 |
| H226 | .H232   | 2.4300 |      |        |        |

- 37 -

Translation of Symmetry Code to Equiv.Pos

a = [ 2656.00 ] = 1-x, -y, 1-z  
 b = [ 1455.00 ] = -1+x, y, z  
 c = [ 2555.00 ] = -x, -y, -z  
 d = [ 1545.00 ] = x, -1+y, z  
 e = [ 1655.00 ] = 1+x, y, z  
 f = [ 2665.00 ] = 1-x, 1-y, -z  
 g = [ 2556.00 ] = -x, -y, 1-z  
 h = [ 2566.00 ] = -x, 1-y, 1-z  
 i = [ 2565.00 ] = -x, 1-y, -z  
 j = [ 1565.00 ] = x, 1+y, z  
 k = [ 1665.00 ] = 1+x, 1+y, z  
 l = [ 2666.00 ] = 1-x, 1-y, 1-z  
 m = [ 1445.00 ] = -1+x, -1+y, z

Table S1 - Crystal Data and Details of the Structure Determination  
for [9-(OMe)-8,8-(PMe2Ph)2-NIDO-8,7-PtCB9H11] (2)

### Crystal Data

|                          |                    |            |           |
|--------------------------|--------------------|------------|-----------|
| Formula                  | C18 H35 B9 O P2 Pt |            |           |
| Formula Weight           | 621.78             |            |           |
| Crystal System           | Monoclinic         |            |           |
| Space group              | P21/a              | (No. 14)   |           |
| a, b, c [Angstrom]       | 18.217(2)          | 13.785(2)  | 20.778(4) |
| alpha, beta, gamma [deg] | 90                 | 99.890(10) | 90        |
| V [Ang**3]               | 5140.3(14)         |            |           |
| Z                        | 8                  |            |           |
| D(calc) [g/cm**3]        | 1.607              |            |           |
| Mu(MoKa) [ /mm ]         | 5.594              |            |           |
| F(000)                   | 2432               |            |           |
| Crystal Size [mm]        | 0.15 x             | 0.40 x     | 0.60      |

### Data Collection

|                                  |           |         |       |
|----------------------------------|-----------|---------|-------|
| Temperature (K)                  | 200       |         |       |
| Radiation [Angstrom]             | MoKa      | 0.71073 |       |
| Theta Min-Max [Deg]              | 2.0, 25.0 |         |       |
| Dataset                          | -21: 21 ; | 0: 16 ; | 0: 24 |
| Tot., Uniq. Data, R(int)         | 9459,     | 9034,   | 0.000 |
| Observed data [I > 2.0 sigma(I)] | 7155      |         |       |

### Refinement

|            |       |     |
|------------|-------|-----|
| Nref, Npar | 9034, | 605 |
|------------|-------|-----|

|                                                 |                          |
|-------------------------------------------------|--------------------------|
| R, wR2, S                                       | 0.0202, 0.0505, 0.97     |
| $w = 1/[\sqrt{s^2(Fo^2)+(0.0319P)^2}]$          | where $P=(Fo^2+2Fc^2)/3$ |
| Max. and Av. Shift/Error                        | 0.00, 0.00               |
| Min. and Max. Resd. Dens. [e/Ang <sup>3</sup> ] | -1.22, 0.98              |

Table S2 - Final Coordinates and Equivalent Isotropic Displacement Parameters of the non-Hydrogen atoms for [9-(OMe)-8,8-(PMe2Ph)2-NIDO-8,7-PtCB9H11] (2)

| Atom | x           | y           | z           | U(eq) [Ang <sup>2</sup> ] |
|------|-------------|-------------|-------------|---------------------------|
| ---- | ---         | ---         | ---         | -----                     |
| Pt7A | 0.25447(1)  | 0.27923(1)  | 0.07816(1)  | 0.0210(1)                 |
| P1   | 0.23977(5)  | 0.29007(6)  | 0.18431(4)  | 0.0234(3)                 |
| P2   | 0.38354(5)  | 0.30831(7)  | 0.09729(5)  | 0.0254(3)                 |
| O11A | 0.13191(14) | 0.42965(17) | 0.09651(13) | 0.0361(9)                 |
| C8A  | 0.2640(2)   | 0.2473(3)   | -0.0218(2)  | 0.0354(14)                |
| C11  | 0.1493(2)   | 0.2575(3)   | 0.20322(19) | 0.0322(12)                |
| C11A | 0.1247(3)   | 0.5322(3)   | 0.0854(3)   | 0.076(2)                  |
| C12  | 0.2569(2)   | 0.4049(3)   | 0.22606(18) | 0.0311(12)                |
| C21  | 0.43945(19) | 0.1991(3)   | 0.1121(2)   | 0.0388(14)                |
| C22  | 0.4176(2)   | 0.3645(3)   | 0.02858(19) | 0.0424(14)                |
| C131 | 0.30125(19) | 0.2019(3)   | 0.23141(18) | 0.0288(11)                |
| C132 | 0.3434(2)   | 0.2223(3)   | 0.29184(19) | 0.0389(14)                |
| C133 | 0.3896(2)   | 0.1518(4)   | 0.3255(2)   | 0.0528(18)                |
| C134 | 0.3928(2)   | 0.0612(4)   | 0.2991(3)   | 0.0549(18)                |
| C135 | 0.3505(3)   | 0.0388(3)   | 0.2392(3)   | 0.0530(19)                |
| C136 | 0.3050(2)   | 0.1097(3)   | 0.2053(2)   | 0.0395(14)                |
| C231 | 0.41878(17) | 0.3911(2)   | 0.16407(17) | 0.0226(10)                |
| C232 | 0.40380(19) | 0.4899(2)   | 0.15434(18) | 0.0287(11)                |
| C233 | 0.4231(2)   | 0.5555(3)   | 0.20482(19) | 0.0325(11)                |
| C234 | 0.4558(2)   | 0.5229(3)   | 0.26594(19) | 0.0333(12)                |
| C235 | 0.4720(2)   | 0.4254(3)   | 0.27577(19) | 0.0334(12)                |
| C236 | 0.45456(18) | 0.3596(2)   | 0.22490(17) | 0.0275(11)                |
| B1A  | 0.1152(2)   | 0.2086(4)   | -0.0449(2)  | 0.0413(16)                |
| B2A  | 0.1348(2)   | 0.2405(3)   | 0.0392(2)   | 0.0308(12)                |
| B3A  | 0.2022(2)   | 0.1715(3)   | -0.0014(2)  | 0.0347(16)                |
| B4A  | 0.1947(3)   | 0.2160(4)   | -0.0815(2)  | 0.0499(19)                |

Table S2 - Final Coordinates and Equivalent Isotropic Displacement Parameters of the non-Hydrogen atoms (continued) for [9-(OMe)-8,8-(PMe2Ph)2-NIDO-8,7-PtCB9H11] (2)

| Atom | x           | y           | z           | U(eq) [Ang <sup>2</sup> ] |
|------|-------------|-------------|-------------|---------------------------|
| ---- | ---         | ---         | ---         | -----                     |
| B5A  | 0.1358(3)   | 0.3159(4)   | -0.0892(2)  | 0.0490(19)                |
| B6A  | 0.0883(2)   | 0.3237(4)   | -0.0199(2)  | 0.0413(16)                |
| B9A  | 0.2318(3)   | 0.3368(4)   | -0.0657(2)  | 0.0433(19)                |
| B10A | 0.1548(3)   | 0.4130(4)   | -0.0340(3)  | 0.0409(17)                |
| B11A | 0.1477(2)   | 0.3707(3)   | 0.0473(2)   | 0.0301(12)                |
| Pt7B | 0.23840(1)  | 0.25565(1)  | 0.56597(1)  | 0.0194(1)                 |
| P3   | 0.22288(5)  | 0.24795(6)  | 0.67220(4)  | 0.0223(3)                 |
| P4   | 0.36635(5)  | 0.22076(6)  | 0.58481(5)  | 0.0230(3)                 |
| O8B  | 0.11276(13) | 0.11061(16) | 0.58168(12) | 0.0278(8)                 |
| C8B  | 0.1061(3)   | 0.0083(3)   | 0.5713(2)   | 0.0546(18)                |
| C11B | 0.2492(2)   | 0.2856(3)   | 0.46559(18) | 0.0294(11)                |
| C31  | 0.13190(19) | 0.2801(3)   | 0.69035(18) | 0.0302(12)                |
| C32  | 0.2403(2)   | 0.1342(2)   | 0.71492(18) | 0.0303(11)                |
| C41  | 0.3932(2)   | 0.1450(3)   | 0.52122(19) | 0.0342(12)                |
| C42  | 0.42195(19) | 0.3297(3)   | 0.58290(19) | 0.0334(11)                |
| C331 | 0.28363(18) | 0.3378(2)   | 0.71874(17) | 0.0252(11)                |
| C332 | 0.2952(2)   | 0.4255(2)   | 0.68845(19) | 0.0304(11)                |
| C333 | 0.3417(2)   | 0.4951(3)   | 0.7219(2)   | 0.0364(14)                |
| C334 | 0.3764(2)   | 0.4783(3)   | 0.7854(2)   | 0.0382(14)                |
| C335 | 0.3641(2)   | 0.3926(3)   | 0.81515(19) | 0.0414(14)                |
| C336 | 0.3173(2)   | 0.3229(3)   | 0.78258(18) | 0.0340(12)                |
| C431 | 0.40757(18) | 0.1594(2)   | 0.65930(18) | 0.0272(11)                |
| C432 | 0.4401(2)   | 0.2103(3)   | 0.71463(19) | 0.0367(11)                |
| C433 | 0.4679(2)   | 0.1616(4)   | 0.7718(2)   | 0.0526(16)                |
| C434 | 0.4642(3)   | 0.0620(4)   | 0.7736(3)   | 0.0631(19)                |



Table S2 - Final Coordinates and Equivalent Isotropic Displacement Parameters of the non-Hydrogen atoms (continued) for [9-(OMe)-8,8-(PMe2Ph)2-NIDO-8,7-PtCB9H11] (2)

| Atom | x         | y         | z         | U(eq) [Ang^2] |
|------|-----------|-----------|-----------|---------------|
| ---- | ---       | ---       | ---       | -----         |
| C435 | 0.4318(3) | 0.0107(3) | 0.7196(3) | 0.0548(19)    |
| C436 | 0.4037(2) | 0.0590(3) | 0.6622(2) | 0.0390(14)    |
| B1B  | 0.1027(2) | 0.3364(3) | 0.4434(2) | 0.0302(12)    |
| B2B  | 0.1206(2) | 0.3007(3) | 0.5269(2) | 0.0255(12)    |
| B3B  | 0.0710(2) | 0.2224(3) | 0.4664(2) | 0.0297(12)    |
| B4B  | 0.1173(3) | 0.2300(3) | 0.3969(2) | 0.0339(14)    |
| B5B  | 0.1814(2) | 0.3252(3) | 0.4064(2) | 0.0307(12)    |
| B6B  | 0.1916(2) | 0.3657(3) | 0.4880(2) | 0.0268(12)    |
| B8B  | 0.1298(2) | 0.1703(3) | 0.5325(2) | 0.0250(11)    |
| B9B  | 0.1342(2) | 0.1296(3) | 0.4497(2) | 0.0304(12)    |
| B10B | 0.2128(3) | 0.2016(3) | 0.4180(2) | 0.0328(12)    |

U(eq) = 1/3 of the trace of the orthogonalized U Tensor

Table S3 - Hydrogen Atom Positions and Isotropic Displacement Parameters  
for [9-(OMe)-8,8-(PMe<sub>2</sub>Ph)<sub>2</sub>-NIDO-8,7-PtCB<sub>9</sub>H<sub>11</sub>] (2)

| Atom | x          | y        | z           | U(iso) [Ang <sup>2</sup> ] |
|------|------------|----------|-------------|----------------------------|
| H1A  | 0.07080    | 0.15400  | -0.06260    | 0.0500                     |
| H2A  | 0.10730    | 0.20310  | 0.07650     | 0.0370                     |
| H3A  | 0.21530    | 0.09340  | 0.01020     | 0.0420                     |
| H4A  | 0.20000    | 0.16990  | -0.12490    | 0.0600                     |
| H5A  | 0.10790    | 0.33630  | -0.13960    | 0.0590                     |
| H6A  | 0.02750    | 0.34090  | -0.02490    | 0.0490                     |
| H8A  | 0.315(2)   | 0.222(3) | -0.026(2)   | 0.042(11)                  |
| H9A  | 0.2690(19) | 0.377(2) | -0.0952(18) | 0.031(10)                  |
| H10A | 0.143(2)   | 0.484(3) | -0.054(2)   | 0.057(13)                  |
| H11D | 0.07880    | 0.54550  | 0.05460     | 0.1140                     |
| H11E | 0.12290    | 0.56530  | 0.12680     | 0.1140                     |
| H11F | 0.16760    | 0.55590  | 0.06720     | 0.1140                     |
| H11G | 0.13440    | 0.19400  | 0.18420     | 0.0480                     |
| H11H | 0.15230    | 0.25470  | 0.25070     | 0.0480                     |
| H11I | 0.11250    | 0.30630  | 0.18490     | 0.0480                     |
| H12D | 0.30940    | 0.42280  | 0.22870     | 0.0470                     |
| H12E | 0.24530    | 0.39930  | 0.27020     | 0.0470                     |
| H12F | 0.22530    | 0.45500  | 0.20190     | 0.0470                     |
| H20A | 0.49230    | 0.21570  | 0.11520     | 0.0580                     |
| H20B | 0.42490    | 0.15340  | 0.07600     | 0.0580                     |
| H20C | 0.43140    | 0.16920  | 0.15310     | 0.0580                     |
| H24A | 0.47070    | 0.37950  | 0.04120     | 0.0640                     |
| H24B | 0.38990    | 0.42440  | 0.01620     | 0.0640                     |
| H24C | 0.41060    | 0.31970  | -0.00860    | 0.0640                     |
| H101 | 0.203(2)   | 0.417(3) | 0.0092(19)  | 0.040(11)                  |
| H132 | 0.34070    | 0.28480  | 0.31050     | 0.0470                     |

Table S3 - Hydrogen Atom Positions and Isotropic Displacement Parameters (continued)  
for [9-(OMe)-8,8-(PMe2Ph)2-NIDO-8,7-PtCB9H11] (2)

| Atom | x          | y        | z          | U(iso) [Ang <sup>2</sup> ] |
|------|------------|----------|------------|----------------------------|
| H133 | 0.41890    | 0.16660  | 0.36670    | 0.0630                     |
| H134 | 0.42440    | 0.01330  | 0.32220    | 0.0660                     |
| H135 | 0.35250    | -0.02440 | 0.22130    | 0.0640                     |
| H136 | 0.27620    | 0.09480  | 0.16390    | 0.0480                     |
| H232 | 0.38010    | 0.51230  | 0.11270    | 0.0340                     |
| H233 | 0.41400    | 0.62270  | 0.19750    | 0.0390                     |
| H234 | 0.46700    | 0.56740  | 0.30120    | 0.0400                     |
| H235 | 0.49530    | 0.40340  | 0.31760    | 0.0400                     |
| H236 | 0.46710    | 0.29300  | 0.23170    | 0.0330                     |
| H1B  | 0.06100    | 0.39480  | 0.42680    | 0.0360                     |
| H2B  | 0.090(2)   | 0.337(3) | 0.5614(19) | 0.043(11)                  |
| H3B  | 0.00970    | 0.20880  | 0.46170    | 0.0360                     |
| H4B  | 0.08730    | 0.21370  | 0.34640    | 0.0410                     |
| H5B  | 0.18880    | 0.37280  | 0.36430    | 0.0370                     |
| H6B  | 0.20880    | 0.44210  | 0.50130    | 0.0320                     |
| H9B  | 0.1153(18) | 0.060(2) | 0.4275(17) | 0.028(9)                   |
| H10B | 0.2438(19) | 0.160(3) | 0.3885(18) | 0.035(10)                  |
| H11B | 0.2990(18) | 0.308(2) | 0.4631(16) | 0.018(8)                   |
| H17A | 0.41220    | 0.37450  | 0.61710    | 0.0500                     |
| H17B | 0.40870    | 0.36110  | 0.54020    | 0.0500                     |
| H17C | 0.47490    | 0.31250  | 0.59040    | 0.0500                     |
| H30A | 0.06120    | -0.00550 | 0.53930    | 0.0820                     |
| H30B | 0.10250    | -0.02400 | 0.61260    | 0.0820                     |
| H30C | 0.15000    | -0.01570 | 0.55490    | 0.0820                     |
| H31A | 0.09510    | 0.23190  | 0.67100    | 0.0450                     |

Table S3 - Hydrogen Atom Positions and Isotropic Displacement Parameters (continued)  
for [9-(OMe)-8,8-(PMe2Ph)2-NIDO-8,7-PtCB9H11] (2)

| Atom | x        | y        | z          | U(iso) [Ang^2] |
|------|----------|----------|------------|----------------|
| H31B | 0.11750  | 0.34420  | 0.67210    | 0.0450         |
| H31C | 0.13410  | 0.28150  | 0.73780    | 0.0450         |
| H32A | 0.29310  | 0.11740  | 0.71880    | 0.0450         |
| H32B | 0.20990  | 0.08320  | 0.69060    | 0.0450         |
| H32C | 0.22730  | 0.14010  | 0.75860    | 0.0450         |
| H41A | 0.44730  | 0.13520  | 0.52990    | 0.0510         |
| H41B | 0.37870  | 0.17680  | 0.47880    | 0.0510         |
| H41C | 0.36800  | 0.08210  | 0.52070    | 0.0510         |
| H89  | 0.181(2) | 0.122(2) | 0.4906(19) | 0.038(11)      |
| H332 | 0.27120  | 0.43740  | 0.64490    | 0.0370         |
| H333 | 0.34960  | 0.55460  | 0.70110    | 0.0440         |
| H334 | 0.40870  | 0.52580  | 0.80820    | 0.0460         |
| H335 | 0.38810  | 0.38100  | 0.85880    | 0.0500         |
| H336 | 0.30840  | 0.26450  | 0.80430    | 0.0410         |
| H432 | 0.44330  | 0.27910  | 0.71320    | 0.0440         |
| H433 | 0.48950  | 0.19680  | 0.80970    | 0.0630         |
| H434 | 0.48420  | 0.02840  | 0.81260    | 0.0760         |
| H435 | 0.42870  | -0.05800 | 0.72160    | 0.0660         |
| H436 | 0.38160  | 0.02330  | 0.62470    | 0.0470         |

=====

The Temperature Factor has the Form of  $\text{Exp}(-T)$  Where  
 $T = 8 * (\text{Pi}^{**2}) * U * (\text{Sin}(\text{Theta}) / \text{Lambda})^{**2}$  for Isotropic Atoms

Table S4 - (An)isotropic Displacement Parameters  
for [9-(OMe)-8,8-(PMe2Ph)2-NIDO-8,7-PtCB9H11] (2)

| Atom | U(1,1) or U | U(2,2)     | U(3,3)     | U(2,3)      | U(1,3)      | U(1,2)      |
|------|-------------|------------|------------|-------------|-------------|-------------|
| Pt7A | 0.0177(1)   | 0.0274(1)  | 0.0176(1)  | -0.0049(1)  | 0.0024(1)   | 0.0006(1)   |
| P1   | 0.0250(5)   | 0.0276(5)  | 0.0184(5)  | -0.0013(4)  | 0.0058(4)   | -0.0009(3)  |
| P2   | 0.0194(4)   | 0.0350(5)  | 0.0218(5)  | -0.0054(4)  | 0.0037(4)   | -0.0012(3)  |
| O11A | 0.0423(16)  | 0.0330(14) | 0.0348(17) | 0.0000(11)  | 0.0120(13)  | 0.0080(11)  |
| C8A  | 0.026(2)    | 0.057(3)   | 0.024(2)   | -0.0193(18) | 0.0069(17)  | -0.0040(17) |
| C11  | 0.031(2)    | 0.041(2)   | 0.026(2)   | 0.0042(16)  | 0.0087(17)  | -0.0015(16) |
| C11A | 0.120(5)    | 0.037(3)   | 0.081(4)   | 0.005(3)    | 0.043(4)    | 0.027(3)    |
| C12  | 0.030(2)    | 0.039(2)   | 0.025(2)   | -0.0082(16) | 0.0067(17)  | -0.0008(15) |
| C21  | 0.0222(19)  | 0.040(2)   | 0.053(3)   | -0.0117(19) | 0.0031(19)  | 0.0017(15)  |
| C22  | 0.037(2)    | 0.067(3)   | 0.026(2)   | -0.0051(19) | 0.0131(19)  | -0.0137(19) |
| C131 | 0.0271(19)  | 0.037(2)   | 0.024(2)   | 0.0099(15)  | 0.0094(16)  | -0.0013(15) |
| C132 | 0.039(2)    | 0.054(3)   | 0.024(2)   | 0.0079(18)  | 0.0059(19)  | -0.0010(18) |
| C133 | 0.036(2)    | 0.086(4)   | 0.035(3)   | 0.027(2)    | 0.002(2)    | -0.002(2)   |
| C134 | 0.036(2)    | 0.068(3)   | 0.064(4)   | 0.039(3)    | 0.018(3)    | 0.015(2)    |
| C135 | 0.050(3)    | 0.043(3)   | 0.070(4)   | 0.014(2)    | 0.022(3)    | 0.016(2)    |
| C136 | 0.037(2)    | 0.040(2)   | 0.042(3)   | 0.0056(19)  | 0.008(2)    | 0.0024(17)  |
| C231 | 0.0168(16)  | 0.0318(18) | 0.0199(19) | -0.0007(14) | 0.0049(15)  | -0.0023(13) |
| C232 | 0.0271(19)  | 0.0316(19) | 0.026(2)   | 0.0042(15)  | 0.0008(16)  | 0.0020(14)  |
| C233 | 0.031(2)    | 0.0290(19) | 0.037(2)   | -0.0030(16) | 0.0044(18)  | -0.0021(15) |
| C234 | 0.029(2)    | 0.038(2)   | 0.032(2)   | -0.0123(17) | 0.0027(18)  | -0.0023(15) |
| C235 | 0.026(2)    | 0.052(2)   | 0.020(2)   | -0.0003(17) | -0.0023(17) | 0.0037(16)  |
| C236 | 0.0251(18)  | 0.0308(19) | 0.026(2)   | 0.0020(15)  | 0.0027(16)  | 0.0040(14)  |
| B1A  | 0.027(2)    | 0.064(3)   | 0.031(3)   | -0.014(2)   | 0.000(2)    | -0.005(2)   |
| B2A  | 0.024(2)    | 0.040(2)   | 0.028(2)   | -0.0073(18) | 0.0034(19)  | -0.0027(17) |
| B3A  | 0.028(2)    | 0.042(3)   | 0.033(3)   | -0.017(2)   | 0.002(2)    | 0.0002(18)  |
| B4A  | 0.034(3)    | 0.088(4)   | 0.027(3)   | -0.026(3)   | 0.003(2)    | -0.011(2)   |

Table S4 - (An)isotropic Displacement Parameters (continued)  
for [9-(OMe)-8,8-(PMe2Ph)2-NIDO-8,7-PtCB9H11] (2)

| Atom | U(1,1) or U | U(2,2)     | U(3,3)     | U(2,3)      | U(1,3)     | U(1,2)      |
|------|-------------|------------|------------|-------------|------------|-------------|
| ---- | -----       | -----      | -----      | -----       | -----      | -----       |
| B5A  | 0.034(3)    | 0.091(4)   | 0.020(3)   | -0.001(3)   | -0.001(2)  | -0.005(3)   |
| B6A  | 0.025(2)    | 0.062(3)   | 0.034(3)   | 0.005(2)    | -0.003(2)  | 0.006(2)    |
| B9A  | 0.035(3)    | 0.075(4)   | 0.021(3)   | -0.006(2)   | 0.008(2)   | -0.013(2)   |
| B10A | 0.039(3)    | 0.050(3)   | 0.032(3)   | 0.008(2)    | 0.001(2)   | 0.002(2)    |
| B11A | 0.024(2)    | 0.037(2)   | 0.029(2)   | 0.0022(18)  | 0.0036(19) | 0.0045(16)  |
| Pt7B | 0.0190(1)   | 0.0237(1)  | 0.0161(1)  | -0.0002(1)  | 0.0047(1)  | -0.0021(1)  |
| P3   | 0.0243(5)   | 0.0271(5)  | 0.0168(5)  | -0.0004(3)  | 0.0072(4)  | -0.0022(3)  |
| P4   | 0.0200(4)   | 0.0275(5)  | 0.0225(5)  | -0.0020(4)  | 0.0062(4)  | -0.0019(3)  |
| O8B  | 0.0355(14)  | 0.0249(12) | 0.0253(14) | -0.0022(10) | 0.0118(12) | -0.0065(10) |
| C8B  | 0.095(4)    | 0.031(2)   | 0.046(3)   | -0.0002(19) | 0.035(3)   | -0.013(2)   |
| C11B | 0.033(2)    | 0.036(2)   | 0.0193(19) | 0.0090(15)  | 0.0048(17) | -0.0050(16) |
| C31  | 0.029(2)    | 0.038(2)   | 0.026(2)   | -0.0037(16) | 0.0117(17) | 0.0016(15)  |
| C32  | 0.036(2)    | 0.0283(19) | 0.029(2)   | 0.0049(15)  | 0.0127(17) | -0.0004(15) |
| C41  | 0.034(2)    | 0.042(2)   | 0.029(2)   | -0.0058(17) | 0.0121(18) | 0.0025(16)  |
| C42  | 0.0280(19)  | 0.038(2)   | 0.035(2)   | -0.0012(17) | 0.0081(18) | -0.0096(15) |
| C331 | 0.0216(17)  | 0.0343(19) | 0.0204(19) | -0.0036(15) | 0.0053(15) | -0.0024(14) |
| C332 | 0.032(2)    | 0.0302(19) | 0.030(2)   | -0.0029(16) | 0.0086(18) | -0.0005(15) |
| C333 | 0.036(2)    | 0.032(2)   | 0.042(3)   | -0.0035(17) | 0.009(2)   | -0.0065(16) |
| C334 | 0.034(2)    | 0.042(2)   | 0.040(3)   | -0.0169(18) | 0.010(2)   | -0.0127(17) |
| C335 | 0.044(2)    | 0.061(3)   | 0.019(2)   | -0.0082(19) | 0.0053(19) | -0.008(2)   |
| C336 | 0.039(2)    | 0.042(2)   | 0.023(2)   | -0.0024(16) | 0.0108(18) | -0.0088(17) |
| C431 | 0.0194(17)  | 0.036(2)   | 0.027(2)   | 0.0032(15)  | 0.0061(16) | 0.0057(14)  |
| C432 | 0.0220(19)  | 0.056(2)   | 0.032(2)   | -0.0006(18) | 0.0044(17) | -0.0012(16) |
| C433 | 0.032(2)    | 0.095(4)   | 0.027(2)   | 0.004(2)    | -0.006(2)  | 0.005(2)    |
| C434 | 0.045(3)    | 0.098(4)   | 0.045(3)   | 0.033(3)    | 0.004(3)   | 0.030(3)    |

Table S4 - (An)isotropic Displacement Parameters (continued)  
for [9-(OMe)-8,8-(PMe2Ph)2-NIDO-8,7-PtCB9H11] (2)

| Atom | U(1,1) or U | U(2,2)   | U(3,3)   | U(2,3)      | U(1,3)     | U(1,2)      |
|------|-------------|----------|----------|-------------|------------|-------------|
| C435 | 0.049(3)    | 0.056(3) | 0.063(4) | 0.027(3)    | 0.020(3)   | 0.023(2)    |
| C436 | 0.036(2)    | 0.040(2) | 0.044(3) | 0.0056(18)  | 0.015(2)   | 0.0110(17)  |
| B1B  | 0.030(2)    | 0.035(2) | 0.024(2) | 0.0067(17)  | 0.0003(19) | 0.0006(17)  |
| B2B  | 0.021(2)    | 0.029(2) | 0.027(2) | 0.0019(17)  | 0.0052(18) | -0.0006(15) |
| B3B  | 0.028(2)    | 0.038(2) | 0.023(2) | 0.0010(18)  | 0.0042(19) | -0.0054(17) |
| B4B  | 0.036(2)    | 0.048(3) | 0.017(2) | 0.0009(19)  | 0.003(2)   | -0.0091(19) |
| B5B  | 0.029(2)    | 0.044(2) | 0.018(2) | 0.0065(18)  | 0.0009(18) | -0.0070(18) |
| B6B  | 0.030(2)    | 0.031(2) | 0.020(2) | 0.0019(16)  | 0.0057(18) | -0.0019(16) |
| B8B  | 0.0214(19)  | 0.030(2) | 0.024(2) | -0.0034(16) | 0.0050(17) | -0.0038(15) |
| B9B  | 0.029(2)    | 0.037(2) | 0.025(2) | -0.0052(18) | 0.004(2)   | -0.0067(17) |
| B10B | 0.040(2)    | 0.039(2) | 0.022(2) | -0.0007(18) | 0.013(2)   | -0.0033(19) |

=====

The Temperature Factor has the Form of  $\text{Exp}(-T)$  Where  
 $T = 8 \cdot (\text{Pi}^2) \cdot U \cdot (\text{Sin}(\text{Theta}) / \text{Lambda})^2$  for Isotropic Atoms  
 $T = 2 \cdot (\text{Pi}^2) \cdot \text{Sum}_{ij} (h(i) \cdot h(j) \cdot U(i,j) \cdot \text{Astar}(i) \cdot \text{Astar}(j))$ , for  
Anisotropic Atoms.  $\text{Astar}(i)$  are Reciprocal Axial Lengths and  
 $h(i)$  are the Reflection Indices.

Table S5 - Bond Distances (Angstrom)  
for [9-(OMe)-8,8-(PMe2Ph)2-NIDO-8,7-PtCB9H11] (2)

|      |       |            |      |       |          |
|------|-------|------------|------|-------|----------|
| Pt7A | -P1   | 2.2720(9)  | C8A  | -B3A  | 1.644(6) |
| Pt7A | -P2   | 2.3507(10) | C8A  | -B4A  | 1.668(6) |
| Pt7A | -C8A  | 2.159(4)   | C8A  | -B9A  | 1.586(7) |
| Pt7A | -B2A  | 2.255(4)   | C8A  | -H8A  | 1.01(4)  |
| Pt7A | -B3A  | 2.303(4)   | C11  | -H11I | 0.9800   |
| Pt7A | -B11A | 2.314(4)   | C11  | -H11H | 0.9800   |
| Pt7B | -P4   | 2.3461(10) | C11  | -H11G | 0.9800   |
| Pt7B | -C11B | 2.168(4)   | C11A | -H11F | 0.9800   |
| Pt7B | -B2B  | 2.248(4)   | C11A | -H11D | 0.9800   |
| Pt7B | -B6B  | 2.276(4)   | C11A | -H11E | 0.9800   |
| Pt7B | -B8B  | 2.304(4)   | C12  | -H12E | 0.9800   |
| Pt7B | -P3   | 2.2754(9)  | C12  | -H12D | 0.9800   |
| P1   | -C11  | 1.815(4)   | C12  | -H12F | 0.9800   |
| P1   | -C12  | 1.806(4)   | C21  | -H20A | 0.9800   |
| P1   | -C131 | 1.820(4)   | C21  | -H20B | 0.9800   |
| P2   | -C231 | 1.826(3)   | C21  | -H20C | 0.9800   |
| P2   | -C22  | 1.824(4)   | C22  | -H24A | 0.9800   |
| P2   | -C21  | 1.814(4)   | C22  | -H24B | 0.9800   |
| P3   | -C32  | 1.803(3)   | C22  | -H24C | 0.9800   |
| P3   | -C31  | 1.817(4)   | C131 | -C136 | 1.388(6) |
| P3   | -C331 | 1.824(3)   | C131 | -C132 | 1.384(5) |
| P4   | -C41  | 1.816(4)   | C132 | -C133 | 1.393(6) |
| P4   | -C42  | 1.816(4)   | C133 | -C134 | 1.369(8) |
| P4   | -C431 | 1.810(4)   | C134 | -C135 | 1.382(8) |
| O11A | -C11A | 1.435(5)   | C135 | -C136 | 1.392(6) |
| O11A | -B11A | 1.375(5)   | C11B | -B5B  | 1.678(5) |
| O8B  | -C8B  | 1.429(5)   | C11B | -B10B | 1.592(6) |
| O8B  | -B8B  | 1.388(5)   | C11B | -B6B  | 1.645(6) |



Table S5 - Bond Distances (Angstrom) (continued)  
for [9-(OMe)-8,8-(PMe2Ph)2-NIDO-8,7-PtCB9H11] (2)

|      |       |          |      |       |          |
|------|-------|----------|------|-------|----------|
| C231 | -C236 | 1.389(5) | C41  | -H41C | 0.9800   |
| C231 | -C232 | 1.397(4) | C42  | -H17A | 0.9800   |
| C232 | -C233 | 1.384(5) | C42  | -H17C | 0.9800   |
| C132 | -H132 | 0.9500   | C42  | -H17B | 0.9800   |
| C233 | -C234 | 1.382(6) | C331 | -C336 | 1.378(5) |
| C133 | -H133 | 0.9500   | C331 | -C332 | 1.396(4) |
| C134 | -H134 | 0.9500   | C332 | -C333 | 1.385(5) |
| C234 | -C235 | 1.384(6) | C333 | -C334 | 1.381(6) |
| C235 | -C236 | 1.388(5) | C334 | -C335 | 1.370(6) |
| C135 | -H135 | 0.9500   | C335 | -C336 | 1.382(6) |
| C136 | -H136 | 0.9500   | C431 | -C436 | 1.388(5) |
| C8B  | -H30B | 0.9800   | C431 | -C432 | 1.390(5) |
| C8B  | -H30C | 0.9800   | C432 | -C433 | 1.383(6) |
| C8B  | -H30A | 0.9800   | C332 | -H332 | 0.9500   |
| C11B | -H11B | 0.97(3)  | C433 | -C434 | 1.376(8) |
| C31  | -H31B | 0.9800   | C333 | -H333 | 0.9500   |
| C31  | -H31C | 0.9800   | C334 | -H334 | 0.9500   |
| C31  | -H31A | 0.9800   | C434 | -C435 | 1.371(8) |
| C32  | -H32B | 0.9800   | C335 | -H335 | 0.9500   |
| C32  | -H32C | 0.9800   | C435 | -C436 | 1.385(7) |
| C32  | -H32A | 0.9800   | C336 | -H336 | 0.9500   |
| C232 | -H232 | 0.9500   | C432 | -H432 | 0.9500   |
| C233 | -H233 | 0.9500   | C433 | -H433 | 0.9500   |
| C234 | -H234 | 0.9500   | C434 | -H434 | 0.9500   |
| C235 | -H235 | 0.9500   | C435 | -H435 | 0.9500   |
| C236 | -H236 | 0.9500   | C436 | -H436 | 0.9500   |
| C41  | -H41B | 0.9800   | B1A  | -B4A  | 1.751(7) |

|     |       |        |     |      |          |
|-----|-------|--------|-----|------|----------|
| C41 | -H41A | 0.9800 | B1A | -B6A | 1.765(7) |
|-----|-------|--------|-----|------|----------|

- 14 -

Table S5 - Bond Distances (Angstrom) (continued)  
for [9-(OMe)-8,8-(PMe2Ph)2-NIDO-8,7-PtCB9H11] (2)

|      |       |          |      |       |          |
|------|-------|----------|------|-------|----------|
| B1A  | -B3A  | 1.760(6) | B1B  | -B3B  | 1.768(6) |
| B1A  | -B2A  | 1.778(6) | B1B  | -B6B  | 1.769(5) |
| B1A  | -B5A  | 1.815(7) | B1B  | -B4B  | 1.801(6) |
| B2A  | -B6A  | 1.784(6) | B1B  | -B5B  | 1.746(5) |
| B2A  | -B11A | 1.814(6) | B2B  | -B3B  | 1.781(6) |
| B2A  | -B3A  | 1.865(6) | B2B  | -B6B  | 1.868(6) |
| B3A  | -B4A  | 1.757(6) | B2B  | -B8B  | 1.807(6) |
| B4A  | -B9A  | 1.806(8) | B3B  | -B4B  | 1.796(6) |
| B4A  | -B5A  | 1.736(8) | B3B  | -B9B  | 1.794(6) |
| B5A  | -B9A  | 1.757(8) | B3B  | -B8B  | 1.745(6) |
| B5A  | -B10A | 1.758(8) | B4B  | -B9B  | 1.760(6) |
| B5A  | -B6A  | 1.806(6) | B4B  | -B10B | 1.764(8) |
| B6A  | -B10A | 1.786(7) | B4B  | -B5B  | 1.745(6) |
| B6A  | -B11A | 1.738(6) | B5B  | -B10B | 1.800(6) |
| B9A  | -B10A | 1.955(8) | B5B  | -B6B  | 1.764(6) |
| B10A | -B11A | 1.813(7) | B8B  | -B9B  | 1.824(6) |
| B1A  | -H1A  | 1.1200   | B9B  | -B10B | 1.948(6) |
| B2A  | -H2A  | 1.1200   | B1B  | -H1B  | 1.1200   |
| B3A  | -H3A  | 1.1200   | B2B  | -H2B  | 1.10(4)  |
| B4A  | -H4A  | 1.1200   | B3B  | -H3B  | 1.1200   |
| B5A  | -H5A  | 1.1200   | B4B  | -H4B  | 1.1200   |
| B6A  | -H6A  | 1.1200   | B5B  | -H5B  | 1.1200   |
| B9A  | -H9A  | 1.13(3)  | B6B  | -H6B  | 1.1200   |
| B10A | -H10A | 1.07(4)  | B8B  | -H89  | 1.53(4)  |
| B10A | -H101 | 1.14(4)  | B9B  | -H9B  | 1.09(3)  |
| B11A | -H101 | 1.52(4)  | B9B  | -H89  | 1.10(4)  |
| B1B  | -B2B  | 1.779(6) | B10B | -H10B | 1.07(4)  |



Table S6 - Bond Angles (Degrees)  
for [9-(OMe)-8,8-(PMe2Ph)2-NIDO-8,7-PtCB9H11] (2)

|      |       |       |            |      |       |       |            |
|------|-------|-------|------------|------|-------|-------|------------|
| P1   | -Pt7A | -P2   | 96.08(4)   | P3   | -Pt7B | -P4   | 96.55(4)   |
| P1   | -Pt7A | -C8A  | 171.76(11) | P3   | -Pt7B | -C11B | 171.50(11) |
| P1   | -Pt7A | -B2A  | 95.52(11)  | C11  | -P1   | -C131 | 102.48(18) |
| P1   | -Pt7A | -B3A  | 129.50(10) | Pt7A | -P1   | -C11  | 117.17(13) |
| P1   | -Pt7A | -B11A | 89.97(10)  | Pt7A | -P1   | -C12  | 118.98(13) |
| P2   | -Pt7A | -C8A  | 87.37(10)  | Pt7A | -P1   | -C131 | 108.29(12) |
| P2   | -Pt7A | -B2A  | 168.00(11) | C11  | -P1   | -C12  | 101.61(18) |
| P2   | -Pt7A | -B3A  | 120.64(10) | C12  | -P1   | -C131 | 106.70(18) |
| P2   | -Pt7A | -B11A | 136.27(10) | C22  | -P2   | -C231 | 101.94(17) |
| C8A  | -Pt7A | -B2A  | 80.73(14)  | Pt7A | -P2   | -C21  | 113.79(13) |
| C8A  | -Pt7A | -B3A  | 43.09(14)  | Pt7A | -P2   | -C22  | 113.88(13) |
| C8A  | -Pt7A | -B11A | 92.70(14)  | Pt7A | -P2   | -C231 | 116.49(11) |
| B2A  | -Pt7A | -B3A  | 48.30(14)  | C21  | -P2   | -C22  | 103.22(18) |
| B2A  | -Pt7A | -B11A | 46.76(14)  | C21  | -P2   | -C231 | 106.02(17) |
| B3A  | -Pt7A | -B11A | 85.89(14)  | Pt7B | -P3   | -C31  | 117.37(12) |
| P3   | -Pt7B | -B2B  | 95.35(11)  | C31  | -P3   | -C32  | 101.52(18) |
| P3   | -Pt7B | -B6B  | 128.90(10) | Pt7B | -P3   | -C32  | 118.52(12) |
| P3   | -Pt7B | -B8B  | 91.47(10)  | Pt7B | -P3   | -C331 | 108.51(11) |
| P4   | -Pt7B | -C11B | 87.01(10)  | C31  | -P3   | -C331 | 102.50(17) |
| P4   | -Pt7B | -B2B  | 167.56(11) | C32  | -P3   | -C331 | 106.87(16) |
| P4   | -Pt7B | -B6B  | 119.70(10) | Pt7B | -P4   | -C42  | 111.64(12) |
| P4   | -Pt7B | -B8B  | 136.27(10) | Pt7B | -P4   | -C41  | 112.37(13) |
| C11B | -Pt7B | -B2B  | 80.72(14)  | C41  | -P4   | -C431 | 103.26(17) |
| C11B | -Pt7B | -B6B  | 43.36(14)  | Pt7B | -P4   | -C431 | 119.53(12) |
| C11B | -Pt7B | -B8B  | 91.26(14)  | C41  | -P4   | -C42  | 103.82(18) |
| B2B  | -Pt7B | -B6B  | 48.77(14)  | C42  | -P4   | -C431 | 104.73(16) |
| B2B  | -Pt7B | -B8B  | 46.77(15)  | C11A | -O11A | -B11A | 119.2(3)   |
| B6B  | -Pt7B | -B8B  | 85.89(14)  | C8B  | -O8B  | -B8B  | 119.9(3)   |

Table S6 - Bond Angles (Degrees) (continued)  
for [9-(OMe)-8,8-(PMe2Ph)2-NIDO-8,7-PtCB9H11] (2)

|      |       |       |          |      |       |       |          |
|------|-------|-------|----------|------|-------|-------|----------|
| B3A  | -C8A  | -B9A  | 116.2(3) | P2   | -C21  | -H20B | 109.00   |
| B4A  | -C8A  | -B9A  | 67.4(3)  | P2   | -C21  | -H20A | 109.00   |
| Pt7A | -C8A  | -B9A  | 108.2(3) | H20A | -C21  | -H20C | 109.00   |
| Pt7A | -C8A  | -B3A  | 73.1(2)  | H20B | -C21  | -H20C | 109.00   |
| Pt7A | -C8A  | -B4A  | 126.4(3) | H20A | -C21  | -H20B | 109.00   |
| B3A  | -C8A  | -B4A  | 64.1(3)  | P2   | -C21  | -H20C | 109.00   |
| B3A  | -C8A  | -H8A  | 119(2)   | P2   | -C22  | -H24B | 110.00   |
| B9A  | -C8A  | -H8A  | 118(2)   | H24A | -C22  | -H24B | 109.00   |
| B4A  | -C8A  | -H8A  | 116(2)   | P2   | -C22  | -H24C | 109.00   |
| Pt7A | -C8A  | -H8A  | 112(2)   | H24A | -C22  | -H24C | 109.00   |
| P1   | -C11  | -H11G | 109.00   | H24B | -C22  | -H24C | 109.00   |
| H11G | -C11  | -H11I | 109.00   | P2   | -C22  | -H24A | 109.00   |
| P1   | -C11  | -H11H | 109.00   | C132 | -C131 | -C136 | 118.9(4) |
| H11G | -C11  | -H11H | 110.00   | P1   | -C131 | -C136 | 117.9(3) |
| P1   | -C11  | -H11I | 109.00   | P1   | -C131 | -C132 | 123.1(3) |
| H11H | -C11  | -H11I | 110.00   | C131 | -C132 | -C133 | 120.5(4) |
| H11D | -C11A | -H11E | 109.00   | C132 | -C133 | -C134 | 119.9(4) |
| O11A | -C11A | -H11F | 109.00   | C133 | -C134 | -C135 | 120.6(5) |
| O11A | -C11A | -H11E | 109.00   | C134 | -C135 | -C136 | 119.4(4) |
| H11E | -C11A | -H11F | 109.00   | C131 | -C136 | -C135 | 120.7(4) |
| H11D | -C11A | -H11F | 109.00   | Pt7B | -C11B | -B5B  | 126.2(2) |
| O11A | -C11A | -H11D | 110.00   | B5B  | -C11B | -B6B  | 64.1(2)  |
| H12D | -C12  | -H12F | 109.00   | Pt7B | -C11B | -B6B  | 71.8(2)  |
| P1   | -C12  | -H12D | 110.00   | Pt7B | -C11B | -B10B | 111.2(3) |
| P1   | -C12  | -H12F | 109.00   | B5B  | -C11B | -B10B | 66.8(3)  |
| H12D | -C12  | -H12E | 109.00   | B6B  | -C11B | -B10B | 116.5(3) |
| H12E | -C12  | -H12F | 109.00   | P2   | -C231 | -C236 | 123.0(2) |
| P1   | -C12  | -H12E | 109.00   | P2   | -C231 | -C232 | 117.7(3) |

Table S6 - Bond Angles (Degrees) (continued)  
for [9-(OMe)-8,8-(PMe2Ph)2-NIDO-8,7-PtCB9H11] (2)

|      |       |       |           |      |       |       |        |
|------|-------|-------|-----------|------|-------|-------|--------|
| C232 | -C231 | -C236 | 119.1(3)  | P3   | -C31  | -H31A | 109.00 |
| C131 | -C132 | -H132 | 120.00    | H31A | -C31  | -H31B | 110.00 |
| C231 | -C232 | -C233 | 120.6(3)  | H31B | -C31  | -H31C | 109.00 |
| C133 | -C132 | -H132 | 120.00    | H31A | -C31  | -H31C | 109.00 |
| C134 | -C133 | -H133 | 120.00    | H32A | -C32  | -H32B | 109.00 |
| C132 | -C133 | -H133 | 120.00    | P3   | -C32  | -H32B | 110.00 |
| C232 | -C233 | -C234 | 119.8(4)  | H32A | -C32  | -H32C | 109.00 |
| C135 | -C134 | -H134 | 120.00    | C233 | -C232 | -H232 | 120.00 |
| C133 | -C134 | -H134 | 120.00    | P3   | -C32  | -H32C | 109.00 |
| C233 | -C234 | -C235 | 119.9(4)  | C231 | -C232 | -H232 | 120.00 |
| C234 | -C235 | -C236 | 120.5(3)  | P3   | -C32  | -H32A | 109.00 |
| C134 | -C135 | -H135 | 120.00    | H32B | -C32  | -H32C | 109.00 |
| C136 | -C135 | -H135 | 120.00    | C234 | -C233 | -H233 | 120.00 |
| C231 | -C236 | -C235 | 120.0(3)  | C232 | -C233 | -H233 | 120.00 |
| C131 | -C136 | -H136 | 120.00    | C235 | -C234 | -H234 | 120.00 |
| C135 | -C136 | -H136 | 120.00    | C233 | -C234 | -H234 | 120.00 |
| H30A | -C8B  | -H30C | 110.00    | C236 | -C235 | -H235 | 120.00 |
| O8B  | -C8B  | -H30B | 109.00    | C234 | -C235 | -H235 | 120.00 |
| H30B | -C8B  | -H30C | 109.00    | C235 | -C236 | -H236 | 120.00 |
| H30A | -C8B  | -H30B | 109.00    | C231 | -C236 | -H236 | 120.00 |
| O8B  | -C8B  | -H30C | 109.00    | H41B | -C41  | -H41C | 109.00 |
| O8B  | -C8B  | -H30A | 109.00    | P4   | -C41  | -H41B | 109.00 |
| Pt7B | -C11B | -H11B | 111(2)    | H41A | -C41  | -H41C | 110.00 |
| B5B  | -C11B | -H11B | 115.8(19) | P4   | -C41  | -H41C | 109.00 |
| B10B | -C11B | -H11B | 119.6(18) | H41A | -C41  | -H41B | 110.00 |
| B6B  | -C11B | -H11B | 116.8(17) | P4   | -C41  | -H41A | 109.00 |
| P3   | -C31  | -H31B | 109.00    | H17B | -C42  | -H17C | 110.00 |
| P3   | -C31  | -H31C | 109.00    | P4   | -C42  | -H17C | 110.00 |

Table S6 - Bond Angles (Degrees) (continued)  
for [9-(OMe)-8,8-(PMe2Ph)2-NIDO-8,7-PtCB9H11] (2)

|      |       |       |          |      |       |       |           |
|------|-------|-------|----------|------|-------|-------|-----------|
| H17A | -C42  | -H17B | 109.00   | C335 | -C336 | -H336 | 120.00    |
| P4   | -C42  | -H17A | 110.00   | C431 | -C436 | -C435 | 120.2(4)  |
| H17A | -C42  | -H17C | 109.00   | C431 | -C432 | -H432 | 120.00    |
| P4   | -C42  | -H17B | 109.00   | C433 | -C432 | -H432 | 120.00    |
| P3   | -C331 | -C332 | 118.3(3) | C432 | -C433 | -H433 | 120.00    |
| C332 | -C331 | -C336 | 119.1(3) | C434 | -C433 | -H433 | 120.00    |
| P3   | -C331 | -C336 | 122.6(3) | C435 | -C434 | -H434 | 120.00    |
| C331 | -C332 | -C333 | 120.0(4) | C433 | -C434 | -H434 | 120.00    |
| C332 | -C333 | -C334 | 120.2(4) | C436 | -C435 | -H435 | 120.00    |
| C333 | -C334 | -C335 | 119.5(4) | C434 | -C435 | -H435 | 120.00    |
| C334 | -C335 | -C336 | 120.9(4) | C435 | -C436 | -H436 | 120.00    |
| C331 | -C336 | -C335 | 120.2(4) | C431 | -C436 | -H436 | 120.00    |
| C432 | -C431 | -C436 | 119.0(3) | B3A  | -B1A  | -B4A  | 60.1(2)   |
| P4   | -C431 | -C432 | 121.8(2) | B2A  | -B1A  | -B6A  | 60.5(2)   |
| P4   | -C431 | -C436 | 119.1(3) | B2A  | -B1A  | -B3A  | 63.6(2)   |
| C431 | -C432 | -C433 | 120.5(4) | B2A  | -B1A  | -B4A  | 111.8(3)  |
| C331 | -C332 | -H332 | 120.00   | B2A  | -B1A  | -B5A  | 105.8(3)  |
| C333 | -C332 | -H332 | 120.00   | B5A  | -B1A  | -B6A  | 60.6(3)   |
| C334 | -C333 | -H333 | 120.00   | B4A  | -B1A  | -B6A  | 111.6(4)  |
| C432 | -C433 | -C434 | 119.7(4) | B3A  | -B1A  | -B5A  | 104.5(3)  |
| C332 | -C333 | -H333 | 120.00   | B4A  | -B1A  | -B5A  | 58.2(3)   |
| C433 | -C434 | -C435 | 120.6(5) | B3A  | -B1A  | -B6A  | 112.4(3)  |
| C335 | -C334 | -H334 | 120.00   | B1A  | -B2A  | -B6A  | 59.4(3)   |
| C333 | -C334 | -H334 | 120.00   | B1A  | -B2A  | -B11A | 109.7(3)  |
| C336 | -C335 | -H335 | 120.00   | Pt7A | -B2A  | -B6A  | 114.2(2)  |
| C334 | -C335 | -H335 | 119.00   | Pt7A | -B2A  | -B11A | 68.33(17) |
| C434 | -C435 | -C436 | 120.0(4) | Pt7A | -B2A  | -B3A  | 67.19(17) |
| C331 | -C336 | -H336 | 120.00   | B3A  | -B2A  | -B6A  | 106.7(3)  |

Table S6 - Bond Angles (Degrees) (continued)  
for [9-(OMe)-8,8-(PMe2Ph)2-NIDO-8,7-PtCB9H11] (2)

|      |      |       |           |      |       |       |          |
|------|------|-------|-----------|------|-------|-------|----------|
| B1A  | -B2A | -B3A  | 57.7(2)   | B1A  | -B5A  | -B9A  | 106.0(3) |
| B3A  | -B2A | -B11A | 117.5(3)  | B4A  | -B5A  | -B9A  | 62.3(3)  |
| Pt7A | -B2A | -B1A  | 115.5(2)  | B6A  | -B5A  | -B10A | 60.1(3)  |
| B6A  | -B2A | -B11A | 57.8(2)   | B4A  | -B5A  | -B6A  | 110.3(3) |
| Pt7A | -B3A | -B1A  | 114.0(3)  | B1A  | -B5A  | -B6A  | 58.3(3)  |
| B2A  | -B3A | -B4A  | 107.5(3)  | B9A  | -B5A  | -B10A | 67.6(3)  |
| Pt7A | -B3A | -B4A  | 114.2(3)  | B2A  | -B6A  | -B5A  | 105.9(3) |
| B1A  | -B3A | -B2A  | 58.6(2)   | B1A  | -B6A  | -B10A | 109.9(3) |
| Pt7A | -B3A | -B2A  | 64.52(17) | B2A  | -B6A  | -B10A | 107.5(3) |
| Pt7A | -B3A | -C8A  | 63.78(19) | B2A  | -B6A  | -B11A | 62.0(2)  |
| C8A  | -B3A | -B4A  | 58.6(3)   | B1A  | -B6A  | -B11A | 113.9(3) |
| C8A  | -B3A | -B2A  | 109.0(3)  | B1A  | -B6A  | -B2A  | 60.1(3)  |
| B1A  | -B3A | -B4A  | 59.7(3)   | B1A  | -B6A  | -B5A  | 61.1(3)  |
| C8A  | -B3A | -B1A  | 106.2(3)  | B5A  | -B6A  | -B10A | 58.6(3)  |
| B1A  | -B4A | -B3A  | 60.2(2)   | B5A  | -B6A  | -B11A | 110.2(3) |
| C8A  | -B4A | -B1A  | 105.6(3)  | B10A | -B6A  | -B11A | 61.9(3)  |
| B1A  | -B4A | -B5A  | 62.7(3)   | C8A  | -B9A  | -B4A  | 58.5(3)  |
| B1A  | -B4A | -B9A  | 106.7(4)  | B4A  | -B9A  | -B10A | 106.8(4) |
| C8A  | -B4A | -B9A  | 54.2(3)   | B5A  | -B9A  | -B10A | 56.2(3)  |
| B3A  | -B4A | -B5A  | 108.1(3)  | C8A  | -B9A  | -B10A | 116.1(3) |
| C8A  | -B4A | -B3A  | 57.3(2)   | B4A  | -B9A  | -B5A  | 58.3(3)  |
| C8A  | -B4A | -B5A  | 103.9(3)  | C8A  | -B9A  | -B5A  | 106.5(4) |
| B5A  | -B4A | -B9A  | 59.4(3)   | B5A  | -B10A | -B6A  | 61.3(3)  |
| B3A  | -B4A | -B9A  | 100.6(3)  | B5A  | -B10A | -B9A  | 56.2(3)  |
| B4A  | -B5A | -B10A | 119.6(4)  | B6A  | -B10A | -B9A  | 103.4(3) |
| B6A  | -B5A | -B9A  | 111.0(3)  | B6A  | -B10A | -B11A | 57.8(3)  |
| B1A  | -B5A | -B4A  | 59.0(3)   | B9A  | -B10A | -B11A | 108.1(3) |
| B1A  | -B5A | -B10A | 108.9(3)  | B5A  | -B10A | -B11A | 109.0(4) |



Table S6 - Bond Angles (Degrees) (continued)  
for [9-(OMe)-8,8-(PMe2Ph)2-NIDO-8,7-PtCB9H11] (2)

|      |       |       |           |      |       |       |           |
|------|-------|-------|-----------|------|-------|-------|-----------|
| O11A | -B11A | -B2A  | 127.9(3)  | B1A  | -B4A  | -H4A  | 121.00    |
| O11A | -B11A | -B6A  | 129.6(3)  | B3A  | -B4A  | -H4A  | 124.00    |
| Pt7A | -B11A | -B10A | 104.0(2)  | B4A  | -B5A  | -H5A  | 117.00    |
| Pt7A | -B11A | -B2A  | 64.91(17) | B1A  | -B5A  | -H5A  | 125.00    |
| Pt7A | -B11A | -B6A  | 113.4(3)  | B6A  | -B5A  | -H5A  | 122.00    |
| O11A | -B11A | -B10A | 124.1(3)  | B10A | -B5A  | -H5A  | 115.00    |
| Pt7A | -B11A | -O11A | 112.9(2)  | B9A  | -B5A  | -H5A  | 119.00    |
| B6A  | -B11A | -B10A | 60.4(3)   | B5A  | -B6A  | -H6A  | 123.00    |
| B2A  | -B11A | -B6A  | 60.3(3)   | B2A  | -B6A  | -H6A  | 123.00    |
| B2A  | -B11A | -B10A | 105.1(3)  | B10A | -B6A  | -H6A  | 122.00    |
| B6A  | -B1A  | -H1A  | 119.00    | B1A  | -B6A  | -H6A  | 119.00    |
| B3A  | -B1A  | -H1A  | 121.00    | B11A | -B6A  | -H6A  | 118.00    |
| B5A  | -B1A  | -H1A  | 126.00    | B10A | -B9A  | -H9A  | 116.7(15) |
| B2A  | -B1A  | -H1A  | 120.00    | C8A  | -B9A  | -H9A  | 119.7(17) |
| B4A  | -B1A  | -H1A  | 120.00    | B5A  | -B9A  | -H9A  | 126.1(19) |
| B1A  | -B2A  | -H2A  | 122.00    | B4A  | -B9A  | -H9A  | 126.3(16) |
| Pt7A | -B2A  | -H2A  | 112.00    | B6A  | -B10A | -H101 | 111(2)    |
| B3A  | -B2A  | -H2A  | 119.00    | B9A  | -B10A | -H10A | 118(2)    |
| B11A | -B2A  | -H2A  | 117.00    | B6A  | -B10A | -H10A | 127(2)    |
| B6A  | -B2A  | -H2A  | 124.00    | B5A  | -B10A | -H10A | 116(2)    |
| B1A  | -B3A  | -H3A  | 122.00    | B5A  | -B10A | -H101 | 126(2)    |
| B4A  | -B3A  | -H3A  | 121.00    | H10A | -B10A | -H101 | 110(3)    |
| C8A  | -B3A  | -H3A  | 122.00    | B11A | -B10A | -H101 | 56.8(19)  |
| B2A  | -B3A  | -H3A  | 122.00    | B9A  | -B10A | -H101 | 78.0(19)  |
| Pt7A | -B3A  | -H3A  | 115.00    | B11A | -B10A | -H10A | 128(2)    |
| B9A  | -B4A  | -H4A  | 126.00    | B2A  | -B11A | -H101 | 116.9(15) |
| C8A  | -B4A  | -H4A  | 126.00    | B6A  | -B11A | -H101 | 96.6(15)  |
| B5A  | -B4A  | -H4A  | 121.00    | B10A | -B11A | -H101 | 38.9(15)  |

Table S6 - Bond Angles (Degrees) (continued)  
for [9-(OMe)-8,8-(PMe2Ph)2-NIDO-8,7-PtCB9H11] (2)

|      |       |       |           |      |      |       |          |
|------|-------|-------|-----------|------|------|-------|----------|
| O11A | -B11A | -H101 | 112.4(15) | B2B  | -B3B | -B4B  | 106.3(3) |
| Pt7A | -B11A | -H101 | 76.9(15)  | B1B  | -B3B | -B4B  | 60.7(2)  |
| B2B  | -B1B  | -B3B  | 60.3(2)   | B4B  | -B3B | -B8B  | 110.3(3) |
| B5B  | -B1B  | -B6B  | 60.3(2)   | B1B  | -B3B | -B2B  | 60.2(2)  |
| B4B  | -B1B  | -B6B  | 105.1(3)  | B1B  | -B4B | -B10B | 106.1(3) |
| B4B  | -B1B  | -B5B  | 58.9(2)   | B1B  | -B4B | -B3B  | 58.9(2)  |
| B2B  | -B1B  | -B4B  | 106.2(3)  | B1B  | -B4B | -B5B  | 59.0(2)  |
| B2B  | -B1B  | -B5B  | 112.2(3)  | B1B  | -B4B | -B9B  | 109.4(3) |
| B2B  | -B1B  | -B6B  | 63.5(2)   | B9B  | -B4B | -B10B | 67.1(2)  |
| B3B  | -B1B  | -B4B  | 60.4(2)   | B3B  | -B4B | -B10B | 111.5(3) |
| B3B  | -B1B  | -B5B  | 111.8(3)  | B3B  | -B4B | -B5B  | 110.5(3) |
| B3B  | -B1B  | -B6B  | 111.9(3)  | B3B  | -B4B | -B9B  | 60.6(2)  |
| Pt7B | -B2B  | -B3B  | 115.1(2)  | B5B  | -B4B | -B9B  | 118.6(3) |
| Pt7B | -B2B  | -B6B  | 66.40(17) | B5B  | -B4B | -B10B | 61.7(3)  |
| Pt7B | -B2B  | -B8B  | 68.26(18) | C11B | -B5B | -B6B  | 57.0(2)  |
| B1B  | -B2B  | -B3B  | 59.6(2)   | C11B | -B5B | -B4B  | 103.4(3) |
| B1B  | -B2B  | -B6B  | 58.0(2)   | B6B  | -B5B | -B10B | 101.1(3) |
| B1B  | -B2B  | -B8B  | 109.7(3)  | C11B | -B5B | -B10B | 54.3(2)  |
| B3B  | -B2B  | -B6B  | 106.9(3)  | B1B  | -B5B | -B4B  | 62.1(2)  |
| B3B  | -B2B  | -B8B  | 58.2(2)   | B1B  | -B5B | -B6B  | 60.5(2)  |
| Pt7B | -B2B  | -B1B  | 115.6(2)  | B1B  | -B5B | -B10B | 106.9(3) |
| B6B  | -B2B  | -B8B  | 116.2(3)  | B4B  | -B5B | -B6B  | 107.7(3) |
| B2B  | -B3B  | -B8B  | 61.7(2)   | B4B  | -B5B | -B10B | 59.6(3)  |
| B2B  | -B3B  | -B9B  | 107.7(3)  | C11B | -B5B | -B1B  | 105.2(3) |
| B4B  | -B3B  | -B9B  | 58.7(2)   | C11B | -B6B | -B5B  | 58.8(2)  |
| B8B  | -B3B  | -B9B  | 62.0(2)   | B1B  | -B6B | -B2B  | 58.5(2)  |
| B1B  | -B3B  | -B8B  | 113.2(3)  | B1B  | -B6B | -B5B  | 59.2(2)  |
| B1B  | -B3B  | -B9B  | 109.3(3)  | B2B  | -B6B | -B5B  | 107.3(3) |

Table S6 - Bond Angles (Degrees) (continued)  
for [9-(OMe)-8,8-(PMe2Ph)2-NIDO-8,7-PtCB9H11] (2)

|      |       |       |           |      |      |      |        |
|------|-------|-------|-----------|------|------|------|--------|
| Pt7B | -B6B  | -B2B  | 64.83(17) | B2B  | -B1B | -H1B | 120.00 |
| Pt7B | -B6B  | -B5B  | 116.0(2)  | B3B  | -B1B | -H1B | 119.00 |
| C11B | -B6B  | -B1B  | 105.6(3)  | B4B  | -B1B | -H1B | 125.00 |
| C11B | -B6B  | -B2B  | 108.9(3)  | B5B  | -B1B | -H1B | 120.00 |
| Pt7B | -B6B  | -C11B | 64.83(19) | B6B  | -B1B | -H1B | 121.00 |
| Pt7B | -B6B  | -B1B  | 114.7(2)  | Pt7B | -B2B | -H2B | 117(2) |
| O8B  | -B8B  | -B2B  | 127.4(3)  | B1B  | -B2B | -H2B | 119(2) |
| Pt7B | -B8B  | -O8B  | 111.7(2)  | B3B  | -B2B | -H2B | 119(2) |
| Pt7B | -B8B  | -B2B  | 64.97(17) | B6B  | -B2B | -H2B | 122(2) |
| Pt7B | -B8B  | -B3B  | 114.0(2)  | B8B  | -B2B | -H2B | 118(2) |
| Pt7B | -B8B  | -B9B  | 105.5(2)  | B1B  | -B3B | -H3B | 119.00 |
| O8B  | -B8B  | -B9B  | 124.3(3)  | B2B  | -B3B | -H3B | 123.00 |
| B2B  | -B8B  | -B3B  | 60.2(2)   | B4B  | -B3B | -H3B | 123.00 |
| O8B  | -B8B  | -B3B  | 129.7(3)  | B8B  | -B3B | -H3B | 118.00 |
| B3B  | -B8B  | -B9B  | 60.3(2)   | B9B  | -B3B | -H3B | 122.00 |
| B2B  | -B8B  | -B9B  | 105.3(3)  | B1B  | -B4B | -H4B | 125.00 |
| B4B  | -B9B  | -B10B | 56.5(3)   | B3B  | -B4B | -H4B | 121.00 |
| B4B  | -B9B  | -B8B  | 108.3(3)  | B5B  | -B4B | -H4B | 118.00 |
| B3B  | -B9B  | -B4B  | 60.7(2)   | B9B  | -B4B | -H4B | 116.00 |
| B3B  | -B9B  | -B8B  | 57.6(2)   | B10B | -B4B | -H4B | 119.00 |
| B8B  | -B9B  | -B10B | 108.4(3)  | C11B | -B5B | -H5B | 126.00 |
| B3B  | -B9B  | -B10B | 103.6(3)  | B1B  | -B5B | -H5B | 121.00 |
| C11B | -B10B | -B5B  | 58.9(2)   | B4B  | -B5B | -H5B | 121.00 |
| C11B | -B10B | -B9B  | 114.4(3)  | B6B  | -B5B | -H5B | 124.00 |
| C11B | -B10B | -B4B  | 106.3(3)  | B10B | -B5B | -H5B | 126.00 |
| B4B  | -B10B | -B9B  | 56.4(2)   | Pt7B | -B6B | -H6B | 113.00 |
| B5B  | -B10B | -B9B  | 107.0(3)  | C11B | -B6B | -H6B | 122.00 |

B4B -B10B -B5B 58.6(2) B1B -B6B -H6B 122.00

Table S6 - Bond Angles (Degrees) (continued)  
for [9-(OMe)-8,8-(PMe2Ph)2-NIDO-8,7-PtCB9H11] (2)

|      |      |      |           |      |       |       |           |
|------|------|------|-----------|------|-------|-------|-----------|
| B2B  | -B6B | -H6B | 122.00    | B4B  | -B9B  | -H89  | 125.8(16) |
| B5B  | -B6B | -H6B | 121.00    | B8B  | -B9B  | -H9B  | 127.3(18) |
| Pt7B | -B8B | -H89 | 79.6(13)  | B8B  | -B9B  | -H89  | 57.0(19)  |
| O8B  | -B8B | -H89 | 113.3(12) | B10B | -B9B  | -H9B  | 120.0(18) |
| B2B  | -B8B | -H89 | 117.0(12) | B10B | -B9B  | -H89  | 78.0(18)  |
| B3B  | -B8B | -H89 | 94.8(14)  | H9B  | -B9B  | -H89  | 113(2)    |
| B9B  | -B8B | -H89 | 37.0(14)  | C11B | -B10B | -H10B | 123(2)    |
| B3B  | -B9B | -H9B | 122.7(18) | B4B  | -B10B | -H10B | 125(2)    |
| B3B  | -B9B | -H89 | 110.9(17) | B5B  | -B10B | -H10B | 128(2)    |
| B4B  | -B9B | -H9B | 114.7(18) | B9B  | -B10B | -H10B | 114(2)    |

Table S7 - Torsion Angles (Degrees)  
for [9-(OMe)-8,8-(PMe2Ph)2-NIDO-8,7-PtCB9H11] (2)

|      |       |       |       |             |
|------|-------|-------|-------|-------------|
| P2   | -Pt7A | -P1   | -C11  | -172.10(15) |
| B2A  | -Pt7A | -P1   | -C11  | 4.80(18)    |
| B3A  | -Pt7A | -P1   | -C11  | -33.3(2)    |
| B11A | -Pt7A | -P1   | -C11  | 51.30(18)   |
| P2   | -Pt7A | -P1   | -C12  | 65.03(15)   |
| B2A  | -Pt7A | -P1   | -C12  | -118.08(18) |
| B3A  | -Pt7A | -P1   | -C12  | -156.22(19) |
| B11A | -Pt7A | -P1   | -C12  | -71.57(17)  |
| P2   | -Pt7A | -P1   | -C131 | -56.91(13)  |
| B2A  | -Pt7A | -P1   | -C131 | 119.98(17)  |
| B3A  | -Pt7A | -P1   | -C131 | 81.85(18)   |
| B11A | -Pt7A | -P1   | -C131 | 166.49(17)  |
| P2   | -Pt7A | -C8A  | -B9A  | -104.6(3)   |
| B2A  | -Pt7A | -C8A  | -B9A  | 77.0(3)     |
| B3A  | -Pt7A | -C8A  | -B9A  | 112.7(3)    |
| B11A | -Pt7A | -C8A  | -B9A  | 31.6(3)     |
| B3A  | -Pt7A | -B2A  | -B11A | -134.9(3)   |
| C8A  | -Pt7A | -B11A | -B10A | -25.8(3)    |
| P1   | -Pt7A | -P2   | -C21  | 90.22(15)   |
| C8A  | -Pt7A | -P2   | -C21  | -82.26(18)  |
| B3A  | -Pt7A | -P2   | -C21  | -53.53(19)  |
| B11A | -Pt7A | -P2   | -C21  | -173.4(2)   |
| P1   | -Pt7A | -P2   | -C22  | -151.85(15) |
| C8A  | -Pt7A | -P2   | -C22  | 35.67(18)   |
| B3A  | -Pt7A | -P2   | -C22  | 64.40(19)   |
| B11A | -Pt7A | -P2   | -C22  | -55.5(2)    |
| P1   | -Pt7A | -P2   | -C231 | -33.59(12)  |
| C8A  | -Pt7A | -P2   | -C231 | 153.92(16)  |

Table S7 - Torsion Angles (Degrees) (continued)  
for [9-(OMe)-8,8-(PMe<sub>2</sub>Ph)<sub>2</sub>-NIDO-8,7-PtCB<sub>9</sub>H<sub>11</sub>] (2)

|      |       |       |       |             |
|------|-------|-------|-------|-------------|
| B3A  | -Pt7A | -P2   | -C231 | -177.34(16) |
| B11A | -Pt7A | -P2   | -C231 | 62.76(19)   |
| B11A | -Pt7A | -B3A  | -C8A  | 98.4(2)     |
| P1   | -Pt7A | -B3A  | -B1A  | 88.0(3)     |
| P1   | -Pt7A | -B11A | -O11A | 24.9(2)     |
| P2   | -Pt7A | -B11A | -O11A | -73.9(3)    |
| P1   | -Pt7A | -B2A  | -B1A  | -173.0(3)   |
| C8A  | -Pt7A | -B2A  | -B1A  | -0.4(3)     |
| P2   | -Pt7A | -C8A  | -B3A  | 142.74(19)  |
| B2A  | -Pt7A | -C8A  | -B3A  | -35.7(2)    |
| B11A | -Pt7A | -C8A  | -B3A  | -81.1(2)    |
| P2   | -Pt7A | -C8A  | -B4A  | -179.5(4)   |
| B2A  | -Pt7A | -C8A  | -B4A  | 2.1(3)      |
| B3A  | -Pt7A | -C8A  | -B4A  | 37.8(3)     |
| B11A | -Pt7A | -C8A  | -B4A  | -43.3(4)    |
| P2   | -Pt7A | -B11A | -B6A  | 126.7(2)    |
| C8A  | -Pt7A | -B11A | -B6A  | 37.7(3)     |
| B2A  | -Pt7A | -B11A | -B6A  | -36.9(2)    |
| B3A  | -Pt7A | -B11A | -B6A  | -4.9(3)     |
| P1   | -Pt7A | -B11A | -B10A | 162.0(2)    |
| P2   | -Pt7A | -B11A | -B10A | 63.3(3)     |
| B2A  | -Pt7A | -B11A | -B10A | -100.4(3)   |
| B3A  | -Pt7A | -B11A | -B10A | -68.3(3)    |
| C8A  | -Pt7A | -B11A | -O11A | -162.9(3)   |
| B2A  | -Pt7A | -B11A | -O11A | 122.5(3)    |
| B3A  | -Pt7A | -B11A | -O11A | 154.5(3)    |
| P1   | -Pt7A | -B11A | -B2A  | -97.61(17)  |

P2 -Pt7A -B11A -B2A 163.61(15)

- 26 -

Table S7 - Torsion Angles (Degrees) (continued)  
for [9-(OMe)-8,8-(PMe2Ph)2-NIDO-8,7-PtCB9H11] (2)

|      |       |       |       |             |
|------|-------|-------|-------|-------------|
| C8A  | -Pt7A | -B11A | -B2A  | 74.6(2)     |
| B3A  | -Pt7A | -B11A | -B2A  | 32.01(19)   |
| P1   | -Pt7A | -B11A | -B6A  | -134.5(2)   |
| P1   | -Pt7A | -B3A  | -C8A  | -175.03(16) |
| P2   | -Pt7A | -B3A  | -C8A  | -44.7(2)    |
| B2A  | -Pt7A | -B3A  | -C8A  | 129.6(3)    |
| B3A  | -Pt7A | -B2A  | -B6A  | -98.8(3)    |
| B11A | -Pt7A | -B2A  | -B6A  | 36.1(2)     |
| P1   | -Pt7A | -B2A  | -B11A | 84.75(17)   |
| P2   | -Pt7A | -B3A  | -B1A  | -141.7(2)   |
| P1   | -Pt7A | -B2A  | -B3A  | -140.34(16) |
| B11A | -Pt7A | -B2A  | -B3A  | 134.9(3)    |
| C8A  | -Pt7A | -B3A  | -B1A  | -97.0(3)    |
| B2A  | -Pt7A | -B3A  | -B1A  | 32.6(2)     |
| B11A | -Pt7A | -B3A  | -B1A  | 1.4(3)      |
| B3A  | -Pt7A | -B2A  | -B1A  | -32.7(3)    |
| B11A | -Pt7A | -B2A  | -B1A  | 102.3(3)    |
| C8A  | -Pt7A | -B2A  | -B11A | -102.7(2)   |
| P1   | -Pt7A | -B3A  | -B2A  | 55.4(2)     |
| P1   | -Pt7A | -B2A  | -B6A  | 120.8(2)    |
| C8A  | -Pt7A | -B2A  | -B6A  | -66.6(3)    |
| P2   | -Pt7A | -B3A  | -B4A  | -75.6(3)    |
| C8A  | -Pt7A | -B3A  | -B4A  | -30.9(3)    |
| B2A  | -Pt7A | -B3A  | -B4A  | 98.7(3)     |
| B11A | -Pt7A | -B3A  | -B2A  | -31.15(19)  |
| B11A | -Pt7A | -B3A  | -B4A  | 67.5(3)     |
| C8A  | -Pt7A | -B2A  | -B3A  | 32.26(19)   |



|    |       |      |      |          |
|----|-------|------|------|----------|
| P1 | -Pt7A | -B3A | -B4A | 154.1(2) |
|----|-------|------|------|----------|

- 27 -

Table S7 - Torsion Angles (Degrees) (continued)  
for [9-(OMe)-8,8-(PMe2Ph)2-NIDO-8,7-PtCB9H11] (2)

|      |       |      |       |             |
|------|-------|------|-------|-------------|
| C8A  | -Pt7A | -B3A | -B2A  | -129.6(3)   |
| P2   | -Pt7A | -B3A | -B2A  | -174.22(15) |
| B6B  | -Pt7B | -P4  | -C42  | 41.20(19)   |
| B8B  | -Pt7B | -P4  | -C42  | 159.7(2)    |
| P3   | -Pt7B | -P4  | -C431 | 21.35(12)   |
| C11B | -Pt7B | -P4  | -C431 | -166.40(16) |
| B6B  | -Pt7B | -P4  | -C431 | 163.82(16)  |
| P3   | -Pt7B | -B6B | -C11B | 175.21(15)  |
| B8B  | -Pt7B | -P4  | -C431 | -77.70(19)  |
| P3   | -Pt7B | -P4  | -C42  | -101.27(14) |
| C11B | -Pt7B | -P4  | -C42  | 70.98(18)   |
| P4   | -Pt7B | -B8B | -B3B  | -127.0(2)   |
| C11B | -Pt7B | -B8B | -B3B  | -40.0(3)    |
| B2B  | -Pt7B | -B8B | -B3B  | 36.0(2)     |
| B6B  | -Pt7B | -B2B | -B1B  | 31.7(2)     |
| P3   | -Pt7B | -B2B | -B6B  | 139.15(16)  |
| B6B  | -Pt7B | -P4  | -C41  | -74.97(19)  |
| P3   | -Pt7B | -B2B | -B3B  | -122.5(2)   |
| B8B  | -Pt7B | -P4  | -C41  | 43.5(2)     |
| P3   | -Pt7B | -B8B | -B3B  | 132.0(2)    |
| B6B  | -Pt7B | -B8B | -B2B  | -32.9(2)    |
| B8B  | -Pt7B | -B2B | -B3B  | -35.5(2)    |
| C11B | -Pt7B | -B2B | -B1B  | -1.6(3)     |
| P4   | -Pt7B | -B6B | -C11B | 46.3(2)     |
| B8B  | -Pt7B | -B2B | -B1B  | -102.2(3)   |
| P3   | -Pt7B | -B8B | -B2B  | 95.96(17)   |

|      |       |      |      |            |
|------|-------|------|------|------------|
| P4   | -Pt7B | -P3  | -C32 | -62.68(14) |
| C11B | -Pt7B | -B2B | -B3B | 65.1(3)    |

- 28 -

Table S7 - Torsion Angles (Degrees) (continued)  
for [9-(OMe)-8,8-(PMe2Ph)2-NIDO-8,7-PtCB9H11] (2)

|      |       |       |       |             |
|------|-------|-------|-------|-------------|
| B6B  | -Pt7B | -B2B  | -B3B  | 98.3(3)     |
| C11B | -Pt7B | -B8B  | -B2B  | -76.0(2)    |
| B6B  | -Pt7B | -C11B | -B5B  | -36.0(3)    |
| B6B  | -Pt7B | -B8B  | -B3B  | 3.1(3)      |
| B2B  | -Pt7B | -B6B  | -C11B | -128.0(3)   |
| B2B  | -Pt7B | -B8B  | -B9B  | 99.9(3)     |
| B6B  | -Pt7B | -B8B  | -B9B  | 67.0(2)     |
| B6B  | -Pt7B | -B2B  | -B8B  | 133.9(3)    |
| B8B  | -Pt7B | -C11B | -B10B | -29.5(3)    |
| P3   | -Pt7B | -B2B  | -B1B  | 170.8(2)    |
| B8B  | -Pt7B | -P3   | -C31  | -48.24(18)  |
| C11B | -Pt7B | -P4   | -C41  | -45.19(18)  |
| B2B  | -Pt7B | -P3   | -C31  | -1.54(18)   |
| B6B  | -Pt7B | -B8B  | -O8B  | -155.3(3)   |
| P4   | -Pt7B | -B8B  | -B2B  | -162.98(15) |
| P3   | -Pt7B | -P4   | -C41  | 142.56(15)  |
| B2B  | -Pt7B | -C11B | -B5B  | 0.9(3)      |
| B2B  | -Pt7B | -B6B  | -B1B  | -31.6(2)    |
| B8B  | -Pt7B | -C11B | -B5B  | 46.7(3)     |
| P3   | -Pt7B | -B8B  | -B9B  | -164.1(2)   |
| P4   | -Pt7B | -B8B  | -B9B  | -63.0(3)    |
| C11B | -Pt7B | -B8B  | -B9B  | 24.0(2)     |
| B8B  | -Pt7B | -B2B  | -B6B  | -133.9(3)   |
| P3   | -Pt7B | -B2B  | -B8B  | -86.98(17)  |
| B2B  | -Pt7B | -C11B | -B10B | -75.2(3)    |
| B6B  | -Pt7B | -P3   | -C31  | 37.7(2)     |

|     |       |      |      |            |
|-----|-------|------|------|------------|
| P4  | -Pt7B | -P3  | -C31 | 174.83(15) |
| B2B | -Pt7B | -B8B | -O8B | -122.4(3)  |

- 29 -

Table S7 - Torsion Angles (Degrees) (continued)  
for [9-(OMe)-8,8-(PMe2Ph)2-NIDO-8,7-PtCB9H11] (2)

|      |       |       |       |             |
|------|-------|-------|-------|-------------|
| P4   | -Pt7B | -B6B  | -B1B  | 142.7(2)    |
| C11B | -Pt7B | -B6B  | -B1B  | 96.4(3)     |
| P4   | -Pt7B | -C11B | -B5B  | -177.1(3)   |
| B6B  | -Pt7B | -P3   | -C331 | -77.83(17)  |
| B6B  | -Pt7B | -C11B | -B10B | -112.1(3)   |
| B8B  | -Pt7B | -B6B  | -B1B  | 0.2(3)      |
| P3   | -Pt7B | -B6B  | -B2B  | -56.8(2)    |
| P4   | -Pt7B | -C11B | -B6B  | -141.07(18) |
| C11B | -Pt7B | -B2B  | -B6B  | -33.25(19)  |
| P4   | -Pt7B | -B6B  | -B2B  | 174.25(15)  |
| B2B  | -Pt7B | -C11B | -B6B  | 36.9(2)     |
| B8B  | -Pt7B | -P3   | -C331 | -163.73(15) |
| P3   | -Pt7B | -B6B  | -B5B  | -154.66(18) |
| B8B  | -Pt7B | -B6B  | -C11B | -96.2(2)    |
| P3   | -Pt7B | -B6B  | -B1B  | -88.4(3)    |
| P3   | -Pt7B | -B8B  | -O8B  | -26.4(2)    |
| P4   | -Pt7B | -B8B  | -O8B  | 74.7(3)     |
| C11B | -Pt7B | -B8B  | -O8B  | 161.7(3)    |
| P4   | -Pt7B | -P3   | -C331 | 59.34(11)   |
| B8B  | -Pt7B | -C11B | -B6B  | 82.7(2)     |
| C11B | -Pt7B | -B2B  | -B8B  | 100.6(2)    |
| P4   | -Pt7B | -B6B  | -B5B  | 76.4(2)     |
| C11B | -Pt7B | -B6B  | -B5B  | 30.1(2)     |
| B2B  | -Pt7B | -B6B  | -B5B  | -97.9(3)    |
| B8B  | -Pt7B | -B6B  | -B5B  | -66.1(2)    |

|     |       |     |       |             |
|-----|-------|-----|-------|-------------|
| B6B | -Pt7B | -P3 | -C32  | 160.16(18)  |
| B2B | -Pt7B | -P3 | -C331 | -117.03(15) |
| B2B | -Pt7B | -P3 | -C32  | 120.96(17)  |

- 30 -

Table S7 - Torsion Angles (Degrees) (continued)  
for [9-(OMe)-8,8-(PMe2Ph)2-NIDO-8,7-PtCB9H11] (2)

|      |       |       |       |           |
|------|-------|-------|-------|-----------|
| B8B  | -Pt7B | -P3   | -C32  | 74.26(17) |
| P4   | -Pt7B | -C11B | -B10B | 106.8(3)  |
| B8B  | -Pt7B | -B6B  | -B2B  | 31.78(19) |
| C11B | -Pt7B | -B6B  | -B2B  | 128.0(3)  |
| C11  | -P1   | -C131 | -C132 | -98.4(3)  |
| C11  | -P1   | -C131 | -C136 | 81.0(3)   |
| Pt7A | -P1   | -C131 | -C132 | 137.2(3)  |
| C12  | -P1   | -C131 | -C136 | -172.7(3) |
| C12  | -P1   | -C131 | -C132 | 8.0(4)    |
| Pt7A | -P1   | -C131 | -C136 | -43.5(3)  |
| C22  | -P2   | -C231 | -C232 | 51.5(3)   |
| C21  | -P2   | -C231 | -C236 | -25.6(3)  |
| Pt7A | -P2   | -C231 | -C236 | 102.1(3)  |
| C22  | -P2   | -C231 | -C236 | -133.3(3) |
| Pt7A | -P2   | -C231 | -C232 | -73.1(3)  |
| C21  | -P2   | -C231 | -C232 | 159.2(3)  |
| C32  | -P3   | -C331 | -C336 | -16.9(3)  |
| Pt7B | -P3   | -C331 | -C336 | -145.8(3) |
| C32  | -P3   | -C331 | -C332 | 164.1(3)  |
| Pt7B | -P3   | -C331 | -C332 | 35.2(3)   |
| C31  | -P3   | -C331 | -C332 | -89.6(3)  |
| C31  | -P3   | -C331 | -C336 | 89.4(3)   |
| C42  | -P4   | -C431 | -C432 | 32.5(3)   |
| Pt7B | -P4   | -C431 | -C436 | 83.6(3)   |
| C41  | -P4   | -C431 | -C432 | 140.9(3)  |

|      |     |       |       |           |
|------|-----|-------|-------|-----------|
| C41  | -P4 | -C431 | -C436 | -42.0(3)  |
| C42  | -P4 | -C431 | -C436 | -150.4(3) |
| Pt7B | -P4 | -C431 | -C432 | -93.5(3)  |

- 31 -

Table S7 - Torsion Angles (Degrees) (continued)  
for [9-(OMe)-8,8-(PMe2Ph)2-NIDO-8,7-PtCB9H11] (2)

|      |       |       |       |           |
|------|-------|-------|-------|-----------|
| C11A | -O11A | -B11A | -B2A  | -161.5(4) |
| C11A | -O11A | -B11A | -B6A  | -81.5(5)  |
| C11A | -O11A | -B11A | -Pt7A | 123.3(3)  |
| C11A | -O11A | -B11A | -B10A | -3.9(5)   |
| C8B  | -O8B  | -B8B  | -Pt7B | -120.7(3) |
| C8B  | -O8B  | -B8B  | -B3B  | 85.2(5)   |
| C8B  | -O8B  | -B8B  | -B2B  | 164.9(4)  |
| C8B  | -O8B  | -B8B  | -B9B  | 7.5(5)    |
| B4A  | -C8A  | -B3A  | -Pt7A | -146.7(3) |
| Pt7A | -C8A  | -B9A  | -B4A  | -122.6(3) |
| Pt7A | -C8A  | -B9A  | -B5A  | -88.2(3)  |
| B4A  | -C8A  | -B3A  | -B1A  | -37.6(3)  |
| B9A  | -C8A  | -B3A  | -Pt7A | -102.4(3) |
| B9A  | -C8A  | -B3A  | -B2A  | -55.0(4)  |
| Pt7A | -C8A  | -B3A  | -B4A  | 146.7(3)  |
| B3A  | -C8A  | -B4A  | -B1A  | 37.7(3)   |
| B9A  | -C8A  | -B4A  | -B5A  | -34.4(3)  |
| Pt7A | -C8A  | -B4A  | -B1A  | -3.0(5)   |
| Pt7A | -C8A  | -B4A  | -B3A  | -40.7(3)  |
| Pt7A | -C8A  | -B4A  | -B5A  | 62.1(4)   |
| Pt7A | -C8A  | -B4A  | -B9A  | 96.5(4)   |
| B4A  | -C8A  | -B3A  | -B2A  | -99.3(3)  |
| Pt7A | -C8A  | -B3A  | -B1A  | 109.2(3)  |
| B3A  | -C8A  | -B9A  | -B4A  | -42.9(3)  |

|     |      |      |      |          |
|-----|------|------|------|----------|
| B3A | -C8A | -B9A | -B5A | -8.5(5)  |
| B9A | -C8A | -B3A | -B4A | 44.4(4)  |
| B9A | -C8A | -B3A | -B1A | 6.8(4)   |
| B3A | -C8A | -B4A | -B9A | 137.2(3) |

Table S7 - Torsion Angles (Degrees) (continued)  
for [9-(OMe)-8,8-(PMe2Ph)2-NIDO-8,7-PtCB9H11] (2)

|      |       |       |       |           |
|------|-------|-------|-------|-----------|
| B3A  | -C8A  | -B9A  | -B10A | 51.5(5)   |
| B4A  | -C8A  | -B9A  | -B5A  | 34.4(3)   |
| Pt7A | -C8A  | -B3A  | -B2A  | 47.4(2)   |
| B9A  | -C8A  | -B4A  | -B3A  | -137.2(3) |
| B3A  | -C8A  | -B4A  | -B5A  | 102.8(3)  |
| B4A  | -C8A  | -B9A  | -B10A | 94.4(4)   |
| Pt7A | -C8A  | -B9A  | -B10A | -28.2(4)  |
| B9A  | -C8A  | -B4A  | -B1A  | -99.5(4)  |
| B5B  | -C11B | -B6B  | -B1B  | 37.8(3)   |
| B5B  | -C11B | -B10B | -B9B  | -95.8(3)  |
| Pt7B | -C11B | -B5B  | -B10B | -100.0(4) |
| Pt7B | -C11B | -B10B | -B9B  | 25.7(4)   |
| Pt7B | -C11B | -B6B  | -B1B  | -110.4(2) |
| B10B | -C11B | -B6B  | -B1B  | -5.2(4)   |
| B10B | -C11B | -B6B  | -B2B  | 56.3(4)   |
| B5B  | -C11B | -B6B  | -B2B  | 99.3(3)   |
| Pt7B | -C11B | -B6B  | -B2B  | -48.9(2)  |
| Pt7B | -C11B | -B6B  | -B5B  | -148.2(2) |
| Pt7B | -C11B | -B5B  | -B1B  | 0.1(4)    |
| Pt7B | -C11B | -B5B  | -B4B  | -64.3(4)  |
| Pt7B | -C11B | -B10B | -B5B  | 121.5(3)  |
| B5B  | -C11B | -B10B | -B4B  | -35.9(3)  |
| B6B  | -C11B | -B5B  | -B10B | -138.4(3) |
| B6B  | -C11B | -B10B | -B4B  | 6.0(4)    |
| B6B  | -C11B | -B5B  | -B1B  | -38.3(3)  |
| Pt7B | -C11B | -B5B  | -B6B  | 38.4(3)   |
| B10B | -C11B | -B5B  | -B6B  | 138.4(3)  |
| B10B | -C11B | -B6B  | -Pt7B | 105.2(3)  |

Table S7 - Torsion Angles (Degrees) (continued)  
for [9-(OMe)-8,8-(PMe2Ph)2-NIDO-8,7-PtCB9H11] (2)

|      |       |       |       |           |
|------|-------|-------|-------|-----------|
| B10B | -C11B | -B5B  | -B4B  | 35.8(3)   |
| B6B  | -C11B | -B5B  | -B4B  | -102.6(3) |
| B6B  | -C11B | -B10B | -B9B  | -54.0(4)  |
| B10B | -C11B | -B6B  | -B5B  | -43.0(3)  |
| Pt7B | -C11B | -B10B | -B4B  | 85.6(3)   |
| B5B  | -C11B | -B6B  | -Pt7B | 148.2(2)  |
| B6B  | -C11B | -B10B | -B5B  | 41.9(3)   |
| B10B | -C11B | -B5B  | -B1B  | 100.1(3)  |
| P1   | -C131 | -C136 | -H136 | 0.00      |
| P2   | -C231 | -C236 | -C235 | -172.3(3) |
| C132 | -C131 | -C136 | -H136 | 180.00    |
| C136 | -C131 | -C132 | -H132 | -179.00   |
| P2   | -C231 | -C232 | -C233 | 174.3(3)  |
| P1   | -C131 | -C132 | -H132 | 0.00      |
| C232 | -C231 | -C236 | -C235 | 2.8(5)    |
| C236 | -C231 | -C232 | -C233 | -1.1(5)   |
| H132 | -C132 | -C133 | -H133 | -1.00     |
| H132 | -C132 | -C133 | -C134 | 179.00    |
| C231 | -C232 | -C233 | -C234 | -1.7(5)   |
| C131 | -C132 | -C133 | -H133 | 179.00    |
| C232 | -C233 | -C234 | -C235 | 2.7(6)    |
| H133 | -C133 | -C134 | -H134 | 0.00      |
| C132 | -C133 | -C134 | -H134 | 180.00    |
| H133 | -C133 | -C134 | -C135 | -180.00   |
| H134 | -C134 | -C135 | -H135 | 1.00      |
| C133 | -C134 | -C135 | -H135 | -179.00   |
| H134 | -C134 | -C135 | -C136 | -179.00   |
| C233 | -C234 | -C235 | -C236 | -1.0(6)   |



Table S7 - Torsion Angles (Degrees) (continued)  
for [9-(OMe)-8,8-(PMe2Ph)2-NIDO-8,7-PtCB9H11] (2)

|      |       |       |       |           |
|------|-------|-------|-------|-----------|
| H135 | -C135 | -C136 | -C131 | 179.00    |
| C134 | -C135 | -C136 | -H136 | 179.00    |
| C234 | -C235 | -C236 | -C231 | -1.7(5)   |
| H135 | -C135 | -C136 | -H136 | -1.00     |
| C336 | -C331 | -C332 | -H332 | -178.00   |
| C332 | -C331 | -C336 | -H336 | 178.00    |
| P4   | -C431 | -C436 | -C435 | -177.1(3) |
| C436 | -C431 | -C432 | -C433 | -0.3(5)   |
| P3   | -C331 | -C332 | -H332 | 1.00      |
| P3   | -C331 | -C336 | -H336 | -1.00     |
| C432 | -C431 | -C436 | -C435 | 0.2(6)    |
| P4   | -C431 | -C432 | -C433 | 176.8(3)  |
| C431 | -C432 | -C433 | -C434 | 0.9(6)    |
| H332 | -C332 | -C333 | -C334 | 180.00    |
| H332 | -C332 | -C333 | -H333 | 0.00      |
| C331 | -C332 | -C333 | -H333 | 180.00    |
| H333 | -C333 | -C334 | -C335 | 179.00    |
| C332 | -C333 | -C334 | -H334 | 179.00    |
| H333 | -C333 | -C334 | -H334 | -1.00     |
| C432 | -C433 | -C434 | -C435 | -1.4(7)   |
| C333 | -C334 | -C335 | -H335 | 180.00    |
| H334 | -C334 | -C335 | -H335 | 0.00      |
| H334 | -C334 | -C335 | -C336 | -180.00   |
| C433 | -C434 | -C435 | -C436 | 1.2(8)    |
| H335 | -C335 | -C336 | -C331 | -178.00   |
| C334 | -C335 | -C336 | -H336 | -178.00   |
| C434 | -C435 | -C436 | -C431 | -0.6(7)   |
| H335 | -C335 | -C336 | -H336 | 2.00      |

Table S7 - Torsion Angles (Degrees) (continued)  
for [9-(OMe)-8,8-(PMe2Ph)2-NIDO-8,7-PtCB9H11] (2)

|     |      |      |       |           |
|-----|------|------|-------|-----------|
| B5A | -B1A | -B4A | -B9A  | 41.3(3)   |
| B3A | -B1A | -B4A | -C8A  | -36.3(3)  |
| B3A | -B1A | -B4A | -B5A  | -134.2(3) |
| B5A | -B1A | -B4A | -B3A  | 134.2(3)  |
| B2A | -B1A | -B4A | -B5A  | -95.6(4)  |
| B3A | -B1A | -B6A | -B11A | -6.2(4)   |
| B2A | -B1A | -B4A | -B9A  | -54.3(4)  |
| B3A | -B1A | -B4A | -B9A  | -92.9(3)  |
| B5A | -B1A | -B4A | -C8A  | 97.9(4)   |
| B3A | -B1A | -B6A | -B5A  | 94.5(3)   |
| B6A | -B1A | -B3A | -B2A  | 37.0(3)   |
| B6A | -B1A | -B3A | -C8A  | -65.7(4)  |
| B6A | -B1A | -B3A | -B4A  | -102.8(4) |
| B2A | -B1A | -B4A | -C8A  | 2.2(5)    |
| B3A | -B1A | -B6A | -B10A | 61.0(4)   |
| B4A | -B1A | -B6A | -B2A  | -103.6(3) |
| B2A | -B1A | -B4A | -B3A  | 38.6(3)   |
| B6A | -B1A | -B5A | -B4A  | 147.7(3)  |
| B5A | -B1A | -B6A | -B11A | -100.8(3) |
| B6A | -B1A | -B4A | -C8A  | 67.9(4)   |
| B6A | -B1A | -B4A | -B3A  | 104.2(3)  |
| B3A | -B1A | -B6A | -B2A  | -38.3(3)  |
| B2A | -B1A | -B6A | -B5A  | 132.8(3)  |
| B4A | -B1A | -B6A | -B5A  | 29.2(3)   |
| B3A | -B1A | -B5A | -B10A | -73.9(4)  |
| B5A | -B1A | -B6A | -B2A  | -132.8(3) |
| B5A | -B1A | -B6A | -B10A | -33.6(3)  |
| B2A | -B1A | -B6A | -B10A | 99.2(3)   |

Table S7 - Torsion Angles (Degrees) (continued)  
for [9-(OMe)-8,8-(PMe2Ph)2-NIDO-8,7-PtCB9H11] (2)

|     |      |      |       |           |
|-----|------|------|-------|-----------|
| B2A | -B1A | -B6A | -B11A | 32.0(3)   |
| B3A | -B1A | -B5A | -B4A  | 39.9(3)   |
| B3A | -B1A | -B5A | -B9A  | -2.6(4)   |
| B6A | -B1A | -B3A | -Pt7A | 2.3(4)    |
| B4A | -B1A | -B2A | -B11A | 73.7(4)   |
| B4A | -B1A | -B5A | -B10A | -113.8(4) |
| B4A | -B1A | -B3A | -B2A  | 139.8(3)  |
| B3A | -B1A | -B2A | -Pt7A | 36.0(3)   |
| B4A | -B1A | -B6A | -B10A | -4.3(4)   |
| B3A | -B1A | -B5A | -B6A  | -107.8(3) |
| B2A | -B1A | -B5A | -B10A | -7.7(4)   |
| B4A | -B1A | -B6A | -B11A | -71.5(4)  |
| B4A | -B1A | -B2A | -B6A  | 103.2(4)  |
| B2A | -B1A | -B3A | -B4A  | -139.8(3) |
| B5A | -B1A | -B3A | -Pt7A | 66.0(3)   |
| B5A | -B1A | -B3A | -C8A  | -2.0(4)   |
| B5A | -B1A | -B3A | -B2A  | 100.7(3)  |
| B5A | -B1A | -B3A | -B4A  | -39.0(3)  |
| B6A | -B1A | -B5A | -B10A | 33.9(3)   |
| B4A | -B1A | -B5A | -B9A  | -42.6(3)  |
| B6A | -B1A | -B2A | -B11A | -29.6(3)  |
| B4A | -B1A | -B3A | -Pt7A | 105.1(3)  |
| B5A | -B1A | -B2A | -Pt7A | -62.6(3)  |
| B5A | -B1A | -B2A | -B3A  | -98.7(3)  |
| B6A | -B1A | -B4A | -B5A  | -30.0(3)  |
| B6A | -B1A | -B4A | -B9A  | 11.3(4)   |
| B4A | -B1A | -B2A | -B3A  | -37.1(3)  |
| B4A | -B1A | -B5A | -B6A  | -147.7(3) |

Table S7 - Torsion Angles (Degrees) (continued)  
for [9-(OMe)-8,8-(PMe2Ph)2-NIDO-8,7-PtCB9H11] (2)

|      |      |       |       |           |
|------|------|-------|-------|-----------|
| B6A  | -B1A | -B2A  | -B3A  | -140.3(3) |
| B4A  | -B1A | -B3A  | -C8A  | 37.1(3)   |
| B2A  | -B1A | -B5A  | -B4A  | 106.2(3)  |
| B2A  | -B1A | -B5A  | -B6A  | -41.6(3)  |
| B2A  | -B1A | -B5A  | -B9A  | 63.6(4)   |
| B3A  | -B1A | -B2A  | -B6A  | 140.3(3)  |
| B4A  | -B1A | -B2A  | -Pt7A | -1.0(5)   |
| B5A  | -B1A | -B2A  | -B6A  | 41.6(3)   |
| B2A  | -B1A | -B3A  | -Pt7A | -34.7(2)  |
| B2A  | -B1A | -B3A  | -C8A  | -102.7(3) |
| B6A  | -B1A | -B2A  | -Pt7A | -104.3(3) |
| B3A  | -B1A | -B2A  | -B11A | 110.7(3)  |
| B6A  | -B1A | -B5A  | -B9A  | 105.2(3)  |
| B5A  | -B1A | -B2A  | -B11A | 12.1(4)   |
| B6A  | -B2A | -B11A | -O11A | 119.0(4)  |
| B6A  | -B2A | -B11A | -B10A | -41.9(3)  |
| B11A | -B2A | -B3A  | -B1A  | -96.9(3)  |
| B1A  | -B2A | -B11A | -O11A | 149.2(3)  |
| B3A  | -B2A | -B6A  | -B11A | -112.3(3) |
| B11A | -B2A | -B3A  | -Pt7A | 47.9(2)   |
| B6A  | -B2A | -B3A  | -B4A  | 0.7(4)    |
| B3A  | -B2A | -B11A | -B10A | 51.3(4)   |
| B3A  | -B2A | -B6A  | -B5A  | -7.6(4)   |
| B11A | -B2A | -B3A  | -C8A  | 0.9(4)    |
| Pt7A | -B2A | -B6A  | -B10A | 3.0(4)    |
| B6A  | -B2A | -B11A | -Pt7A | -140.6(2) |
| B1A  | -B2A | -B11A | -B6A  | 30.1(3)   |
| B6A  | -B2A | -B3A  | -B1A  | -35.1(3)  |

Table S7 - Torsion Angles (Degrees) (continued)  
for [9-(OMe)-8,8-(PMe2Ph)2-NIDO-8,7-PtCB9H11] (2)

|      |      |       |       |           |
|------|------|-------|-------|-----------|
| B3A  | -B2A | -B11A | -B6A  | 93.2(3)   |
| B3A  | -B2A | -B11A | -O11A | -147.8(3) |
| B1A  | -B2A | -B6A  | -B11A | -146.7(3) |
| B3A  | -B2A | -B11A | -Pt7A | -47.4(2)  |
| B1A  | -B2A | -B11A | -Pt7A | -110.4(2) |
| B3A  | -B2A | -B6A  | -B10A | -69.0(4)  |
| B6A  | -B2A | -B3A  | -C8A  | 62.8(4)   |
| B6A  | -B2A | -B3A  | -Pt7A | 109.8(3)  |
| B1A  | -B2A | -B3A  | -B4A  | 35.8(3)   |
| B3A  | -B2A | -B6A  | -B1A  | 34.3(3)   |
| Pt7A | -B2A | -B6A  | -B5A  | 64.4(4)   |
| Pt7A | -B2A | -B11A | -B6A  | 140.6(2)  |
| Pt7A | -B2A | -B11A | -B10A | 98.7(3)   |
| Pt7A | -B2A | -B3A  | -C8A  | -47.0(2)  |
| Pt7A | -B2A | -B3A  | -B1A  | -144.8(3) |
| B11A | -B2A | -B3A  | -B4A  | -61.2(4)  |
| Pt7A | -B2A | -B6A  | -B1A  | 106.4(3)  |
| B1A  | -B2A | -B3A  | -C8A  | 97.8(3)   |
| Pt7A | -B2A | -B11A | -O11A | -100.4(4) |
| B11A | -B2A | -B6A  | -B5A  | 104.8(3)  |
| B1A  | -B2A | -B3A  | -Pt7A | 144.8(3)  |
| B11A | -B2A | -B6A  | -B10A | 43.3(3)   |
| Pt7A | -B2A | -B3A  | -B4A  | -109.0(3) |
| B11A | -B2A | -B6A  | -B1A  | 146.7(3)  |
| Pt7A | -B2A | -B6A  | -B11A | -40.3(2)  |
| B1A  | -B2A | -B6A  | -B10A | -103.4(3) |
| B1A  | -B2A | -B11A | -B10A | -11.8(4)  |
| B1A  | -B2A | -B6A  | -B5A  | -41.9(3)  |

Table S7 - Torsion Angles (Degrees) (continued)  
for [9-(OMe)-8,8-(PMe2Ph)2-NIDO-8,7-PtCB9H11] (2)

|      |      |      |       |           |
|------|------|------|-------|-----------|
| B1A  | -B3A | -B4A | -C8A  | 137.3(4)  |
| Pt7A | -B3A | -B4A | -B1A  | -104.7(3) |
| Pt7A | -B3A | -B4A | -C8A  | 32.7(3)   |
| C8A  | -B3A | -B4A | -B9A  | -34.1(3)  |
| B1A  | -B3A | -B4A | -B9A  | 103.2(4)  |
| C8A  | -B3A | -B4A | -B5A  | -95.2(4)  |
| B2A  | -B3A | -B4A | -B5A  | 6.8(4)    |
| C8A  | -B3A | -B4A | -B1A  | -137.3(4) |
| B2A  | -B3A | -B4A | -B1A  | -35.3(3)  |
| B1A  | -B3A | -B4A | -B5A  | 42.1(3)   |
| B2A  | -B3A | -B4A | -C8A  | 102.0(3)  |
| Pt7A | -B3A | -B4A | -B5A  | -62.5(4)  |
| Pt7A | -B3A | -B4A | -B9A  | -1.4(4)   |
| B2A  | -B3A | -B4A | -B9A  | 67.9(4)   |
| C8A  | -B4A | -B5A | -B10A | -5.3(5)   |
| B3A  | -B4A | -B9A | -C8A  | 35.6(3)   |
| B1A  | -B4A | -B5A | -B10A | 95.4(4)   |
| B1A  | -B4A | -B5A | -B6A  | 29.0(3)   |
| B1A  | -B4A | -B9A | -B5A  | -43.0(3)  |
| B1A  | -B4A | -B9A | -B10A | -13.3(4)  |
| B3A  | -B4A | -B5A | -B10A | 54.5(5)   |
| C8A  | -B4A | -B5A | -B9A  | 32.1(3)   |
| C8A  | -B4A | -B5A | -B1A  | -100.6(3) |
| B9A  | -B4A | -B5A | -B1A  | -132.7(3) |
| C8A  | -B4A | -B9A | -B10A | -110.8(3) |
| B1A  | -B4A | -B5A | -B9A  | 132.7(3)  |
| B3A  | -B4A | -B5A | -B1A  | -40.9(3)  |
| B3A  | -B4A | -B5A | -B9A  | 91.8(3)   |

Table S7 - Torsion Angles (Degrees) (continued)  
for [9-(OMe)-8,8-(PMe2Ph)2-NIDO-8,7-PtCB9H11] (2)

|      |      |       |       |           |
|------|------|-------|-------|-----------|
| C8A  | -B4A | -B5A  | -B6A  | -71.7(4)  |
| B1A  | -B4A | -B9A  | -C8A  | 97.5(3)   |
| B5A  | -B4A | -B9A  | -B10A | 29.7(3)   |
| C8A  | -B4A | -B9A  | -B5A  | -140.5(3) |
| B3A  | -B4A | -B9A  | -B5A  | -104.9(3) |
| B3A  | -B4A | -B9A  | -B10A | -75.2(4)  |
| B3A  | -B4A | -B5A  | -B6A  | -11.9(5)  |
| B5A  | -B4A | -B9A  | -C8A  | 140.5(3)  |
| B9A  | -B4A | -B5A  | -B10A | -37.4(4)  |
| B9A  | -B4A | -B5A  | -B6A  | -103.8(3) |
| B10A | -B5A | -B6A  | -B11A | -35.6(4)  |
| B10A | -B5A | -B6A  | -B1A  | -142.5(3) |
| B9A  | -B5A | -B6A  | -B11A | 10.6(5)   |
| B10A | -B5A | -B6A  | -B2A  | -101.1(3) |
| B1A  | -B5A | -B10A | -B9A  | 100.0(4)  |
| B10A | -B5A | -B9A  | -C8A  | 110.7(4)  |
| B4A  | -B5A | -B10A | -B6A  | -97.7(4)  |
| B9A  | -B5A | -B6A  | -B2A  | -54.9(5)  |
| B4A  | -B5A | -B6A  | -B2A  | 12.2(4)   |
| B9A  | -B5A | -B6A  | -B10A | 46.2(4)   |
| B6A  | -B5A | -B9A  | -C8A  | 68.1(5)   |
| B4A  | -B5A | -B6A  | -B11A | 77.7(5)   |
| B1A  | -B5A | -B9A  | -B10A | -104.3(3) |
| B1A  | -B5A | -B10A | -B11A | 0.5(5)    |
| B6A  | -B5A | -B9A  | -B4A  | 102.6(4)  |
| B10A | -B5A | -B9A  | -B4A  | 145.2(3)  |
| B1A  | -B5A | -B10A | -B6A  | -33.2(3)  |
| B1A  | -B5A | -B9A  | -C8A  | 6.4(4)    |

Table S7 - Torsion Angles (Degrees) (continued)  
for [9-(OMe)-8,8-(PMe2Ph)2-NIDO-8,7-PtCB9H11] (2)

|      |      |       |       |           |
|------|------|-------|-------|-----------|
| B1A  | -B5A | -B9A  | -B4A  | 40.9(3)   |
| B4A  | -B5A | -B6A  | -B10A | 113.3(4)  |
| B6A  | -B5A | -B10A | -B9A  | 133.2(3)  |
| B9A  | -B5A | -B6A  | -B1A  | -96.3(4)  |
| B1A  | -B5A | -B6A  | -B11A | 106.9(4)  |
| B4A  | -B5A | -B6A  | -B1A  | -29.2(3)  |
| B6A  | -B5A | -B9A  | -B10A | -42.6(4)  |
| B4A  | -B5A | -B10A | -B9A  | 35.5(4)   |
| B4A  | -B5A | -B10A | -B11A | -64.0(5)  |
| B4A  | -B5A | -B9A  | -B10A | -145.2(3) |
| B6A  | -B5A | -B10A | -B11A | 33.7(3)   |
| B4A  | -B5A | -B9A  | -C8A  | -34.5(3)  |
| B1A  | -B5A | -B6A  | -B2A  | 41.4(3)   |
| B1A  | -B5A | -B6A  | -B10A | 142.5(3)  |
| B9A  | -B5A | -B10A | -B6A  | -133.2(3) |
| B9A  | -B5A | -B10A | -B11A | -99.5(4)  |
| B10A | -B6A | -B11A | -B2A  | -132.1(3) |
| B11A | -B6A | -B10A | -B9A  | 103.2(3)  |
| B5A  | -B6A | -B11A | -B10A | 34.3(3)   |
| B11A | -B6A | -B10A | -B5A  | 141.7(4)  |
| B5A  | -B6A | -B11A | -B2A  | -97.8(4)  |
| B5A  | -B6A | -B10A | -B9A  | -38.5(3)  |
| B2A  | -B6A | -B10A | -B9A  | 59.8(4)   |
| B5A  | -B6A | -B11A | -Pt7A | -59.0(4)  |
| B5A  | -B6A | -B10A | -B11A | -141.7(4) |
| B1A  | -B6A | -B11A | -B2A  | -31.4(3)  |
| B10A | -B6A | -B11A | -O11A | 111.5(5)  |
| B2A  | -B6A | -B10A | -B11A | -43.4(3)  |



Table S7 - Torsion Angles (Degrees) (continued)  
for [9-(OMe)-8,8-(PMe2Ph)2-NIDO-8,7-PtCB9H11] (2)

|      |       |       |       |           |
|------|-------|-------|-------|-----------|
| B2A  | -B6A  | -B10A | -B5A  | 98.3(4)   |
| B1A  | -B6A  | -B10A | -B11A | -107.2(3) |
| B1A  | -B6A  | -B11A | -Pt7A | 7.4(4)    |
| B1A  | -B6A  | -B11A | -O11A | -147.8(4) |
| B5A  | -B6A  | -B11A | -O11A | 145.8(4)  |
| B2A  | -B6A  | -B11A | -B10A | 132.1(3)  |
| B2A  | -B6A  | -B11A | -O11A | -116.4(4) |
| B10A | -B6A  | -B11A | -Pt7A | -93.3(3)  |
| B1A  | -B6A  | -B11A | -B10A | 100.7(3)  |
| B1A  | -B6A  | -B10A | -B9A  | -4.0(4)   |
| B1A  | -B6A  | -B10A | -B5A  | 34.5(3)   |
| B2A  | -B6A  | -B11A | -Pt7A | 38.8(2)   |
| B4A  | -B9A  | -B10A | -B11A | 70.6(4)   |
| B4A  | -B9A  | -B10A | -B6A  | 10.6(4)   |
| B4A  | -B9A  | -B10A | -B5A  | -30.5(3)  |
| C8A  | -B9A  | -B10A | -B11A | 8.1(5)    |
| B5A  | -B9A  | -B10A | -B6A  | 41.1(3)   |
| C8A  | -B9A  | -B10A | -B5A  | -93.1(4)  |
| C8A  | -B9A  | -B10A | -B6A  | -52.0(5)  |
| B5A  | -B9A  | -B10A | -B11A | 101.1(4)  |
| B9A  | -B10A | -B11A | -B2A  | -52.8(4)  |
| B6A  | -B10A | -B11A | -B2A  | 41.9(3)   |
| B9A  | -B10A | -B11A | -B6A  | -94.6(4)  |
| B5A  | -B10A | -B11A | -Pt7A | 74.1(4)   |
| B9A  | -B10A | -B11A | -O11A | 145.4(4)  |
| B5A  | -B10A | -B11A | -B6A  | -35.1(3)  |
| B9A  | -B10A | -B11A | -Pt7A | 14.6(4)   |
| B6A  | -B10A | -B11A | -O11A | -120.0(4) |

Table S7 - Torsion Angles (Degrees) (continued)  
for [9-(OMe)-8,8-(PMe<sub>2</sub>Ph)<sub>2</sub>-NIDO-8,7-PtCB9H11] (2)

|     |       |       |       |           |
|-----|-------|-------|-------|-----------|
| B6A | -B10A | -B11A | -Pt7A | 109.2(3)  |
| B5A | -B10A | -B11A | -B2A  | 6.8(4)    |
| B5A | -B10A | -B11A | -O11A | -155.1(4) |
| B5B | -B1B  | -B2B  | -B3B  | -103.2(3) |
| B6B | -B1B  | -B2B  | -Pt7B | -34.6(2)  |
| B4B | -B1B  | -B2B  | -B3B  | -40.8(3)  |
| B4B | -B1B  | -B2B  | -B6B  | 99.1(3)   |
| B6B | -B1B  | -B2B  | -B3B  | -139.9(3) |
| B6B | -B1B  | -B2B  | -B8B  | -109.2(3) |
| B5B | -B1B  | -B2B  | -B8B  | -72.6(3)  |
| B4B | -B1B  | -B3B  | -B8B  | 101.1(3)  |
| B4B | -B1B  | -B3B  | -B9B  | 34.1(3)   |
| B5B | -B1B  | -B3B  | -B2B  | 103.9(3)  |
| B5B | -B1B  | -B3B  | -B4B  | -30.0(3)  |
| B4B | -B1B  | -B2B  | -B8B  | -10.1(4)  |
| B5B | -B1B  | -B2B  | -B6B  | 36.7(3)   |
| B3B | -B1B  | -B2B  | -Pt7B | 105.3(3)  |
| B6B | -B1B  | -B5B  | -C11B | 36.7(3)   |
| B5B | -B1B  | -B3B  | -B9B  | 4.1(4)    |
| B6B | -B1B  | -B3B  | -B2B  | 38.5(3)   |
| B6B | -B1B  | -B3B  | -B4B  | -95.4(3)  |
| B5B | -B1B  | -B3B  | -B8B  | 71.2(4)   |
| B4B | -B1B  | -B5B  | -B6B  | -134.0(3) |
| B4B | -B1B  | -B5B  | -B10B | -40.7(3)  |
| B3B | -B1B  | -B6B  | -B2B  | -37.1(3)  |
| B3B | -B1B  | -B6B  | -B5B  | 103.4(3)  |
| B3B | -B1B  | -B2B  | -B6B  | 139.9(3)  |
| B3B | -B1B  | -B2B  | -B8B  | 30.7(2)   |

Table S7 - Torsion Angles (Degrees) (continued)  
for [9-(OMe)-8,8-(PMe2Ph)2-NIDO-8,7-PtCB9H11] (2)

|     |      |      |       |           |
|-----|------|------|-------|-----------|
| B4B | -B1B | -B2B | -Pt7B | 64.6(3)   |
| B4B | -B1B | -B6B | -B5B  | 39.6(3)   |
| B5B | -B1B | -B6B | -Pt7B | -106.7(3) |
| B5B | -B1B | -B6B | -C11B | -37.6(3)  |
| B5B | -B1B | -B6B | -B2B  | -140.5(3) |
| B5B | -B1B | -B2B | -Pt7B | 2.1(4)    |
| B6B | -B1B | -B4B | -B5B  | -40.3(3)  |
| B6B | -B1B | -B4B | -B9B  | 72.1(4)   |
| B6B | -B1B | -B4B | -B10B | 1.2(4)    |
| B2B | -B1B | -B3B | -B4B  | -133.9(3) |
| B2B | -B1B | -B3B | -B8B  | -32.8(3)  |
| B2B | -B1B | -B3B | -B9B  | -99.8(3)  |
| B4B | -B1B | -B3B | -B2B  | 133.9(3)  |
| B3B | -B1B | -B5B | -C11B | -66.9(4)  |
| B3B | -B1B | -B5B | -B4B  | 30.5(3)   |
| B3B | -B1B | -B5B | -B6B  | -103.6(3) |
| B3B | -B1B | -B5B | -B10B | -10.2(4)  |
| B4B | -B1B | -B5B | -C11B | -97.4(3)  |
| B5B | -B1B | -B4B | -B3B  | 147.2(3)  |
| B5B | -B1B | -B4B | -B9B  | 112.4(4)  |
| B5B | -B1B | -B4B | -B10B | 41.5(3)   |
| B6B | -B1B | -B5B | -B4B  | 134.0(3)  |
| B6B | -B1B | -B5B | -B10B | 93.4(3)   |
| B2B | -B1B | -B6B | -Pt7B | 33.8(2)   |
| B2B | -B1B | -B6B | -C11B | 102.8(3)  |
| B2B | -B1B | -B6B | -B5B  | 140.5(3)  |
| B3B | -B1B | -B6B | -Pt7B | -3.3(4)   |
| B6B | -B1B | -B3B | -B8B  | 5.7(4)    |

Table S7 - Torsion Angles (Degrees) (continued)  
for [9-(OMe)-8,8-(PMe2Ph)2-NIDO-8,7-PtCB9H11] (2)

|      |      |      |       |           |
|------|------|------|-------|-----------|
| B6B  | -B1B | -B3B | -B9B  | -61.4(4)  |
| B4B  | -B1B | -B6B | -Pt7B | -67.1(3)  |
| B4B  | -B1B | -B6B | -C11B | 2.0(4)    |
| B4B  | -B1B | -B6B | -B2B  | -100.8(3) |
| B3B  | -B1B | -B4B | -B10B | -105.7(3) |
| B2B  | -B1B | -B4B | -B9B  | 5.8(4)    |
| B2B  | -B1B | -B4B | -B10B | -65.1(3)  |
| B3B  | -B1B | -B4B | -B5B  | -147.2(3) |
| B6B  | -B1B | -B4B | -B3B  | 107.0(3)  |
| B2B  | -B1B | -B5B | -B6B  | -38.0(3)  |
| B2B  | -B1B | -B5B | -B10B | 55.4(4)   |
| B2B  | -B1B | -B4B | -B3B  | 40.7(3)   |
| B2B  | -B1B | -B4B | -B5B  | -106.6(3) |
| B3B  | -B1B | -B4B | -B9B  | -34.9(3)  |
| B2B  | -B1B | -B5B | -C11B | -1.3(4)   |
| B2B  | -B1B | -B5B | -B4B  | 96.0(3)   |
| B3B  | -B1B | -B6B | -C11B | 65.7(4)   |
| B3B  | -B2B | -B6B | -Pt7B | -110.6(2) |
| B1B  | -B2B | -B6B | -C11B | -97.2(3)  |
| B1B  | -B2B | -B6B | -B5B  | -35.0(3)  |
| B1B  | -B2B | -B6B | -Pt7B | -146.1(2) |
| Pt7B | -B2B | -B3B | -B4B  | -65.3(3)  |
| Pt7B | -B2B | -B3B | -B8B  | 39.4(2)   |
| Pt7B | -B2B | -B3B | -B1B  | -106.2(3) |
| B1B  | -B2B | -B8B | -Pt7B | 110.6(2)  |
| Pt7B | -B2B | -B3B | -B9B  | -3.6(3)   |
| B1B  | -B2B | -B3B | -B4B  | 40.9(3)   |

|     |      |      |      |          |
|-----|------|------|------|----------|
| B1B | -B2B | -B3B | -B8B | 145.6(3) |
|-----|------|------|------|----------|

- 46 -

Table S7 - Torsion Angles (Degrees) (continued)  
for [9-(OMe)-8,8-(PMe2Ph)2-NIDO-8,7-PtCB9H11] (2)

|      |      |      |       |           |
|------|------|------|-------|-----------|
| B1B  | -B2B | -B3B | -B9B  | 102.6(3)  |
| B6B  | -B2B | -B3B | -B1B  | -34.8(2)  |
| Pt7B | -B2B | -B6B | -B5B  | 111.1(2)  |
| B6B  | -B2B | -B8B | -B9B  | -52.8(3)  |
| B6B  | -B2B | -B8B | -B3B  | -94.3(3)  |
| B8B  | -B2B | -B6B | -C11B | 0.6(4)    |
| B8B  | -B2B | -B6B | -B1B  | 97.8(3)   |
| B8B  | -B2B | -B6B | -B5B  | 62.8(4)   |
| Pt7B | -B2B | -B8B | -O8B  | 99.0(3)   |
| Pt7B | -B2B | -B8B | -B3B  | -141.8(2) |
| Pt7B | -B2B | -B8B | -B9B  | -100.3(2) |
| Pt7B | -B2B | -B6B | -B1B  | 146.1(2)  |
| Pt7B | -B2B | -B6B | -C11B | 48.9(2)   |
| B1B  | -B2B | -B8B | -O8B  | -150.4(3) |
| B1B  | -B2B | -B8B | -B3B  | -31.2(3)  |
| B1B  | -B2B | -B8B | -B9B  | 10.3(3)   |
| B3B  | -B2B | -B8B | -Pt7B | 141.8(2)  |
| B3B  | -B2B | -B8B | -O8B  | -119.2(4) |
| B3B  | -B2B | -B6B | -C11B | -61.7(3)  |
| B3B  | -B2B | -B6B | -B1B  | 35.5(3)   |
| B3B  | -B2B | -B6B | -B5B  | 0.5(4)    |
| B8B  | -B2B | -B6B | -Pt7B | -48.3(2)  |
| B6B  | -B2B | -B8B | -O8B  | 146.4(3)  |
| B6B  | -B2B | -B3B | -B9B  | 67.8(3)   |
| B8B  | -B2B | -B3B | -B1B  | -145.6(3) |
| B8B  | -B2B | -B3B | -B4B  | -104.7(3) |
| B8B  | -B2B | -B3B | -B9B  | -43.0(3)  |

B6B

-B2B

-B3B

-B4B

6.1(4)

Table S7 - Torsion Angles (Degrees) (continued)  
for [9-(OMe)-8,8-(PMe2Ph)2-NIDO-8,7-PtCB9H11] (2)

|     |      |      |       |           |
|-----|------|------|-------|-----------|
| B6B | -B2B | -B3B | -B8B  | 110.8(3)  |
| B6B | -B2B | -B8B | -Pt7B | 47.4(2)   |
| B3B | -B2B | -B8B | -B9B  | 41.5(2)   |
| B1B | -B3B | -B8B | -Pt7B | -5.7(4)   |
| B1B | -B3B | -B8B | -O8B  | 147.9(4)  |
| B9B | -B3B | -B4B | -B10B | -45.4(3)  |
| B8B | -B3B | -B4B | -B10B | -9.5(4)   |
| B9B | -B3B | -B4B | -B1B  | -141.8(3) |
| B2B | -B3B | -B8B | -B9B  | -132.6(3) |
| B1B | -B3B | -B4B | -B10B | 96.4(3)   |
| B4B | -B3B | -B8B | -Pt7B | 60.2(3)   |
| B4B | -B3B | -B8B | -O8B  | -146.3(4) |
| B4B | -B3B | -B8B | -B2B  | 98.1(3)   |
| B4B | -B3B | -B8B | -B9B  | -34.6(3)  |
| B9B | -B3B | -B8B | -Pt7B | 94.8(2)   |
| B9B | -B3B | -B4B | -B5B  | -112.1(4) |
| B8B | -B3B | -B4B | -B9B  | 35.9(3)   |
| B8B | -B3B | -B9B | -B4B  | -141.5(3) |
| B9B | -B3B | -B8B | -O8B  | -111.7(4) |
| B9B | -B3B | -B8B | -B2B  | 132.6(3)  |
| B1B | -B3B | -B9B | -B4B  | -34.9(3)  |
| B1B | -B3B | -B8B | -B2B  | 32.2(3)   |
| B8B | -B3B | -B4B | -B5B  | -76.2(4)  |
| B1B | -B3B | -B4B | -B9B  | 141.8(3)  |
| B2B | -B3B | -B8B | -O8B  | 115.7(4)  |
| B2B | -B3B | -B9B | -B4B  | -98.7(3)  |
| B2B | -B3B | -B4B | -B1B  | -40.7(3)  |
| B2B | -B3B | -B4B | -B5B  | -11.0(4)  |

Table S7 - Torsion Angles (Degrees) (continued)  
for [9-(OMe)-8,8-(PMe2Ph)2-NIDO-8,7-PtCB9H11] (2)

|      |      |      |       |           |
|------|------|------|-------|-----------|
| B2B  | -B3B | -B4B | -B9B  | 101.1(3)  |
| B2B  | -B3B | -B4B | -B10B | 55.7(4)   |
| B8B  | -B3B | -B4B | -B1B  | -105.9(3) |
| B8B  | -B3B | -B9B | -B10B | -103.4(3) |
| B1B  | -B3B | -B4B | -B5B  | 29.7(3)   |
| B1B  | -B3B | -B9B | -B10B | 3.2(3)    |
| B1B  | -B3B | -B8B | -B9B  | -100.4(3) |
| B2B  | -B3B | -B8B | -Pt7B | -37.9(2)  |
| B1B  | -B3B | -B9B | -B8B  | 106.6(3)  |
| B2B  | -B3B | -B9B | -B8B  | 42.8(3)   |
| B2B  | -B3B | -B9B | -B10B | -60.6(3)  |
| B4B  | -B3B | -B9B | -B10B | 38.1(3)   |
| B4B  | -B3B | -B9B | -B8B  | 141.5(3)  |
| B3B  | -B4B | -B5B | -B1B  | -29.7(3)  |
| B3B  | -B4B | -B5B | -B6B  | 11.4(4)   |
| B3B  | -B4B | -B5B | -C11B | 70.7(4)   |
| B10B | -B4B | -B5B | -C11B | -33.4(3)  |
| B10B | -B4B | -B5B | -B1B  | -133.7(3) |
| B1B  | -B4B | -B5B | -B10B | 133.7(3)  |
| B3B  | -B4B | -B9B | -B8B  | -33.6(3)  |
| B1B  | -B4B | -B5B | -B6B  | 41.1(3)   |
| B3B  | -B4B | -B9B | -B10B | -134.0(3) |
| B5B  | -B4B | -B9B | -B3B  | 98.7(3)   |
| B5B  | -B4B | -B9B | -B8B  | 65.0(4)   |
| B5B  | -B4B | -B9B | -B10B | -35.3(3)  |
| B10B | -B4B | -B9B | -B3B  | 134.0(3)  |
| B10B | -B4B | -B9B | -B8B  | 100.4(3)  |
| B9B  | -B4B | -B5B | -B10B | 37.2(3)   |



Table S7 - Torsion Angles (Degrees) (continued)  
for [9-(OMe)-8,8-(PMe2Ph)2-NIDO-8,7-PtCB9H11] (2)

|      |      |       |       |           |
|------|------|-------|-------|-----------|
| B9B  | -B4B | -B5B  | -C11B | 3.8(4)    |
| B9B  | -B4B | -B5B  | -B1B  | -96.5(4)  |
| B10B | -B4B | -B5B  | -B6B  | -92.7(3)  |
| B1B  | -B4B | -B9B  | -B3B  | 34.2(3)   |
| B1B  | -B4B | -B9B  | -B8B  | 0.5(4)    |
| B1B  | -B4B | -B9B  | -B10B | -99.8(3)  |
| B9B  | -B4B | -B10B | -B5B  | -144.8(3) |
| B9B  | -B4B | -B10B | -C11B | -108.8(3) |
| B1B  | -B4B | -B5B  | -C11B | 100.3(3)  |
| B3B  | -B4B | -B10B | -C11B | -66.4(4)  |
| B9B  | -B4B | -B5B  | -B6B  | -55.4(4)  |
| B3B  | -B4B | -B10B | -B5B  | -102.5(3) |
| B3B  | -B4B | -B10B | -B9B  | 42.3(3)   |
| B5B  | -B4B | -B10B | -C11B | 36.0(3)   |
| B3B  | -B4B | -B5B  | -B10B | 104.1(3)  |
| B1B  | -B4B | -B10B | -B9B  | 104.7(3)  |
| B1B  | -B4B | -B10B | -C11B | -4.1(4)   |
| B1B  | -B4B | -B10B | -B5B  | -40.1(3)  |
| B5B  | -B4B | -B10B | -B9B  | 144.8(3)  |
| B4B  | -B5B | -B6B  | -Pt7B | 62.7(3)   |
| B4B  | -B5B | -B6B  | -C11B | 94.8(3)   |
| B1B  | -B5B | -B6B  | -B2B  | 34.7(3)   |
| C11B | -B5B | -B6B  | -B1B  | -136.6(3) |
| B1B  | -B5B | -B6B  | -Pt7B | 104.6(3)  |
| B1B  | -B5B | -B6B  | -C11B | 136.6(3)  |
| B1B  | -B5B | -B10B | -B4B  | 41.9(3)   |
| B1B  | -B5B | -B10B | -B9B  | 11.8(4)   |
| B4B  | -B5B | -B10B | -C11B | -138.8(3) |

Table S7 - Torsion Angles (Degrees) (continued)  
for [9-(OMe)-8,8-(PMe2Ph)2-NIDO-8,7-PtCB9H11] (2)

|      |      |       |       |           |
|------|------|-------|-------|-----------|
| B4B  | -B5B | -B10B | -B9B  | -30.1(3)  |
| B6B  | -B5B | -B10B | -C11B | -34.6(3)  |
| C11B | -B5B | -B6B  | -B2B  | -102.0(3) |
| C11B | -B5B | -B6B  | -Pt7B | -32.1(2)  |
| B10B | -B5B | -B6B  | -Pt7B | 1.3(3)    |
| B10B | -B5B | -B6B  | -B1B  | -103.3(3) |
| B10B | -B5B | -B6B  | -B2B  | -68.6(3)  |
| C11B | -B5B | -B10B | -B4B  | 138.8(3)  |
| C11B | -B5B | -B10B | -B9B  | 108.6(3)  |
| B1B  | -B5B | -B10B | -C11B | -96.9(3)  |
| B4B  | -B5B | -B6B  | -B1B  | -41.8(3)  |
| B4B  | -B5B | -B6B  | -B2B  | -7.2(4)   |
| B6B  | -B5B | -B10B | -B9B  | 74.1(3)   |
| B10B | -B5B | -B6B  | -C11B | 33.3(3)   |
| B6B  | -B5B | -B10B | -B4B  | 104.2(3)  |
| O8B  | -B8B | -B9B  | -B4B  | 155.0(3)  |
| O8B  | -B8B | -B9B  | -B10B | -145.2(3) |
| O8B  | -B8B | -B9B  | -B3B  | 120.1(4)  |
| B3B  | -B8B | -B9B  | -B10B | 94.8(3)   |
| Pt7B | -B8B | -B9B  | -B4B  | -74.3(3)  |
| Pt7B | -B8B | -B9B  | -B3B  | -109.1(2) |
| Pt7B | -B8B | -B9B  | -B10B | -14.4(3)  |
| B3B  | -B8B | -B9B  | -B4B  | 34.9(3)   |
| B2B  | -B8B | -B9B  | -B3B  | -41.4(2)  |
| B2B  | -B8B | -B9B  | -B10B | 53.3(3)   |
| B2B  | -B8B | -B9B  | -B4B  | -6.6(4)   |
| B4B  | -B9B | -B10B | -B5B  | 31.0(3)   |

B3B

-B9B

-B10B

-B5B

-9.2(3)

Table S7 - Torsion Angles (Degrees) (continued)  
for [9-(OMe)-8,8-(PMe2Ph)2-NIDO-8,7-PtCB9H11] (2)

|     |      |       |       |           |
|-----|------|-------|-------|-----------|
| B4B | -B9B | -B10B | -C11B | 94.0(4)   |
| B3B | -B9B | -B10B | -B4B  | -40.2(3)  |
| B8B | -B9B | -B10B | -C11B | -6.3(4)   |
| B3B | -B9B | -B10B | -C11B | 53.8(4)   |
| B8B | -B9B | -B10B | -B5B  | -69.2(3)  |
| B8B | -B9B | -B10B | -B4B  | -100.2(3) |

Table S8 - Contact Distances(Angstrom)  
for [9-(OMe)-8,8-(PMe2Ph)2-NIDO-8,7-PtCB9H11] (2)

|      |         |            |      |        |          |
|------|---------|------------|------|--------|----------|
| Pt7A | .H136   | 3.0900     | C8A  | .B1A   | 2.723(5) |
| Pt7B | .H332   | 3.0000     | C8A  | .C22   | 3.245(5) |
| P1   | .O11A   | 3.108(3)   | C8A  | .P2    | 3.118(4) |
| P1   | .C231   | 3.636(3)   | C8A  | .B10A  | 3.011(7) |
| P1   | .B2A    | 3.352(4)   | C8A  | .B2A   | 2.860(5) |
| P1   | .B11A   | 3.242(4)   | C8A  | .B6A   | 3.376(5) |
| P1   | .P2     | 3.4378(15) | C8A  | .B11A  | 3.239(6) |
| P2   | .P1     | 3.4378(15) | C11  | .O11A  | 3.226(5) |
| P2   | .C131   | 3.688(4)   | C11B | .B9B   | 2.981(6) |
| P2   | .C8A    | 3.118(4)   | C11B | .B8B   | 3.198(5) |
| P3   | .O8B    | 3.139(3)   | C11B | .P4    | 3.110(4) |
| P3   | .P4     | 3.4495(15) | C11B | .B3B   | 3.364(5) |
| P3   | .B8B    | 3.280(4)   | C11B | .B1B   | 2.721(5) |
| P3   | .C431   | 3.632(3)   | C11B | .B2B   | 2.860(5) |
| P3   | .B2B    | 3.344(4)   | C11B | .C41   | 3.306(6) |
| P4   | .C11B   | 3.110(4)   | C12  | .C32_a | 3.388(5) |
| P4   | .P3     | 3.4495(15) | C12  | .C232  | 3.482(5) |
| P2   | .H8A    | 2.91(4)    | C12  | .C231  | 3.420(5) |
| P4   | .H11B   | 2.88(3)    | C12  | .O11A  | 3.231(5) |
| O8B  | .C31    | 3.226(5)   | C21  | .C136  | 3.591(5) |
| O8B  | .C32    | 3.310(4)   | C31  | .O8B   | 3.226(5) |
| O11A | .C11    | 3.226(5)   | C32  | .C431  | 3.457(5) |
| O11A | .C12    | 3.231(5)   | C32  | .O8B   | 3.310(4) |
| O8B  | .H32B   | 2.6500     | C32  | .C12_n | 3.388(5) |
| O8B  | .H17C_m | 2.7600     | C32  | .C436  | 3.501(5) |
| O8B  | .H31A   | 2.5600     | C8A  | .H24C  | 2.8200   |
| O11A | .H12F   | 2.5600     | C8A  | .H101  | 2.71(4)  |
| O11A | .H11I   | 2.5700     | C8A  | .H3A   | 2.4400   |

Table S8 - Contact Distances(Angstrom) (continued)  
for [9-(OMe)-8,8-(PMe2Ph)2-NIDO-8,7-PtCB9H11] (2)

|      |         |          |      |         |          |
|------|---------|----------|------|---------|----------|
| C8B  | .H17B_b | 3.0600   | C132 | .H236   | 2.9300   |
| C8B  | .H32B   | 3.0300   | C232 | .C12    | 3.482(5) |
| C11  | .H2A    | 2.7200   | C134 | .H31B_b | 3.0600   |
| C11A | .H12F   | 2.9700   | C234 | .C334_e | 3.406(5) |
| C11A | .H10A   | 3.05(4)  | C135 | .H20C   | 3.0800   |
| C11B | .H41B   | 2.7700   | C235 | .C333_e | 3.559(5) |
| C11B | .H6B    | 2.4400   | C235 | .C334_e | 3.494(5) |
| C11B | .H89    | 2.67(3)  | C236 | .C132   | 3.254(5) |
| C12  | .H32B_a | 3.0100   | C136 | .H20C   | 2.8300   |
| C12  | .H132   | 2.6900   | C236 | .C131   | 3.560(5) |
| C21  | .H236   | 2.7700   | C231 | .H12D   | 2.6200   |
| C22  | .H232   | 2.8400   | C331 | .C432   | 3.362(5) |
| C22  | .H8A    | 2.81(4)  | C232 | .H1A_d  | 3.0400   |
| C31  | .H2B    | 2.77(4)  | C232 | .H24B   | 2.9800   |
| C131 | .C236   | 3.560(5) | C232 | .H12D   | 2.6700   |
| C32  | .H336   | 2.7200   | C333 | .C235_o | 3.559(5) |
| C132 | .C236   | 3.254(5) | C233 | .H4A_d  | 3.0000   |
| C32  | .H12F_n | 3.0200   | C233 | .H12D   | 2.8700   |
| C134 | .C435_c | 3.431(7) | C334 | .C235_o | 3.494(5) |
| C136 | .C21    | 3.591(5) | C334 | .C234_o | 3.406(5) |
| C41  | .H436   | 2.7600   | C234 | .H12D   | 2.9800   |
| C41  | .H11B   | 2.96(3)  | C234 | .H30B_a | 2.9700   |
| C42  | .H11B   | 3.06(3)  | C235 | .H12D   | 2.9600   |
| C42  | .H432   | 2.7600   | C235 | .H30B_a | 2.9600   |
| C231 | .C12    | 3.420(5) | C235 | .H334_e | 3.0900   |
| C132 | .H12D   | 3.0800   | C235 | .H4B_f  | 3.0300   |
| C132 | .H12E   | 3.0100   | C336 | .C433   | 3.568(6) |
| C132 | .H10B   | 3.05(4)  | C236 | .H20C   | 3.0100   |

Table S8 - Contact Distances(Angstrom) (continued)  
for [9-(OMe)-8,8-(PMe2Ph)2-NIDO-8,7-PtCB9H11] (2)

|      |         |          |      |       |          |
|------|---------|----------|------|-------|----------|
| C236 | .H12D   | 2.8000   | B2A  | .P1   | 3.352(4) |
| C336 | .C432   | 3.239(5) | B2A  | .C11  | 3.381(6) |
| C431 | .C32    | 3.457(5) | B2A  | .B4A  | 2.921(6) |
| C331 | .H432   | 3.0400   | B2A  | .B9A  | 3.310(6) |
| C432 | .C336   | 3.239(5) | B2A  | .B10A | 2.879(7) |
| C332 | .H17A   | 2.8800   | B2B  | .P3   | 3.344(4) |
| C432 | .C331   | 3.362(5) | B2B  | .O8B  | 2.870(5) |
| C433 | .C336   | 3.568(6) | B2B  | .B10B | 3.334(6) |
| C334 | .H11G_p | 3.0500   | B2B  | .C11B | 2.860(5) |
| C335 | .H9A_q  | 2.76(4)  | B2B  | .C31  | 3.379(6) |
| C435 | .C134_s | 3.431(7) | B2B  | .B5B  | 2.926(6) |
| C336 | .H432   | 2.9700   | B2B  | .B9B  | 2.887(6) |
| C436 | .C32    | 3.501(5) | B3A  | .B6A  | 2.929(6) |
| C336 | .H32C   | 3.0000   | B3A  | .B11A | 3.146(6) |
| C336 | .H9A_q  | 2.92(4)  | B3A  | .B9A  | 2.741(7) |
| C431 | .H32A   | 2.6600   | B6B  | .B10B | 2.752(6) |
| C432 | .H32A   | 2.9800   | B6B  | .B3B  | 2.931(6) |
| C432 | .H17A   | 3.0200   | B6B  | .B8B  | 3.120(6) |
| C433 | .H5A_r  | 2.8800   | B8B  | .P3   | 3.280(4) |
| C434 | .H11E_n | 2.8200   | B8B  | .B1B  | 2.933(6) |
| C435 | .H134_s | 2.9200   | B8B  | .C11B | 3.198(5) |
| C435 | .H32A   | 2.9200   | B8B  | .B10B | 3.061(6) |
| C436 | .H32A   | 2.6300   | B8B  | .B6B  | 3.120(6) |
| C436 | .H41C   | 2.9200   | B11A | .B3A  | 3.146(6) |
| C436 | .H1B_b  | 3.0600   | B11A | .P1   | 3.242(4) |
| C436 | .H5B_b  | 3.0700   | B11A | .B9A  | 3.052(6) |
| B2A  | .O11A   | 2.871(5) | B11A | .B1A  | 2.937(6) |
| B2A  | .C8A    | 2.860(5) | B11A | .C8A  | 3.239(6) |

Table S8 - Contact Distances(Angstrom) (continued)  
for [9-(OMe)-8,8-(PMe2Ph)2-NIDO-8,7-PtCB9H11] (2)

|      |         |         |      |         |         |
|------|---------|---------|------|---------|---------|
| B1B  | .H436_a | 2.9800  | H4B  | .H11H   | 2.5500  |
| B2A  | .H101   | 2.85(4) | H5A  | .C433_i | 2.8800  |
| B2A  | .H3A    | 2.6300  | H5A  | .H433_i | 2.2800  |
| B2B  | .H6B    | 2.6400  | H5B  | .H436_a | 2.4700  |
| B2B  | .H89    | 2.85(3) | H5B  | .C436_a | 3.0700  |
| B3A  | .H8A    | 2.31(4) | H5B  | .H12E   | 2.3900  |
| B3A  | .H2A    | 2.6000  | H6A  | .H11D_j | 2.4800  |
| B5B  | .H436_a | 2.9900  | H6B  | .H41C_a | 2.3800  |
| B6B  | .H11B   | 2.25(3) | H8A  | .H11F_g | 2.4800  |
| B6B  | .H2B    | 2.62(4) | H8A  | .H24C   | 2.1800  |
| B8B  | .H2B    | 2.51(4) | H8A  | .C22    | 2.81(4) |
| B9B  | .H30C   | 2.9400  | H9A  | .C335_h | 2.76(4) |
| B10A | .H11F   | 2.8600  | H9A  | .C336_h | 2.92(4) |
| B11A | .H2A    | 2.5300  | H9A  | .H335_h | 2.5200  |
| H1A  | .C232_g | 3.0400  | H10A | .C11A   | 3.05(4) |
| H1A  | .H232_g | 2.4500  | H10B | .C132   | 3.05(4) |
| H1B  | .C436_a | 3.0600  | H11B | .C41    | 2.96(3) |
| H1B  | .H436_a | 2.4000  | H11B | .C42    | 3.06(3) |
| H2A  | .H11G   | 2.2100  | H11B | .H41B   | 2.3100  |
| H2A  | .C11    | 2.7200  | H11B | .H17B   | 2.4500  |
| H2B  | .C31    | 2.77(4) | H11D | .H6A_j  | 2.4800  |
| H2B  | .H31B   | 2.2700  | H11E | .H434_a | 2.5500  |
| H2B  | .H41A_m | 2.6000  | H11E | .C434_a | 2.8200  |
| H4A  | .H32C_h | 2.5900  | H11F | .B10A   | 2.8600  |
| H4A  | .C233_g | 3.0000  | H11F | .H101   | 2.4100  |
| H4A  | .H233_g | 2.4400  | H11F | .H8A_d  | 2.4800  |
| H4B  | .H235_k | 2.3300  | H11G | .C334_b | 3.0500  |
| H4B  | .C235_k | 3.0300  | H11G | .H334_b | 2.4600  |





Table S8 - Contact Distances(Angstrom) (continued)  
for [9-(OMe)-8,8-(PMe2Ph)2-NIDO-8,7-PtCB9H11] (2)

|      |         |        |      |         |        |
|------|---------|--------|------|---------|--------|
| H11G | .H2A    | 2.2100 | H20C | .C136   | 2.8300 |
| H11H | .H4B    | 2.5500 | H20C | .H236   | 2.3700 |
| H11I | .O11A   | 2.5700 | H20C | .C236   | 3.0100 |
| H11I | .H20A_k | 2.4300 | H24B | .C232   | 2.9800 |
| H12D | .C235   | 2.9600 | H24B | .H232   | 2.3800 |
| H12D | .C233   | 2.8700 | H24C | .C8A    | 2.8200 |
| H12D | .C234   | 2.9800 | H24C | .H8A    | 2.1800 |
| H12D | .C132   | 3.0800 | H30A | .H17B_b | 2.5900 |
| H12D | .C231   | 2.6200 | H30A | .H30A_t | 2.5300 |
| H12D | .C232   | 2.6700 | H30B | .C235_n | 2.9600 |
| H12D | .C236   | 2.8000 | H30B | .C234_n | 2.9700 |
| H12D | .H132   | 2.5500 | H30C | .H89    | 2.4400 |
| H12E | .H5B    | 2.3900 | H30C | .B9B    | 2.9400 |
| H12E | .C132   | 3.0100 | H31A | .H17C_m | 2.5900 |
| H12E | .H132   | 2.3900 | H31A | .O8B    | 2.5600 |
| H12F | .O11A   | 2.5600 | H31B | .H134_p | 2.4600 |
| H12F | .C11A   | 2.9700 | H31B | .H2B    | 2.2700 |
| H12F | .C32_a  | 3.0200 | H31B | .C134_p | 3.0600 |
| H17A | .C332   | 2.8800 | H31C | .H32C   | 2.5700 |
| H17A | .H432   | 2.3800 | H32A | .C432   | 2.9800 |
| H17A | .C432   | 3.0200 | H32A | .C431   | 2.6600 |
| H17B | .H11B   | 2.4500 | H32A | .C435   | 2.9200 |
| H17B | .C8B_a  | 3.0600 | H32A | .C436   | 2.6300 |
| H17B | .H30A_a | 2.5900 | H32B | .C8B    | 3.0300 |
| H17C | .O8B_f  | 2.7600 | H32B | .O8B    | 2.6500 |
| H17C | .H31A_f | 2.5900 | H32B | .C12_n  | 3.0100 |
| H20A | .H11I_l | 2.4300 | H32C | .H4A_q  | 2.5900 |
| H20C | .C135   | 3.0800 | H32C | .C336   | 3.0000 |



Table S8 - Contact Distances(Angstrom) (continued)  
for [9-(OMe)-8,8-(PMe2Ph)2-NIDO-8,7-PtCB9H11] (2)

|      |         |        |      |         |        |
|------|---------|--------|------|---------|--------|
| H32C | .H31C   | 2.5700 | H235 | .H4B_f  | 2.3300 |
| H32C | .H336   | 2.3500 | H236 | .C132   | 2.9300 |
| H41A | .H2B_f  | 2.6000 | H236 | .H20C   | 2.3700 |
| H41B | .H133   | 2.5600 | H236 | .C21    | 2.7700 |
| H41B | .C11B   | 2.7700 | H332 | .Pt7B   | 3.0000 |
| H41B | .H11B   | 2.3100 | H334 | .H11G_p | 2.4600 |
| H41C | .C436   | 2.9200 | H334 | .C235_o | 3.0900 |
| H41C | .H436   | 2.2800 | H335 | .H9A_q  | 2.5200 |
| H41C | .H6B_b  | 2.3800 | H336 | .C32    | 2.7200 |
| H89  | .H30C   | 2.4400 | H336 | .H32C   | 2.3500 |
| H101 | .H11F   | 2.4100 | H432 | .C42    | 2.7600 |
| H132 | .H12E   | 2.3900 | H432 | .C331   | 3.0400 |
| H132 | .C12    | 2.6900 | H432 | .C336   | 2.9700 |
| H132 | .H12D   | 2.5500 | H432 | .H17A   | 2.3800 |
| H133 | .H41B   | 2.5600 | H433 | .H5A_r  | 2.2800 |
| H134 | .H31B_b | 2.4600 | H434 | .H11E_n | 2.5500 |
| H134 | .C435_c | 2.9200 | H436 | .C41    | 2.7600 |
| H136 | .Pt7A   | 3.0900 | H436 | .H41C   | 2.2800 |
| H232 | .C22    | 2.8400 | H436 | .B1B_b  | 2.9800 |
| H232 | .H1A_d  | 2.4500 | H436 | .B5B_b  | 2.9900 |
| H232 | .H24B   | 2.3800 | H436 | .H1B_b  | 2.4000 |
| H233 | .H4A_d  | 2.4400 | H436 | .H5B_b  | 2.4700 |

Table S9 - Hydrogen Bonds (Angstrom, Deg)  
for [9-(OMe)-8,8-(PMe2Ph)2-NIDO-8,7-PtCB9H11] (2)

|      |    |      |    |      |        |        |          |        |       |
|------|----|------|----|------|--------|--------|----------|--------|-------|
| C11  | -- | H11G | .. | H2A  | 0.9800 | 2.2100 | 2.7200   | 111.00 | .     |
| C11  | -- | H11I | .. | O11A | 0.9800 | 2.5700 | 3.226(5) | 124.00 | .     |
| C12  | -- | H12F | .. | O11A | 0.9800 | 2.5600 | 3.231(5) | 126.00 | .     |
| C31  | -- | H31A | .. | O8B  | 0.9800 | 2.5600 | 3.226(5) | 125.00 | .     |
| C31  | -- | H31B | .. | H2B  | 0.9800 | 2.2700 | 2.77(4)  | 111.00 | .     |
| C433 | -- | H433 | .. | H5A  | 0.9500 | 2.2800 | 2.8800   | 120.00 | 4_556 |

Translation of Symmetry Code to Equiv.Pos

a = [ 2556.00 ] = 1/2-x, 1/2+y, 1-z  
b = [ 2546.00 ] = 1/2-x, -1/2+y, 1-z  
c = [ 3656.00 ] = 1-x, -y, 1-z  
d = [ 2555.00 ] = 1/2-x, 1/2+y, -z  
e = [ 3666.00 ] = 1-x, 1-y, 1-z  
f = [ 4555.00 ] = 1/2+x, 1/2-y, z  
g = [ 2545.00 ] = 1/2-x, -1/2+y, -z  
h = [ 1554.00 ] = x, y, -1+z  
i = [ 4454.00 ] = -1/2+x, 1/2-y, -1+z  
j = [ 3565.00 ] = -x, 1-y, -z  
k = [ 4455.00 ] = -1/2+x, 1/2-y, z  
l = [ 4555.00 ] = 1/2+x, 1/2-y, z  
m = [ 4455.00 ] = -1/2+x, 1/2-y, z  
n = [ 2546.00 ] = 1/2-x, -1/2+y, 1-z  
o = [ 3666.00 ] = 1-x, 1-y, 1-z  
p = [ 2556.00 ] = 1/2-x, 1/2+y, 1-z  
q = [ 1556.00 ] = x, y, 1+z  
r = [ 4556.00 ] = 1/2+x, 1/2-y, 1+z  
s = [ 3656.00 ] = 1-x, -y, 1-z  
t = [ 3556.00 ] = -x, -y, 1-z

Table 18 Selected interatomic distances (Å) for [8,8-(PPh<sub>3</sub>)-*nido*-8,7-RhSB<sub>9</sub>H<sub>10</sub>] (**4**), with estimated standard uncertainties (s.u) in parentheses; and the corresponding calculated for the model compound [8,8-(PH<sub>3</sub>)-*nido*-8,7-RhSB<sub>9</sub>H<sub>10</sub>] (**4a**)

---

(a) From the metal atom

|            | <u>Compound <b>4</b></u> | <u>Compound <b>4a</b></u> |
|------------|--------------------------|---------------------------|
| P(1)-Rh(8) | 2.2906(5)                | 2.291                     |
| P(2)-Rh(8) | 2.4197(5)                | 2.403                     |
| B(3)-Rh(8) | 2.242(4)                 | 2.294                     |
| B(4)-Rh(8) | 2.236(3)                 | 2.244                     |
| B(9)-Rh(8) | 2.146(3)                 | 2.226                     |
| S(7)-Rh(8) | 2.3769(6)                | 2.430                     |

(b) Heteroatom-boron

|            | <u>Compound <b>4</b></u> | <u>Compound <b>4a</b></u> |
|------------|--------------------------|---------------------------|
| S(7)-B(2)  | 1.986(4)                 | 2.004                     |
| S(7)-B(3)  | 2.035(4)                 | 2.071                     |
| S(7)-B(11) | 1.908(4)                 | 1.936                     |

(c) Boron-boron

|                      | <u>Compound <b>4</b></u> | <u>Compound <b>4a</b></u> |
|----------------------|--------------------------|---------------------------|
| B(2)-B(3)(longest)   | 1.887(5)                 | 1.874                     |
| B(6)-B(11)(shortest) | 1.713(6)                 | 1.719                     |
| B(9)-B(10)           | 1.863(7)                 | 1.828                     |

---

Table S19 Calculated coordinates (DFT; B3LYP / 6-31G\*, LANL2DZ) for [isonido-(PH<sub>3</sub>)<sub>2</sub>HRhSB<sub>9</sub>H<sub>9</sub>] (compound **4b**).

|    |           |           |           |
|----|-----------|-----------|-----------|
| Rh | -0.600953 | 0.006326  | 0.253231  |
| B  | 1.564117  | 1.302350  | -1.026824 |
| B  | 1.216561  | 1.409606  | 0.821672  |
| B  | 0.546023  | 0.286545  | 2.039341  |
| S  | 0.580530  | -0.099088 | -1.874579 |
| P  | -2.186431 | -1.758533 | -0.062135 |
| P  | -2.011345 | 1.863365  | -0.152477 |
| B  | 1.096106  | -1.245248 | 1.241448  |
| B  | 1.198075  | -1.483008 | -0.583621 |
| B  | 2.205092  | 0.095249  | 1.651201  |
| B  | 2.512418  | -0.289781 | -1.251153 |
| B  | 2.746801  | 0.788416  | 0.102358  |
| H  | -3.159644 | -1.768303 | -1.093354 |
| H  | 1.649196  | 2.296367  | -1.671497 |
| H  | -3.064551 | -2.039947 | 1.007951  |
| H  | -1.695207 | -3.067536 | -0.258925 |
| H  | 1.075309  | 2.557782  | 1.124562  |
| H  | -2.045624 | 2.852862  | 0.852614  |
| H  | -1.717469 | 2.706094  | -1.248896 |
| H  | -0.964815 | 0.085112  | 1.829980  |
| H  | 0.314815  | 0.558215  | 3.177725  |
| H  | -3.408516 | 1.760780  | -0.364073 |
| B  | 2.610883  | -1.015473 | 0.320924  |
| H  | 3.224979  | -0.513180 | -2.171311 |
| H  | 3.728285  | 1.459231  | 0.178977  |
| H  | 0.986271  | -2.565639 | -1.025600 |
| H  | 2.933834  | 0.203007  | 2.586018  |
| H  | 0.873397  | -2.262734 | 1.823672  |
| H  | 3.510394  | -1.777122 | 0.492459  |

Table S20 - Calculated coordinates (DFT; B3LYP / 6-31G\*, LANL2DZ) for [nido-(PH<sub>3</sub>)<sub>2</sub>HRhSB<sub>9</sub>H<sub>9</sub>] (compound **4a**).

|    |           |           |           |
|----|-----------|-----------|-----------|
| Rh | 0.781332  | -0.009079 | -0.192080 |
| B  | -2.361683 | -1.323040 | 0.710801  |
| B  | -1.964487 | 0.117768  | 1.860122  |
| B  | -0.464816 | 1.023003  | 1.336088  |
| S  | -0.980592 | -1.629778 | -0.610115 |
| P  | 2.347328  | -1.703281 | 0.480944  |
| P  | 2.233964  | 1.762148  | -0.136120 |
| B  | -0.771896 | 1.600787  | -0.369018 |
| B  | -1.082874 | 0.234130  | -1.506236 |
| B  | -2.054313 | 1.597592  | 0.854421  |



|   |           |           |           |
|---|-----------|-----------|-----------|
| B | -2.667126 | -0.607265 | -0.964423 |
| B | -3.126376 | 0.206386  | 0.534611  |
| H | 3.306787  | -2.234234 | -0.417500 |
| H | -2.857348 | -2.330840 | 1.096091  |
| H | 3.240586  | -1.450977 | 1.548904  |
| H | 1.842876  | -2.938049 | 0.948596  |
| H | -2.316406 | 0.095161  | 2.996991  |
| H | 2.497449  | 2.363087  | -1.386651 |
| H | 1.905132  | 2.911394  | 0.607706  |
| H | -0.749803 | -0.249579 | 1.819258  |
| H | 0.225149  | 1.546167  | 2.155840  |
| H | 3.574698  | 1.606579  | 0.296826  |
| B | -2.417750 | 1.130370  | -0.835867 |
| H | -3.372736 | -1.151259 | -1.747117 |
| H | -4.267321 | 0.264210  | 0.871001  |
| H | -0.754689 | 0.173076  | -2.647895 |
| H | -2.477238 | 2.618038  | 1.298740  |
| H | -0.359553 | 2.652057  | -0.765264 |
| H | -3.070810 | 1.828509  | -1.544925 |

Table S21 - Calculated coordinates (DFT; B3LYP / 6-31G\*, LANL2DZ) for [(PH<sub>3</sub>)<sub>2</sub>HRhSB<sub>9</sub>H<sub>9</sub>] (compound **4** transition state).

|    |           |           |           |
|----|-----------|-----------|-----------|
| Rh | 0.599210  | -0.000385 | 0.255319  |
| B  | -1.362597 | -1.414941 | -0.813839 |
| B  | -1.161988 | -1.347189 | 1.036963  |
| B  | -0.551134 | -0.003498 | 2.065751  |
| S  | -0.559020 | 0.002526  | -1.878299 |
| P  | 2.089838  | -1.809755 | -0.099711 |
| P  | 2.089206  | 1.810359  | -0.096675 |
| B  | -1.161741 | 1.343793  | 1.041726  |
| B  | -1.361754 | 1.417223  | -0.809018 |
| B  | -2.212516 | -0.002556 | 1.642235  |
| B  | -2.512036 | 0.002268  | -1.282331 |
| B  | -2.679816 | -0.913648 | 0.186086  |
| H  | 3.495185  | 1.639230  | -0.101149 |
| H  | -1.281848 | -2.469957 | -1.354628 |
| H  | 2.027348  | 2.860373  | 0.843733  |
| H  | 1.992896  | 2.593408  | -1.271254 |
| H  | -0.989434 | -2.441943 | 1.482963  |
| H  | 2.028293  | -2.861358 | 0.838891  |
| H  | 1.994291  | -2.590901 | -1.275640 |
| H  | 0.962914  | -0.002577 | 1.835550  |
| H  | -0.330205 | -0.005870 | 3.238223  |
| H  | 3.495688  | -1.637741 | -0.103570 |
| B  | -2.679507 | 0.913474  | 0.189098  |
| H  | -3.226439 | 0.004086  | -2.227769 |
| H  | -3.623857 | -1.632026 | 0.294184  |
| H  | -1.280096 | 2.473876  | -1.346469 |
| H  | -2.942526 | -0.004156 | 2.582273  |
| H  | -0.989144 | 2.437078  | 1.491285  |
| H  | -3.623410 | 1.631719  | 0.299262  |

Table S22 - Calculated coordinates (DFT; B3LYP / 6-31G\*, LANL2DZ) for [(PH<sub>3</sub>)<sub>2</sub>HRhNB<sub>9</sub>H<sub>10</sub>] (compound **1a** ground state).

Rh,0,-0.7029041093,-0.0877582892,-0.1278077119  
B,0,1.1427603348,-0.0558248966,-1.4932965783  
B,0,0.8534322887,1.5045249661,-0.5621045064  
B,0,0.5675606393,1.2452138558,1.1805677761  
N,0,1.1752559394,-1.2858546645,-0.4828270356  
H,0,0.9430980432,-2.2003726464,-0.8582514432  
P,0,-2.2152455187,-1.9301475836,0.1463929983  
P,0,-2.2830308077,1.5020078021,0.0188806517  
B,0,1.9725976753,0.2853857551,1.7890133425  
B,0,2.1596137177,-1.2799234366,0.7115254423  
B,0,2.1787910421,1.6307645665,0.6279128887  
B,0,2.705719127,-0.7827170975,-0.9352563495  
B,0,2.4947037912,0.9540989,-0.9945003423  
H,0,-3.3695612705,-2.0859828524,-0.6610004813  
H,0,0.7706017607,-0.2868057551,-2.6000535788  
H,0,-2.8616733316,-2.1137782792,1.3924173446  
H,0,-1.744649473,-3.2606751302,0.011651483  
H,0,0.4363216304,2.4729485921,-1.1221263847  
H,0,-1.9152907622,2.8276752348,-0.2869183674  
H,0,-2.9303257502,1.7344514571,1.2563397492  
H,0,0.7332937973,-0.0011386647,1.7927632629  
H,0,-0.0783391159,1.9099745331,1.9323892734  
H,0,-3.4415419776,1.3975679291,-0.7899017751  
B,0,3.1566965373,0.1261335258,0.4883937023  
H,0,3.3248049023,-1.513581476,-1.6332045144  
H,0,3.1364754455,1.5832405335,-1.7749524875  
H,0,2.4151610476,-2.3331573347,1.2002198879  
H,0,2.671552517,2.6663160841,0.9483016696  
H,0,2.341872242,0.2945275043,2.9206481048  
H,0,4.2868627645,0.1427119628,0.8624329142

Table S23 - Calculated coordinates (DFT; B3LYP / 6-31G\*, LANL2DZ) for [(PH<sub>3</sub>)<sub>2</sub>HRhNB<sub>9</sub>H<sub>10</sub>] (compound **1a** transition state).

Rh,0,-0.7029041093,-0.0877582892,-0.1278077119  
B,0,1.1427603348,-0.0558248966,-1.4932965783  
B,0,0.8534322887,1.5045249661,-0.5621045064  
B,0,0.5675606393,1.2452138558,1.1805677761  
N,0,1.1752559394,-1.2858546645,-0.4828270356  
H,0,0.9430980432,-2.2003726464,-0.8582514432  
P,0,-2.2152455187,-1.9301475836,0.1463929983  
P,0,-2.2830308077,1.5020078021,0.0188806517  
B,0,1.9725976753,0.2853857551,1.7890133425  
B,0,2.1596137177,-1.2799234366,0.7115254423  
B,0,2.1787910421,1.6307645665,0.6279128887  
B,0,2.705719127,-0.7827170975,-0.9352563495

B,0,2.4947037912,0.9540989,-0.9945003423  
H,0,-3.3695612705,-2.0859828524,-0.6610004813  
H,0,0.7706017607,-0.2868057551,-2.6000535788  
H,0,-2.8616733316,-2.1137782792,1.3924173446  
H,0,-1.744649473,-3.2606751302,0.011651483  
H,0,0.4363216304,2.4729485921,-1.1221263847  
H,0,-1.9152907622,2.8276752348,-0.2869183674  
H,0,-2.9303257502,1.7344514571,1.2563397492  
H,0,0.7332937973,-0.0011386647,1.7927632629  
H,0,-0.0783391159,1.9099745331,1.9323892734  
H,0,-3.4415419776,1.3975679291,-0.7899017751  
B,0,3.1566965373,0.1261335258,0.4883937023  
H,0,3.3248049023,-1.513581476,-1.6332045144  
H,0,3.1364754455,1.5832405335,-1.7749524875  
H,0,2.4151610476,-2.3331573347,1.2002198879  
H,0,2.671552517,2.6663160841,0.9483016696  
H,0,2.341872242,0.2945275043,2.9206481048  
H,0,4.2868627645,0.1427119628,0.8624329142
